# Supplementary material for: Hemiparetic koneramine NNP ligand comprising strategic hard and soft donors: transition metal complexes, CS 2 activation and therapeutic potential
Source: Royal Society of Chemistry journal article supplement (doi:10.1039/d5dt02106e), 2025-01-01
Supplement: d5dt02106e1.pdf [file d5dt02106e1.pdf]

## Electronic Supporting Information

### **Hemiparetic Koneramine NNP Ligand Comprising Strategic Hard and Soft Donors: Transition Metal Complexes, CS<sub>2</sub> Activation and Therapeutic Potential**

Archana Yadav,<sup>a</sup> Sayari Dewan,<sup>a</sup> Kajal Chaudhary,<sup>a</sup> Ray J. Butcher,<sup>b</sup> Ritika Gautam Singh<sup>a</sup> and Raja Angamuthu<sup>\*a</sup>

<sup>a</sup> Department of Chemistry, Indian Institute of Technology Kanpur, Kanpur 208016, India.

<sup>b</sup> Department of Chemistry, Howard University, Washington, D.C, 20059, USA.

\* All correspondence should be addressed to [raja@iitk.ac.in](mailto:raja@iitk.ac.in)

## Table of contents:

|                                                                                                                                                               |    |
|---------------------------------------------------------------------------------------------------------------------------------------------------------------|----|
| Figure S 1. $^1\text{H}$ NMR spectrum of the (1) and (2) in $\text{CDCl}_3$ at 298 K. ....                                                                    | 26 |
| Figure S 2. $^{31}\text{P}$ NMR spectrum of the (1) and (2) in $\text{CDCl}_3$ at 298 K. ....                                                                 | 27 |
| Figure S 3. $^1\text{H}$ NMR spectrum of the $N^1$ -(2-(diphenylphosphaneyl)benzyl)- $N^2$ -phenylethane-1,2-diamine (3) in $\text{CDCl}_3$ at 298 K. ....    | 28 |
| Figure S 4. $^{13}\text{C}$ NMR spectrum of the $N^1$ -(2-(diphenylphosphaneyl)benzyl)- $N^2$ -phenylethane-1,2-diamine (3) in $\text{CDCl}_3$ at 298 K. .... | 29 |
| Figure S 5. $^{31}\text{P}$ NMR spectrum of the $N^1$ -(2-(diphenylphosphaneyl)benzyl)- $N^2$ -phenylethane-1,2-diamine (3) in $\text{CDCl}_3$ at 298 K. .... | 30 |
| Figure S 6. $^1\text{H}$ NMR spectrum of the NNP in $\text{CDCl}_3$ at 298 K. ....                                                                            | 31 |
| Figure S 7. $^{13}\text{C}$ NMR spectrum of the NNP in $\text{CDCl}_3$ at 298 K. ....                                                                         | 32 |
| Figure S 8. $^{31}\text{P}$ NMR spectrum of the NNP in $\text{CDCl}_3$ at 298 K. ....                                                                         | 33 |
| Figure S 9. ESI-MS of NNP ....                                                                                                                                | 34 |
| Figure S 10. Simulated ESI-MS of NNP ....                                                                                                                     | 35 |
| Figure S 11. $^1\text{H}$ NMR of $[\text{Zn}(\text{NNP})\text{Cl}_2]$ complex in $\text{CDCl}_3$ at 298 K. ....                                               | 36 |
| Figure S 12. $^{13}\text{C}$ NMR of $[\text{Zn}(\text{NNP})\text{Cl}_2]$ complex in $\text{CDCl}_3$ at 298 K. ....                                            | 37 |
| Figure S 13. $^{31}\text{P}$ NMR of $[\text{Zn}(\text{NNP})\text{Cl}_2]$ complex in $\text{CDCl}_3$ at 298 K. ....                                            | 38 |
| Figure S 14. Elemental analysis of $[\text{Zn}(\text{NNP})\text{Cl}_2]$ complex. ....                                                                         | 39 |
| Figure S 15. ESI-MS of $[\text{Zn}(\text{NNP})\text{Cl}_2]$ complex. ....                                                                                     | 40 |
| Figure S 16. ESI-MS of $[\text{Ni}(\text{NNP})\text{Cl}_2] \cdot \text{CH}_3\text{CN}$ ....                                                                   | 41 |
| Figure S 17. Simulated ESI-MS of $[\text{Ni}(\text{NNP})\text{Cl}_2] \cdot \text{CH}_3\text{CN}$ complex. ....                                                | 42 |
| Figure S 18. Elemental analysis of $[\text{Ni}(\text{NNP})\text{Cl}_2] \cdot \text{CH}_3\text{CN}$ complex. ....                                              | 43 |
| Figure S 19. Cyclic voltammogram of $[\text{Ni}(\text{NNP})\text{Cl}_2] \cdot \text{CH}_3\text{CN}$ ....                                                      | 44 |
| Figure S 20. $^1\text{H}$ NMR spectrum of the $[\text{Pd}(\text{NNP})\text{Cl}][\text{Cl}]$ in $\text{CDCl}_3$ at 298 K. ....                                 | 45 |
| Figure S 21. $^{13}\text{C}$ NMR spectrum of the $[\text{Pd}(\text{NNP})\text{Cl}][\text{Cl}]$ in $\text{CDCl}_3$ at 298 K. ....                              | 46 |
| Figure S 22. $^{31}\text{P}$ NMR spectrum of the $[\text{Pd}(\text{NNP})\text{Cl}][\text{Cl}]$ in $\text{CDCl}_3$ at 298 K. ....                              | 47 |
| Figure S 23. Elemental analysis of $[\text{Pd}(\text{NNP})\text{Cl}][\text{Cl}]$ . ....                                                                       | 48 |

|                                                                                                                                        |    |
|----------------------------------------------------------------------------------------------------------------------------------------|----|
| Figure S 24. ESI-MS of [Pd(NNP)Cl][Cl].....                                                                                            | 49 |
| Figure S 25. Simulated ESI-MS of [Pd(NNP)Cl][Cl] .....                                                                                 | 50 |
| Figure S 26. $^1\text{H}$ NMR spectrum of the [Pd(NNP)(SPhCH <sub>3</sub> )] [Cl] in CDCl <sub>3</sub> at 298 K. ....                  | 51 |
| Figure S 27. $^{13}\text{C}$ NMR spectrum of the [Pd(NNP)(SPhCH <sub>3</sub> )] [Cl] in CDCl <sub>3</sub> at 298 K. ....               | 52 |
| Figure S 28. $^{31}\text{P}$ NMR spectrum of the [Pd(NNP)(SPhCH <sub>3</sub> )] [Cl] in CDCl <sub>3</sub> at 298 K.....                | 53 |
| Figure S 29. ESI-MS of [Pd(NNP)(SPhCH <sub>3</sub> )] [Cl] .....                                                                       | 54 |
| Figure S 30. Simulated ESI-MS of [(NNP)Pd(SPhCH <sub>3</sub> )] [Cl] .....                                                             | 55 |
| Figure S 31. $^1\text{H}$ NMR spectrum of the [Pd(NNP)(SPhCH <sub>3</sub> )] [PF <sub>6</sub> ] in CDCl <sub>3</sub> at 298 K. ....    | 56 |
| Figure S 32. $^{31}\text{P}$ NMR spectrum of the [Pd(NNP)(SPhCH <sub>3</sub> )] [PF <sub>6</sub> ] in CDCl <sub>3</sub> at 298 K. .... | 57 |
| Figure S 33. $^1\text{H}$ NMR spectrum of [Ru(NNP)(PPh <sub>3</sub> )Cl <sub>2</sub> ] complex in CDCl <sub>3</sub> at 298 K.....      | 58 |
| Figure S 34. $^{31}\text{P}$ NMR spectrum of [Ru(NNP)(PPh <sub>3</sub> )Cl <sub>2</sub> ] complex in CDCl <sub>3</sub> at 298 K. ....  | 59 |
| Figure S 35. Elemental analysis of [Ru(NNP)(PPh <sub>3</sub> )Cl <sub>2</sub> ] complex. ....                                          | 60 |
| Figure S 36. ESI-MS of [Ru(NNP)(PPh <sub>3</sub> )Cl <sub>2</sub> ] .....                                                              | 61 |
| Figure S 37. Simulated ESI-MS of [Ru(NNP)(PPh <sub>3</sub> )Cl <sub>2</sub> ].....                                                     | 62 |
| Figure S 38. $^1\text{H}$ NMR spectrum of the <i>rac</i> -[(NNP)Ru(H)(CO)Cl] (crude) in CDCl <sub>3</sub> at 298 K.....                | 63 |
| Figure S 39. $^{31}\text{P}$ NMR spectrum of the <i>rac</i> -[Ru(NNP)(H)Cl(CO)] (crude) in CDCl <sub>3</sub> at 298 K. ....            | 64 |
| Figure S 40. $^1\text{H}$ NMR spectrum of the <i>anti-rac</i> -[Ru(NNP)(H)Cl(CO)] in CDCl <sub>3</sub> at 298 K. ....                  | 65 |
| Figure S 41. $^{31}\text{P}$ NMR spectrum of the <i>anti-rac</i> -[Ru(NNP)(H)Cl(CO)] in CDCl <sub>3</sub> at 298 K.....                | 66 |
| Figure S 42. $^1\text{H}$ NMR spectrum of the <i>syn-rac</i> -[Ru(NNP)(H)Cl(CO)] in CDCl <sub>3</sub> at 298 K. ....                   | 67 |
| Figure S 43. $^{31}\text{P}$ NMR spectrum of the <i>syn-rac</i> -[Ru(NNP)(H)Cl(CO)] in CDCl <sub>3</sub> at 298 K.....                 | 68 |
| Figure S 44. Elemental analysis of [Ru(NNP)(H)Cl(CO)].....                                                                             | 69 |
| Figure S 45. FTIR of [Ru(H)Cl(CO)(PPh <sub>3</sub> ) <sub>3</sub> ] .....                                                              | 70 |
| Figure S 46. FTIR of <i>syn</i> and <i>anti-rac</i> -[Ru(NNP)(H)Cl(CO)] .....                                                          | 71 |
| Figure S 47. ESI-MS of [Ru(NNP)(H)Cl(CO)].....                                                                                         | 72 |
| Figure S 48. Simulated ESI-MS of [Ru(NNP)(H)Cl(CO)].....                                                                               | 73 |

|                                                                                                                                                                    |    |
|--------------------------------------------------------------------------------------------------------------------------------------------------------------------|----|
| Figure S 49. Absorption spectra of <i>syn</i> and <i>anti-rac</i> -[Ru(NNP)(H)Cl(CO)] .....                                                                        | 74 |
| Figure S 50. Fluorescence spectrum of <i>syn</i> and <i>anti-rac</i> -[Ru(NNP)(H)Cl(CO)] .....                                                                     | 75 |
| Figure S 51. <sup>31</sup> P NMR spectrum for <i>anti-rac</i> -[Ru(NNP)(H)Cl(CO)] after adding CS <sub>2</sub> in CDCl <sub>3</sub> at 298 K.....                  | 76 |
| Figure S 52. <sup>31</sup> P NMR spectrum for <i>syn-rac</i> -[Ru(NNP)(H)Cl(CO)] after adding CS <sub>2</sub> in CDCl <sub>3</sub> at 298 K.....                   | 77 |
| Figure S 53. <sup>1</sup> H NMR spectrum of <i>anti-rac</i> -[Ru(NNP)(H)( $\eta^1$ -BH <sub>4</sub> )(CO)] complex in CDCl <sub>3</sub> at 298 K. ....             | 78 |
| Figure S 54. <sup>31</sup> P NMR spectrum of <i>anti-rac</i> -[Ru(NNP)(H)( $\eta^1$ -BH <sub>4</sub> )(CO)] complex in CDCl <sub>3</sub> at 298 K. ....            | 79 |
| Figure S 55. <sup>31</sup> P NMR spectrum of <i>syn-rac</i> -[Ru(NNP)(H)( $\eta^1$ -BH <sub>4</sub> )(CO)] complex in CDCl <sub>3</sub> at 298 K. ....             | 80 |
| Figure S 56. ESI-MS of [Ru(NNP)(H)( $\eta^1$ -BH <sub>4</sub> )(CO)] .....                                                                                         | 81 |
| Figure S 57. Simulated ESI-MS of [Ru(NNP)(H)( $\eta^1$ -BH <sub>4</sub> )(CO)] .....                                                                               | 82 |
| Figure S 58. <sup>1</sup> H NMR spectrum of [Ru(NNP)(CS <sub>2</sub> H) <sub>2</sub> (CO)] complex in CDCl <sub>3</sub> at 298 K. ....                             | 83 |
| Figure S 59. <sup>31</sup> P NMR spectrum of [Ru(NNP)(CS <sub>2</sub> H) <sub>2</sub> (CO)] complex in CDCl <sub>3</sub> at 298 K. ....                            | 84 |
| Figure S 60. ESI-MS of [Ru(NNP)(CS <sub>2</sub> H) <sub>2</sub> (CO)] .....                                                                                        | 85 |
| Figure S 61. Simulated for [Ru(NNP)(CS <sub>2</sub> H) <sub>2</sub> (CO)] .....                                                                                    | 86 |
| Figure S 62. FTIR spectrum of [Ru(NNP)(CS <sub>2</sub> H) <sub>2</sub> (CO)] .....                                                                                 | 87 |
| Figure S 63. <sup>1</sup> H NMR spectrum of crude [Ru(NNP)(CS <sub>2</sub> H) <sub>2</sub> (CO)] and after the addition of MeI in CDCl <sub>3</sub> at 298 K. .... | 88 |
| Figure S 64. <sup>31</sup> P NMR spectrum of [Ru(NNP)I <sub>2</sub> (CO)] complex in dichloromethane at 298 K.....                                                 | 89 |
| Figure S 65. ESI-MS for [Ru(NNP)I <sub>2</sub> (CO)] .....                                                                                                         | 90 |
| Figure S 66. Simulated ESI-MS for [Ru(NNP)I <sub>2</sub> (CO)] .....                                                                                               | 91 |
| Figure S 67. UV-Vis spectrum for [Ru(NNP)(CS <sub>2</sub> H) <sub>2</sub> (CO)] reaction with MeI. ....                                                            | 92 |
| Figure S 68. <sup>1</sup> H NMR spectrum of the [Cu(NNP)I] in CDCl <sub>3</sub> at 298 K. ....                                                                     | 93 |
| Figure S 69. <sup>31</sup> P NMR spectrum of the [Cu(NNP)I] in CDCl <sub>3</sub> at 298 K. ....                                                                    | 94 |
| Figure S 70. ESI-MS of [Cu(NNP)I] .....                                                                                                                            | 95 |



|                                                                                                                                                       |     |
|-------------------------------------------------------------------------------------------------------------------------------------------------------|-----|
| Figure S 71. Simulated ESI-MS of [Cu(NNP)I] .....                                                                                                     | 96  |
| Figure S 72. <sup>1</sup> H NMR spectrum of the [Cu(NNP)Cl] in CDCl <sub>3</sub> at 298 K. ....                                                       | 97  |
| Figure S 73. <sup>31</sup> P NMR spectrum of the [Cu(NNP)Cl] in CDCl <sub>3</sub> at 298 K.....                                                       | 98  |
| Figure S 74. <sup>1</sup> H NMR spectrum of the [Cu(NNP)(CH <sub>3</sub> CN)][BF <sub>4</sub> ] in CDCl <sub>3</sub> at 298 K. ....                   | 99  |
| Figure S 75. <sup>31</sup> P NMR spectrum of the [Cu(NNP)(CH <sub>3</sub> CN)][BF <sub>4</sub> ] in CDCl <sub>3</sub> at 298 K.....                   | 100 |
| Figure S 76. <sup>1</sup> H NMR spectrum of the [Cu(NNP)(CH <sub>3</sub> CN)][PF <sub>6</sub> ] in CDCl <sub>3</sub> at 298 K.....                    | 101 |
| Figure S 77. <sup>31</sup> P NMR spectrum of the [Cu(NNP)(CH <sub>3</sub> CN)][PF <sub>6</sub> ] in CDCl <sub>3</sub> at 298 K. ....                  | 102 |
| Figure S 78. <sup>1</sup> H NMR spectrum of the [Cu(NNP)(CH <sub>3</sub> CN)][OTf] in CDCl <sub>3</sub> at 298 K.....                                 | 103 |
| Figure S 79. <sup>31</sup> P NMR spectrum of the [Cu(NNP)(CH <sub>3</sub> CN)][OTf] in CDCl <sub>3</sub> at 298 K. ....                               | 104 |
| Figure S 80. <sup>1</sup> H NMR spectrum of the [Cu(NNP)(PPh <sub>3</sub> )][BF <sub>4</sub> ] in CDCl <sub>3</sub> at 298 K.....                     | 105 |
| Figure S 81. <sup>31</sup> P NMR spectrum of the [Cu(NNP)(PPh <sub>3</sub> )][BF <sub>4</sub> ] in CDCl <sub>3</sub> at 298 K. ....                   | 106 |
| Figure S 82. ESI-MS of [Cu <sub>2</sub> (NNP) <sub>2</sub> (μ-Cl) <sub>2</sub> ][CuCl <sub>2</sub> ].....                                             | 107 |
| Figure S 83. Simulated ESI-MS of [Cu <sub>2</sub> (NNP) <sub>2</sub> (μ-Cl) <sub>2</sub> ][CuCl <sub>2</sub> ], .....                                 | 108 |
| Figure S 84. Reduction of Cu(II) to Cu(I) using ascorbic acid.....                                                                                    | 109 |
| Figure S 85. <sup>1</sup> H NMR titration for the transmetallation of Zn(II) by Cu(I) in CDCl <sub>3</sub> :CD <sub>3</sub> CN mixture at 298 K.....  | 110 |
| Figure S 86. <sup>31</sup> P NMR titration for the transmetallation of Zn(II) by Cu(I) in CDCl <sub>3</sub> :CD <sub>3</sub> CN mixture at 298 K..... | 111 |
| Figure S 87. ESI-MS for the transmetallation of Zn(II) by Cu(I).....                                                                                  | 112 |
| Figure S 88. Cyclic Voltammogram of [Cu(NNP)(CH <sub>3</sub> CN)][OTf] .....                                                                          | 113 |
| Figure S 89. Cyclic Voltammogram of [Cu(NNP)(CH <sub>3</sub> CN)][PF <sub>6</sub> ] .....                                                             | 114 |
| Figure S 90. Cyclic Voltammogram of [Cu(NNP)I] .....                                                                                                  | 115 |
| Figure S 91. Cyclic Voltammogram of [Cu(NNP)Cl] .....                                                                                                 | 116 |
| Figure S 92. Cyclic Voltammogram of [Cu <sub>2</sub> (NNP) <sub>2</sub> (μ-Cl) <sub>2</sub> ][CuCl <sub>2</sub> ] .....                               | 117 |
| Figure S 93. ORTEP of NNP.....                                                                                                                        | 118 |
| Figure S 94. ORTEP of [Zn(NNP)Cl <sub>2</sub> ] .....                                                                                                 | 119 |

|                                                                                                                                         |     |
|-----------------------------------------------------------------------------------------------------------------------------------------|-----|
| Figure S 95. ORTEP of [Ni(NNP)Cl <sub>2</sub> ]·CH <sub>3</sub> CN.....                                                                 | 120 |
| Figure S 96. ORTEP of [Pd(NNP)Cl][Cl] .....                                                                                             | 121 |
| Figure S 97. ORTEP of [Pd(NNP)(SPhCH <sub>3</sub> )] [PF <sub>6</sub> ] .....                                                           | 122 |
| Figure S 98. ORTEP of [Ru(NNP)(PPh <sub>3</sub> )Cl <sub>2</sub> ] .....                                                                | 123 |
| Figure S 99. ORTEP of <i>anti-rac</i> -[Ru(NNP)(H)Cl(CO)] .....                                                                         | 124 |
| Figure S 100. ORTEP of <i>syn-rac</i> -[Ru(NNP)(H)Cl(CO)] .....                                                                         | 125 |
| Figure S 101. ORTEP of <i>anti-rac</i> -[Ru(NNP)(H)( $\eta^1$ -BH <sub>4</sub> )(CO)] .....                                             | 126 |
| Figure S 102. ORTEP of [Ru(NNP)(CS <sub>2</sub> H) <sub>2</sub> (CO)].....                                                              | 127 |
| Figure S 103. ORTEP of [Cu(NNP)I] .....                                                                                                 | 128 |
| Figure S 104. ORTEP of [Cu(NNP)(PPh <sub>3</sub> )] [BF <sub>4</sub> ].....                                                             | 129 |
| Figure S 105. ORTEP of [Cu(NNP)Cl] .....                                                                                                | 130 |
| Figure S 106. ORTEP of [Cu <sub>2</sub> (NNP) <sub>2</sub> ( $\mu$ -Cl)Cl <sub>2</sub> ] [CuCl <sub>2</sub> ] .....                     | 131 |
| Figure S 108. Cytotoxicity profiles.....                                                                                                | 148 |
| Table S 1. Crystal data and structure refinement for 10febc_0m (NNP) .....                                                              | 132 |
| Table S 2. Crystal data and structure refinement for 27octf [Zn(NNP)Cl <sub>2</sub> ] .....                                             | 133 |
| Table S 3. Crystal data and structure refinement for 26maya_0m [Ni(NNP)Cl <sub>2</sub> ]·CH <sub>3</sub> CN .....                       | 134 |
| Table S 4. Crystal data and structure refinement for 3febd [Pd(NNP)Cl][Cl]. .....                                                       | 135 |
| Table S 5. Crystal data and structure refinement for 1augb_0m [Pd(NNP)(SPhCH <sub>3</sub> )] [PF <sub>6</sub> ]. .....                  | 136 |
| Table S 6. Crystal data and structure refinement for 23dece_0m [Ru(NNP)(PPh <sub>3</sub> )Cl <sub>2</sub> ]. .....                      | 137 |
| Table S 7. Crystal data and structure refinement for 12mayd_0m <i>anti-rac</i> -[Ru(NNP)(H)Cl(CO)]. ..                                  | 138 |
| Table S 8 Crystal data and structure refinement for 5jula_O_0m <i>syn-rac</i> -[Ru(NNP)(H)Cl(CO)]. ....                                 | 139 |
| Table S 9. Crystal data and structure refinement for 31augb_a <i>anti-rac</i> -[Ru(NNP)(H)( $\eta^1$ - BH <sub>4</sub> )(CO)].<br>..... | 140 |
| Table S 10. Crystal data and structure refinement for 9marb_0m [Ru(NNP)(CS <sub>2</sub> H) <sub>2</sub> (CO)].....                      | 141 |
| Table S 11. Crystal data and structure refinement for 25mayb [Cu(NNP)I]. .....                                                          | 142 |
| Table S 12. Crystal data and structure refinement for 13junb [(NNP)Cu(PPh <sub>3</sub> )] [BF <sub>4</sub> ].....                       | 143 |

|                                                                                                                                                    |     |
|----------------------------------------------------------------------------------------------------------------------------------------------------|-----|
| Table S 13. Crystal data and structure refinement for 16maya_0m_a [Cu(NNP)Cl] .....                                                                | 144 |
| Table S 14. Crystal data and structure refinement for 25mayb [Cu <sub>2</sub> (NNP) <sub>2</sub> (μ-Cl)Cl <sub>2</sub> ][CuCl <sub>2</sub> ]. .... | 145 |
| Table S 15. MIC (μg/mL) of metal salts and hydride precursors against <i>S. aureus</i> ATCC29213. ....                                             | 146 |
| Table S 16. MIC (μg/mL) of NNP copper complexes against <i>S. aureus</i> ATCC29213.....                                                            | 147 |

## Experimental Section

### Materials

Pyridine-2-carboxaldehyde (Sigma Aldrich), 2-(diphenylphosphino) benzaldehyde (TCI), *N*-phenylethylenediamine (TCI), formaldehyde (Emplura), 2-methoxyethanol (Spectrochem),  $\text{RuCl}_3 \cdot 3\text{H}_2\text{O}$  (Sigma Aldrich),  $\text{CDCl}_3$  (Merck), anhydrous  $\text{Na}_2\text{SO}_4$  (FINAR),  $\text{CS}_2$  (Fisher Scientific),  $\text{NiCl}_2$  (RANKEM),  $[\text{Pd}(\text{CH}_3\text{CN})_2\text{Cl}_2]$  (TCI),  $\text{ZnCl}_2$  (FINAR),  $\text{CuI}$  (TCI),  $\text{MeI}$  (Sigma- Aldrich), ferrocene (Spectrochem), tetrabutylammonium hexafluorophosphate (TCI) and  $\text{NaBH}_4$  (SRL).

### Methods

Elemental analyses were carried out on a Perkin-Elmer CHNS/O analyser. NMR spectra were recorded on JEOL 500 MHz and JEOL 400 MHz spectrometers. The temperature was kept constant using a variable temperature unit within the error limit of  $\pm 1$  K. The software MestReNova was used to process the NMR spectra. Tetramethylsilane (TMS) or the deuterated solvent residual peaks were used for calibration. Mass spectrometry experiments were performed on an Agilent 6546 LC/Q-TOF equipped with an electrospray interface. Spectra were collected by a constant infusion of the sample dissolved in methanol or acetonitrile with 0.1% formic acid. The freeware mMass was used to simulate the calculated isotopic distributions. UV-Vis spectra were recorded on a Shimadzu UV-2450. Fluorescence spectra were recorded on a HORIBA Fluoromax-4.

### Crystal Structure Determinations

Single-crystal X-ray data were collected at either 293 K or 123 K on a Bruker SMART APEXCCD diffractometer using graphite-monochromated  $\text{Mo K}\alpha$  radiation ( $\lambda = 0.71073 \text{ \AA}$ ). The linear absorption coefficients, the scattering factors for the atoms, and the anomalous dispersion corrections were taken from International Tables for X-ray Crystallography. Data integration and reduction were conducted with SAINT. An empirical absorption correction was applied to the collected reflections with SADABS using XPREP. Structures were determined by a direct method using SHELXTL and refined on F2 by a full-matrix least-squares technique using the SHELXL-97 program package. The lattice parameters and structural data are listed at the end of this Supporting Information.

### Electrochemical studies

Cyclic Voltammetry (CV) analysis was performed on the AUT50405 Autolab electrochemical analyser under  $\text{N}_2$  conditions. The system comprised three electrodes: a

static glassy Carbon working electrode with Ag/AgCl reference electrode, and a Pt wire auxiliary. The supporting electrolyte was 0.1 M tetrabutylammonium hexafluorophosphate (TBAPF<sub>6</sub>).

### Synthesis of *N*<sup>1</sup>-(2-(diphenylphosphaneyl)benzyl)-*N*<sup>2</sup>-phenylethane-1,2-diamine (3)

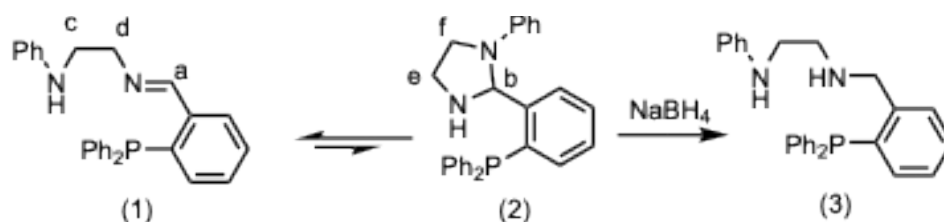

In a 100 mL Schlenk flask, 2-(diphenylphosphino)benzaldehyde (0.551 g, 1.9 mmol) was dissolved in 25 mL of methanol, and *N*-phenylethylenediamine (0.272 g, 2.0 mmol) was added to it. The white suspension was refluxed at 60 °C for 4 h under an N<sub>2</sub> atmosphere. A white precipitate was obtained. The white precipitate was filtered, washed with methanol, and dried under a vacuum. Yield: (0.633 g, 82%, Schiff base: cyclized product = 1:0.4). <sup>1</sup>H NMR of crude product (400 MHz, CDCl<sub>3</sub>) δ = 8.76 (d, *J* = 4.1 Hz, 1H, a), 7.85 (dd, *J* = 7.6, 4.0 Hz, 1H, Ph), 7.43 – 7.37 (m, 3H, Ph), 7.36 – 7.25 (m, 14H, Ph), 7.17 – 7.11 (m, 2H, Ph), 7.04 – 6.99 (m, 0.4H, Ph, cyclized), 6.97 (d, *J* = 7.9 Hz, 0.4H, Ph, cyclized), 6.89 (dd, *J* = 7.6, 4.6 Hz, 1H, Ph), 6.68 (t, *J* = 7.3 Hz, 1H, Ph), 6.58 (t, *J* = 7.3 Hz, 0.5H, Ph, c), 6.53 (d, *J* = 8.5 Hz, 2H, Ph), 6.21 (d, *J* = 8.2 Hz, 1H, Ph), 5.97 (d, *J* = 4.2 Hz, 0.4H, b, cyclized), 3.78 – 3.73 (m, 0.4H, f, cyclized), 3.69 (d, *J* = 5.5 Hz, 2H, d), 3.45 – 3.39 (m, 0.5H, f, cyclized), 3.33 – 3.27 (m, 0.4H, e, cyclized), 3.25 – 3.20 (m, 2.4H, e, c). <sup>31</sup>P NMR (200 MHz, CDCl<sub>3</sub>) δ = -11.13 (s, a), -16.43 (s, b).

Note: The spectrum was recorded for the crude product. Both Schiff base and cyclized forms are present in equilibrium (1:0.4 ratio). Signals assigned to the minor cyclized species are indicated and appear as fractional integrals (0.4H, 0.5H), consistent with the observed 1:0.4 mixture of Schiff base to cyclized product. Where peaks for the two species are merged, combined integrals are reported.

The white precipitate (0.630 g, 1.5 mmol) was dissolved in a mixture of methanol and dichloromethane (20 mL, 1:1). NaBH<sub>4</sub> (0.293 g, 7.5 mmol) was added to it and stirred for 16 h under an N<sub>2</sub> atmosphere. The volatiles were evaporated under reduced pressure. A colorless residue was obtained and dissolved in 20 mL of distilled water. The desired compound was extracted with dichloromethane (4 x 20 mL). The combined organic layer was dried with Na<sub>2</sub>SO<sub>4</sub> and evaporated under reduced pressure, resulting in a yellow oily compound (3). Yield: (0.470 g, 76%). <sup>1</sup>H NMR (500 MHz, CDCl<sub>3</sub>) δ = 7.42 (dd, *J* = 7.2, 4.9 Hz, 1H, Ph), 7.33 (dd,

$J = 12.5, 4.7$  Hz, 8H, Ph), 7.27 (dd,  $J = 7.4, 0.9$  Hz, 3H, Ph), 7.18 – 7.12 (m, 3H, Ph), 6.92 – 6.90 (dd,  $J = 7.0, 5.1$  Hz, 1H, Ph), 6.68 – 6.66 (t,  $J = 7.3$  Hz, 1H, Ph), 6.55 (d,  $J = 7.6$  Hz, 2H, Ph), 3.99 (s, 2H, Bn, benzylic), 3.04 – 3.02 (t, 2H,  $-\text{CH}_2$ ), 2.77 – 2.74 (t, 2H,  $-\text{CH}_2$ ).  $^{13}\text{C}$  NMR (100 MHz,  $\text{CDCl}_3$ )  $\delta = 148.55, 144.47, 144.28, 136.79, 135.97, 129.45, 129.19, 129.08, 128.96, 128.63, 127.49, 117.23, 52.25, 47.91, 43.34$ .  $^{31}\text{P}$  NMR (200 MHz,  $\text{CDCl}_3$ )  $\delta = -15.45$  (s).

### Synthesis of NNP ligand

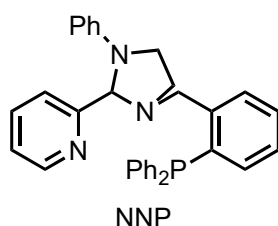

In a 100 mL Schlenk flask, 2-pyridinecarboxaldehyde (0.117 g, 1.1 mmol) was dissolved in 10 mL methanol.  $N^1$ -(2-(diphenylphosphaneyl)benzyl)- $N^2$ -phenylethane-1,2-diamine (0.460 g, 1.1 mmol) was dissolved in 10 mL of methanol and added dropwise. The resulting yellow solution was stirred for 15 h under an  $\text{N}_2$  atmosphere. All volatiles were evaporated under reduced pressure. A white precipitate was obtained, which was dried under a vacuum. XRD quality crystals were formed by slow diffusion of diethyl ether into a concentrated chloroform solution of NNP at 5 °C after 2 days. Yield: (0.38 g, 69%).  $^1\text{H}$  NMR (500 MHz,  $\text{CDCl}_3$ )  $\delta = 8.57$  (d,  $J = 6.5$  Hz, 1H, Ph), 7.58 – 7.55 (m, 1H, Ph), 7.34 – 7.31 (m, 1H, Ph), 7.25 – 7.04 (m, 16H, Ph), 6.89 (dd,  $J = 8.1, 3.7$  Hz, 1H, Ph), 6.61 (t,  $J = 6.8$  Hz, 1H, Ph), 6.37 (d,  $J = 8.5$  Hz, 2H, Ph), 5.10 (s, 1H,  $\text{C}^*\text{H}$ , stereogenic chiral carbon), 4.03 (d,  $J = 15.4$  Hz, 1H, Bn), 3.78 (d,  $J = 13.2$  Hz, 1H, Bn), 3.39 – 3.35 (d,  $J = 6.3$  Hz, 1H,  $\text{CH}_2\text{-Im}$ ), 2.98 – 2.92 (m, 2H,  $\text{CH}_2\text{-Im}$ ), 2.63 – 2.60 (m, 1H,  $\text{CH}_2\text{-Im}$ , imidazolidinyl proton).  $^{13}\text{C}$  NMR (100 MHz,  $\text{CDCl}_3$ )  $\delta = 160.86, 148.69, 146.00, 143.63, 138.01, 136.87, 136.65, 134.40, 133.79, 133.46, 129.37, 129.33, 128.89, 128.67, 127.38, 122.89, 122.44, 116.41, 112.39, 82.08, 54.69, 49.32, 47.07$ .  $^{31}\text{P}$  NMR (200 MHz,  $\text{CDCl}_3$ )  $\delta = -15.21$  (s). High resolution ESI-MS:  $m/z$  for  $[\text{M}+\text{H}]^+ = 500.2274$  (calcd. 500.2256) =  $[\text{C}_{33}\text{H}_{31}\text{N}_3\text{P}]^+$ .

### Synthesis of [Zn(NNP)Cl<sub>2</sub>] complex

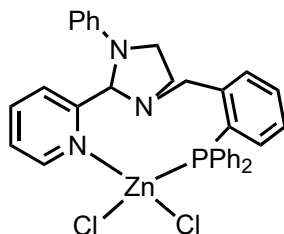

In a 50 mL Schlenk flask, anhydrous zinc (II) chloride (0.013 g, 0.1 mmol) was dissolved in 3 mL methanol. NNP (0.054 g, 0.1 mmol) was dissolved in 4 mL methanol and 1 mL dichloromethane and added dropwise to the zinc (II) chloride solution. A white precipitate appeared after 5 minutes. The reaction mixture was stirred for 3 h under an N<sub>2</sub> atmosphere. All volatiles were evaporated under reduced pressure. A white precipitate was obtained, washed with diethyl ether, and dried under a vacuum. XRD quality crystals were formed by slow diffusion of diethyl ether into a concentrated dichloromethane solution of [Zn(NNP)Cl<sub>2</sub>] at 5 °C after 3 days. Yield: (0.06 g, 94%). <sup>1</sup>H NMR (400 MHz, CDCl<sub>3</sub>) δ = 9.54 (d, *J* = 5.3 Hz, 1H, Ph), 7.76 (t, *J* = 7.7 Hz, 1H, Ph), 7.54 – 7.36 (m, 8H, Ph), 7.30 – 7.22 (m, 9H, Ph), 7.08 (t, *J* = 8.1 Hz, 1H, Ph), 6.83 (t, *J* = 7.3 Hz, 1H, Ph), 6.61 (d, *J* = 8.1 Hz, 2H, Ph), 6.19 (s, 1H, C\*H), 5.22 (d, *J* = 13.5 Hz, 1H, Bn), 3.79 – 3.65 (m, 2H, Bn, CH<sub>2</sub>-Im), 3.28 (t, *J* = 8.2 Hz, 1H, CH<sub>2</sub>-Im), 2.86 (dd, *J* = 13.1, 6.7 Hz, 1H, CH<sub>2</sub>-Im), 2.28 – 2.16 (m, 1H, CH<sub>2</sub>-Im). <sup>13</sup>C NMR (100 MHz, CDCl<sub>3</sub>) δ = 157.13, 150.81, 146.21, 140.39, 136.67, 134.18, 133.66, 131.53, 130.65, 130.42, 129.90, 129.06, 128.97, 128.70, 128.60, 124.55, 123.26, 118.19, 111.71, 81.78, 57.73, 47.93, 43.49. <sup>31</sup>P NMR (200 MHz, CDCl<sub>3</sub>) δ = -13.85 (s). Elemental analysis calculated (%) for C<sub>33</sub>H<sub>30</sub>Cl<sub>2</sub>N<sub>3</sub>PZn: C, 62.33; H, 4.76; N, 6.61. Found: C, 62.35; H, 4.49; N, 6.62. High resolution ESI-MS: *m/z* for [M-Cl]<sup>+</sup> = 598.1149 (calcd. 598.1157) = [ZnC<sub>33</sub>H<sub>30</sub>N<sub>3</sub>PCl]<sup>+</sup>, [NNP+H]<sup>+</sup> = 500.2268 (calcd. 500.2256) = [C<sub>33</sub>H<sub>31</sub>N<sub>3</sub>P]<sup>+</sup>.

### Synthesis of [Ni(NNP)Cl<sub>2</sub>]·CH<sub>3</sub>CN complex

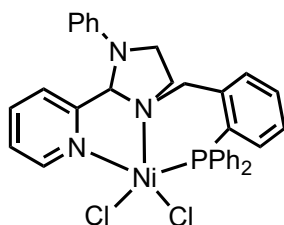

In a 50 mL Schlenk flask, anhydrous nickel (II) chloride (0.012 g, 0.1 mmol) and NNP (0.05 g, 0.1 mmol) were dissolved in 5 mL dry acetonitrile. The reaction mixture was stirred for 3 h at room temperature under an N<sub>2</sub> atmosphere. The color of the solution turned green. The solvent



was evaporated under reduced pressure. A green residue was washed with diethyl ether and dried under a vacuum. XRD quality crystals were obtained by dissolving the complex in acetonitrile at room temperature after 1 day. Yield: (0.062 g, 96%). High resolution ESI-MS:  $m/z$  for  $[M-Cl]^+ = 592.1221$  (calcd. 592.1219) =  $[NiC_{33}H_{30}N_3ClP]^+$ . Elemental analysis calculated (%) for  $C_{33}H_{30}Cl_2N_3PNi + (1 CH_3CN)$ : C, 62.72; H, 4.96; N, 8.36. Found: C, 62.77; H, 4.88; N, 8.66.

### Synthesis of $[Pd(NNP)Cl][Cl]$ complex

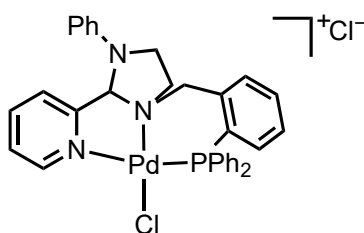

In a 50 mL Schlenk flask, bis-acetonitrile palladium (II) chloride (0.008 g, 0.05 mmol) was dissolved in 2 mL dichloromethane. NNP (0.025 g, 0.05 mmol) was dissolved in 3 mL dichloromethane and added dropwise. The reaction mixture was stirred for 3 h under an  $N_2$  atmosphere. The solvent was evaporated under reduced pressure. A yellow residue was obtained, washed with diethyl ether, and dried under a vacuum. XRD quality crystals were formed by slow diffusion of diethyl ether into a concentrated dichloromethane solution of  $[Pd(NNP)Cl][Cl]$  at 5 °C after 2 days. Yield: (0.03 g, 96%).  $^1H$  NMR (500 MHz,  $CDCl_3$ )  $\delta$  = 9.05 (t,  $J$  = 3.9 Hz, 1H, Ph), 8.02 (t,  $J$  = 8.5 Hz, 2H, Ph), 7.89 (dd,  $J$  = 12.0, 7.9 Hz, 1H, Ph), 7.71 – 7.59 (m, 6H, Ph), 7.53 (d,  $J$  = 5.6 Hz, 6H, Ph), 7.46 (d,  $J$  = 7.5 Hz, 1H, Ph), 7.39 (dd,  $J$  = 8.5, 7.5 Hz, 2H, Ph), 7.08 (d,  $J$  = 25.4 Hz, 1H, Ph), 7.02 (d,  $J$  = 8.1 Hz, 2H, Ph), 6.95 (d,  $J$  = 7.4 Hz, 1H, C\*H), 4.81 (d,  $J$  = 13.3 Hz, 1H, Bn), 3.94 (t,  $J$  = 8.7 Hz, 1H,  $CH_2$ -Im), 3.80 (ddd,  $J$  = 21.5, 11.8, 7.7 Hz, 2H,  $CH_2$ -Im, Bn), 3.66 (dd,  $J$  = 20.0, 11.6 Hz, 1H,  $CH_2$ -Im), 3.54 – 3.48 (m, 1H,  $CH_2$ -Im).  $^{13}C$  NMR (100 MHz,  $CDCl_3$ )  $\delta$  = 158.52, 148.42, 146.04, 141.65, 137.52, 135.01, 134.27, 134.03, 132.95, 132.41, 131.44, 130.40, 129.78, 129.18, 127.05, 126.52, 124.88, 120.12, 112.47, 87.98, 60.05, 52.87, 44.22.  $^{31}P$  NMR (200 MHz,  $CDCl_3$ )  $\delta$  = 24.07 (s). Elemental analysis calculated (%) for  $C_{33}H_{30}Cl_2N_3PPd \cdot 0.8CH_2Cl_2$ : C, 54.50; H, 4.28; N, 5.64. Found: C, 54.59; H, 4.74; N, 5.55. High resolution ESI-MS:  $m/z$  for  $[M-Cl]^+ = 640.0891$  (calcd. 640.0901) =  $[PdC_{33}H_{30}ClN_3P]^+$ .

### Synthesis of [Pd(NNP)(SPhCH<sub>3</sub>)]<sup>+</sup>[Cl]<sup>-</sup>

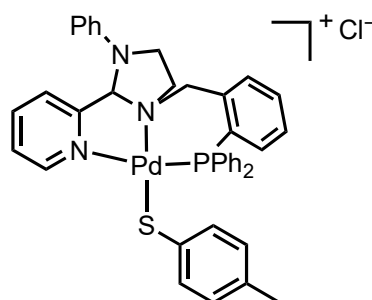

In a 50 mL round bottom flask, *p*-Toluenethiol (0.011 g, 0.096 mmol) was dissolved in 5 mL methanol, and a few drops of triethylamine were added, stirred for 5 minutes. Then [Pd(NNP)Cl]<sup>+</sup>[Cl]<sup>-</sup> (0.065 g, 0.096 mmol) was added to it. The orange color reaction mixture was stirred for 6 h at room temperature. The desired compound was extracted with dichloromethane and water. The combined organic layer was dried with Na<sub>2</sub>SO<sub>4</sub> and evaporated under reduced pressure, resulting in the orange solid compound. Yield = (0.072 g, 98%). <sup>1</sup>H NMR (400 MHz, CDCl<sub>3</sub>) δ = 8.80 (s, 1H, Ph), 7.91 – 7.84 (m, 3H, Ph), 7.60 – 7.55 (m, 1H, Ph), 7.52 (d, *J* = 4.3 Hz, 4H, Ph), 7.48 – 7.42 (m, 4H, Ph), 7.38 (d, *J* = 8.4 Hz, 9H, Ph), 7.06 (d, *J* = 8.5 Hz, 3H, Ph), 6.94 (t, *J* = 7.3 Hz, 1H, Ph), 6.77 (d, *J* = 8.1 Hz, 2H, C<sup>\*</sup>H, Ph), 5.18 (d, *J* = 13.2 Hz, 1H, Bn), 3.84 – 3.73 (m, 3H, Bn, CH<sub>2</sub>-Im), 3.41 – 3.34 (m, 2H, CH<sub>2</sub>-Im), 2.16 (s, 3H, CH<sub>3</sub>). <sup>13</sup>C NMR (100 MHz, CDCl<sub>3</sub>) δ = 159.54, 149.65, 146.30, 140.84, 138.50, 137.48, 135.07, 134.46, 133.90, 133.49, 133.20, 132.12, 131.68, 130.92, 130.31, 129.65, 129.16, 129.128.90, 125.56, 124.87, 119.72, 112.53, 86.38 (C<sup>\*</sup>H), 59.57, 51.18, 44.07, 29.81 (grease), 20.94 (CH<sub>3</sub>). <sup>31</sup>P NMR (200 MHz, CDCl<sub>3</sub>) δ = 27.44 (s). High resolution ESI-MS: *m/z* for [M-Cl]<sup>+</sup> = 728.1477 (calcd. 728.1481) = [PdC<sub>40</sub>H<sub>37</sub>N<sub>3</sub>SP]<sup>+</sup>.

### Synthesis of [Pd(NNP)(SPhCH<sub>3</sub>)]<sup>+</sup>[PF<sub>6</sub>]<sup>-</sup>

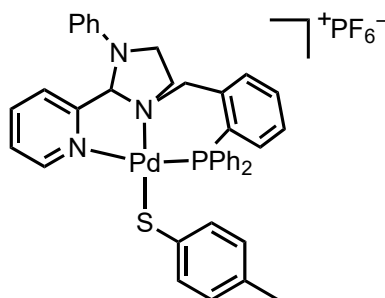

In a 50 mL round-bottom flask,  $[\text{Pd}(\text{NNP})(\text{SPhCH}_3)][\text{Cl}]$  (0.072 g, 0.08 mmol) was dissolved in 5 mL of methanol, a few drops of triethylamine were added and stirred for 5 minutes. Then  $\text{KPF}_6$  (0.014 g, 0.08 mmol) was added to it. The orange color reaction mixture was stirred for 6 h at room temperature. The solvent evaporated under reduced pressure, resulting in the orange solid compound. XRD quality crystals were formed by slow diffusion of diethyl ether into a concentrated chloroform solution of  $[\text{Pd}(\text{NNP})(\text{SPhCH}_3)][\text{PF}_6]$  at 5 °C after 4 days. Yield: (0.068 g, 97%).  $^1\text{H}$  NMR (400 MHz,  $\text{CDCl}_3$ )  $\delta$  = 8.84 (d,  $J$  = 5.8 Hz, 1H, Ph), 7.90 (t,  $J$  = 7.7 Hz, 1H, Ph), 7.79 (dd,  $J$  = 12.4, 7.4 Hz, 2H, Ph), 7.61 (d,  $J$  = 7.6 Hz, 1H, Ph), 7.55 (t,  $J$  = 7.4 Hz, 2H, Ph), 7.47 (dd,  $J$  = 7.1, 4.0 Hz, 4H, Ph), 7.36 (dd,  $J$  = 16.1, 7.5 Hz, 8H, Ph), 7.18 (d,  $J$  = 8.1 Hz, 2H, Ph), 7.07 – 7.02 (m, 1H, Ph), 6.98 – 6.92 (m, 3H, Ph), 6.76 (d,  $J$  = 8.1 Hz, 2H, Ph), 6.43 (s, 1H, C\*H), 4.58 (d,  $J$  = 13.0 Hz, 1H, Bn), 3.81 (dd,  $J$  = 13.0, 5.9 Hz, 1H, Bn), 3.76 – 3.70 (m, 1H,  $\text{CH}_2$ ), 3.67 – 3.60 (m, 1H,  $\text{CH}_2$ ), 3.35 (dd,  $J$  = 8.7, 5.0 Hz, 2H,  $\text{CH}_2$ ), 2.17 (s, 3H,  $\text{CH}_3$ ).  $^{31}\text{P}$  NMR (200 MHz,  $\text{CDCl}_3$ )  $\delta$  = 27.66 (s), (–137.22) – (–151.06) (quintet).

### Synthesis of $[\text{Ru}(\text{NNP})(\text{PPh}_3)\text{Cl}_2]$ complex

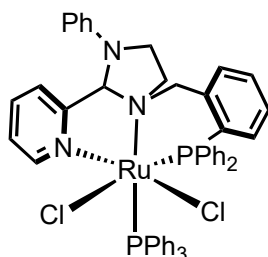

- In a 50 mL Schlenk flask,  $[\text{RuCl}_2(\text{PPh}_3)_3]$  (0.038 g, 0.04 mmol) was dissolved in 3 mL dichloromethane. NNP (0.020 g, 0.04 mmol) was dissolved in 2 mL of methanol and added dropwise to the  $[\text{RuCl}_2(\text{PPh}_3)_3]$  solution under an  $\text{N}_2$  atmosphere. A yellow precipitate was formed after 5 minutes. The reaction mixture was stirred for 3 h under an  $\text{N}_2$  atmosphere. The solvent was evaporated under reduced pressure. The yellow solid was washed with diethyl ether and dried under a vacuum. XRD quality crystals were formed by slow diffusion of diethyl ether into a concentrated chloroform solution of  $[\text{Ru}(\text{NNP})(\text{PPh}_3)\text{Cl}_2]$  at 5 °C after 2 days. Yield: (0.035 g, 93%).  $^1\text{H}$  NMR (500 MHz,  $\text{CDCl}_3$ )  $\delta$  = 9.00 – 8.89 (m, 1H, Ph), 8.42 (s, 1H, C\*H), 8.24 (d,  $J$  = 5.5 Hz, 1H, Ph), 7.47 (t,  $J$  = 7.3 Hz, 1H, Ph), 7.38 (s, 3H, Ph), 7.30 (t,  $J$  = 7.9 Hz, 3H, Ph), 7.26 – 7.11 (m, 10H, Ph), 7.09 – 6.96 (m, 9H, Ph), 6.91 (t,  $J$  = 7.0 Hz, 4H, Ph), 6.74 (t,  $J$  = 7.0 Hz, 3H, Ph), 6.52 (t,  $J$  = 8.7 Hz, 1H, Ph), 6.37 – 6.32 (m, 1H, Ph), 6.23 (t,  $J$  = 6.4 Hz, 1H, Ph), 4.51 (dt,  $J$  = 9.7, 6.8 Hz, 1H, Bn), 4.38 (dt,  $J$  = 12.8, 4.5 Hz, 1H, Bn), 4.09 (q,  $J$  =

10.4 Hz, 1H, CH<sub>2</sub>-Im), 3.52 (d,  $J$  = 9.1 Hz, 1H, CH<sub>2</sub>-Im), 3.24 (dd,  $J$  = 12.6, 6.3 Hz, 1H, CH<sub>2</sub>-Im), 3.11 (d,  $J$  = 12.9 Hz, 1H, CH<sub>2</sub>-Im). <sup>31</sup>P NMR (200 MHz, CDCl<sub>3</sub>)  $\delta$  = 46.64, 46.48, 42.78, 42.61. Elemental analysis calculated (%) for C<sub>51</sub>H<sub>45</sub>Cl<sub>2</sub>N<sub>3</sub>P<sub>2</sub>Ru·0.6 CH<sub>2</sub>Cl<sub>2</sub>: C, 63.93; H, 4.73; N, 4.27. Found: C, 63.97; H, 4.72; N, 4.48. High resolution ESI-MS:  $m/z$  for [M-Cl]<sup>+</sup> = 898.1814 (calcd. 898.1821) = [RuC<sub>51</sub>H<sub>45</sub>ClN<sub>3</sub>P<sub>2</sub>]<sup>+</sup>;  $m/z$  = 636.0896 (calcd. 636.0909) = [M-(PPh<sub>3</sub>+Cl)]<sup>+</sup>;  $m/z$  = 516.2188 (calcd. 516.2205) = [NNP=O+H]<sup>+</sup>;  $m/z$  = 263.0976 (calcd. 263.0990) = [PPh<sub>3</sub>+H]<sup>+</sup>;  $m/z$  = 938.2200 (calcd. 938.2214) = [Ru(NNP)(O=PPh<sub>3</sub>)-2Cl+CH<sub>3</sub>COO]<sup>+</sup>. The CH<sub>3</sub>COO<sup>-</sup> likely originates from the formic acid used to infuse the sample during measurement.

## Synthesis of [Ru(NNP)(H)Cl(CO)] complex

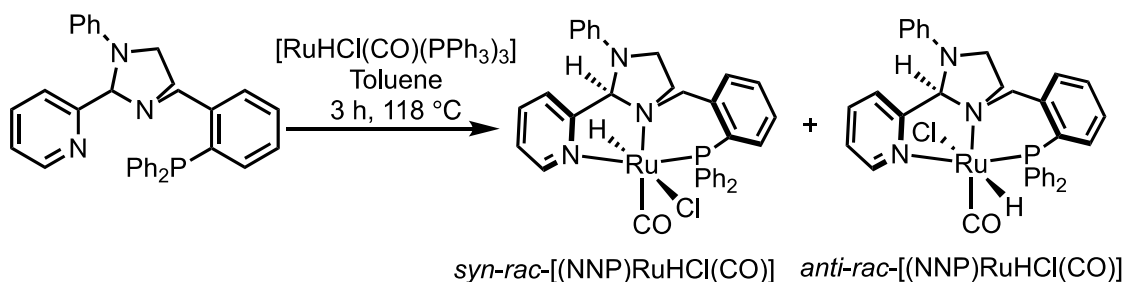

In a 50 mL Schlenk flask, NNP (0.100 g, 0.20 mmol) and [Ru(H)Cl(CO)(PPh<sub>3</sub>)<sub>3</sub>] (0.190 g, 0.20 mmol) were dissolved in dry toluene (5 mL) and refluxed for 3 h under N<sub>2</sub> atmosphere at 118 °C. The reaction mixture was filtered via cannula. The solid residue was washed several times with diethyl ether and dried under vacuum to afford *anti-rac*-[Ru(NNP)(H)(CO)Cl] as a white solid (0.061 g, 45%). Single crystals suitable for X-ray diffraction were obtained by slow diffusion of diethyl ether into a concentrated dichloromethane solution at 5 °C after 2 days.

The yellow filtrate was concentrated, and diethyl ether was added to induce precipitation. The resulting solid was collected and dried under vacuum to afford *syn-rac*-[Ru(NNP)(H)(CO)Cl] as a white solid (0.054 g, 40%). Single crystals suitable for X-ray diffraction were obtained by slow diffusion of diethyl ether into a concentrated dichloromethane solution at room temperature over one week.

***anti-rac*-[Ru(NNP)(H)(CO)Cl]:** <sup>1</sup>H NMR (500 MHz, CDCl<sub>3</sub>) δ = 9.00 (d, *J* = 5.4 Hz, 1H, Ph), 7.67 (td, *J* = 7.8, 1.5 Hz, 1H, Ph), 7.55 (dd, *J* = 10.7, 7.6 Hz, 2H, Ph), 7.38 (t, *J* = 11.4 Hz, 12H, Ph), 7.32 (d, *J* = 7.5 Hz, 2H, Ph), 7.23 (d, *J* = 6.6 Hz, 1H, Ph), 6.95 (t, *J* = 8.0 Hz, 1H, Ph), 6.88 (t, *J* = 7.3 Hz, 1H, Ph), 6.82 (d, *J* = 8.2 Hz, 2H, Ph), 6.76 (s, 1H, C\*H), 5.38 (d, *J* = 12.6 Hz, 1H, Bn), 3.55 – 3.49 (m, 1H, CH<sub>2</sub>-Im), 3.44 (dd, *J* = 12.6, 4.2 Hz, 1H, CH<sub>2</sub>-Im), 3.34 (t, *J* = 8.3 Hz, 1H, CH<sub>2</sub>-Im), 3.21 (dd, *J* = 13.1, 6.6 Hz, 1H, Bn), 3.13 – 3.05 (m, 1H, CH<sub>2</sub>-Im), –13.77 (d, *J* = 25.3 Hz, 1H, Ru-H). <sup>31</sup>P NMR (200 MHz, CDCl<sub>3</sub>) δ = 66.61 (d, *J* = 17.1 Hz).

***syn-rac*-[Ru(NNP)(H)(CO)Cl]:** <sup>1</sup>H NMR (500 MHz, CDCl<sub>3</sub>) δ = 9.08 – 9.04 (m, 1H, Ph), 7.67 (td, *J* = 7.8, 1.6 Hz, 1H, Ph), 7.48 – 7.28 (m, 15H, Ph), 7.25 (t, *J* = 4.6 Hz, 1H, Ph), 7.00 – 6.94 (m, 1H, Ph), 6.89 (t, *J* = 7.3 Hz, 1H, Ph), 6.76 (d, *J* = 8.1 Hz, 2H, Ph), 5.87 (s, 1H, C\*H), 4.40 (d, *J* = 11.9 Hz, 1H, Bn), 3.77 (dd, *J* = 12.0, 4.5 Hz, 1H, Bn), 3.69 – 3.62 (m, 1H, CH<sub>2</sub>-Im), 3.51 – 3.39 (m, 1H, CH<sub>2</sub>-Im), 3.31 (t, *J* = 8.4 Hz, 1H, CH<sub>2</sub>-Im), 2.89 (d, *J* = 7.4 Hz, 1H, CH<sub>2</sub>-

Im),  $-13.89$  (d,  $J = 26.1$  Hz, 1H, RuH).  $^{31}\text{P}$  NMR (202 MHz,  $\text{CDCl}_3$ )  $\delta = 57.06$  (d,  $J = 20.8$  Hz).

Elemental analysis calculated (%) for  $\text{C}_{34}\text{H}_{31}\text{ClN}_3\text{OPRu} \cdot 0.5\text{CH}_2\text{Cl}_2$ : C, 58.56; H, 4.56; N, 5.94. Found: C, 58.77; H, 4.96; N, 5.79. High resolution ESI-MS:  $m/z$  for  $[\text{M}-\text{Cl}]^+ = 630.1234$  (calcd. 630.1248) =  $[\text{RuC}_{34}\text{H}_{31}\text{N}_3\text{OP}]^+$ . FT-IR (KBr pellet)  $[\text{Ru}(\text{H})\text{Cl}(\text{CO})(\text{PPh}_3)_3]$ :  $\nu_{\text{Ru-H}} = 2014\text{ cm}^{-1}$ ,  $\nu_{\text{CO}} = 1923\text{ cm}^{-1}$ . FT-IR (KBr pellet) *syn-rac*- $[\text{Ru}(\text{NNP})(\text{H})(\text{CO})\text{Cl}]$ :  $\nu_{\text{Ru-H}} = 1989\text{ cm}^{-1}$ ,  $\nu_{\text{CO}} = 1914\text{ cm}^{-1}$ . FT-IR (KBr pellet) *anti-rac*- $[\text{Ru}(\text{NNP})(\text{H})(\text{CO})\text{Cl}]$ :  $\nu_{\text{Ru-H}} = 1999\text{ cm}^{-1}$ ,  $\nu_{\text{CO}} = 1913\text{ cm}^{-1}$ .

### Synthesis of *anti-rac*- $[\text{Ru}(\text{NNP})(\text{H})(\eta^1\text{-BH}_4)(\text{CO})]$ complex

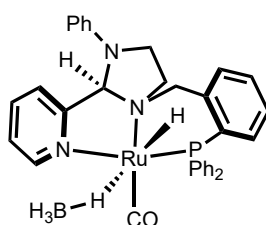

In a 50 mL Schlenk flask, *anti-rac*- $[\text{Ru}(\text{NNP})(\text{H})\text{Cl}(\text{CO})]$  (0.02 g, 0.03 mmol) was dissolved in 3 mL dichloromethane.  $\text{NaBH}_4$  (0.011 g, 0.30 mmol) was dissolved in 2 mL of ethanol and added dropwise to the *anti-rac*- $[\text{Ru}(\text{NNP})(\text{H})\text{Cl}(\text{CO})]$  solution. The reaction mixture was stirred under an  $\text{N}_2$  atmosphere for 12 h. The solvent was evaporated under reduced pressure. Then, it was dissolved in dichloromethane and passed through celite to get a clear solution. The solvent was evaporated to get the white solid compound. XRD quality crystals were formed by slow diffusion of diethyl ether into a concentrated dichloromethane solution of *anti-rac*- $[\text{Ru}(\text{NNP})(\text{H})(\eta^1\text{-BH}_4)(\text{CO})]$  at  $5^\circ\text{C}$  after 3 days. Yield: (0.018 g, 93%).  $^1\text{H}$  NMR (400 MHz,  $\text{CDCl}_3$ )  $\delta = 8.96$  (d,  $J = 5.4$  Hz, 1H, Ph), 7.67 (t,  $J = 7.4$  Hz, 2H, Ph), 7.57 – 7.52 (m, 2H, Ph), 7.42 (m, 4H, Ph), 7.38 (m, 6H, Ph), 7.31 (m,  $J = 12.5$  Hz, 3H, Ph), 7.00 (d,  $J = 8.7$  Hz, 1H, Ph), 6.88 (t,  $J = 7.3$  Hz, 1H, Ph), 6.81 (d,  $J = 8.2$  Hz, 2H, Ph), 6.53 (s, 1H, C\*H), 4.82 (d,  $J = 12.5$  Hz, 1H, Bn), 3.61 (dd,  $J = 12.6, 4.3$  Hz, 1H, Bn), 3.51 (m, 1H,  $\text{CH}_2\text{-Im}$ ), 3.34 – 3.28 (m, 1H,  $\text{CH}_2\text{-Im}$ ), 3.16 (d,  $J = 13.1$  Hz, 1H,  $\text{CH}_2\text{-Im}$ ), 3.03 (dd,  $J = 14.5, 10.1$  Hz, 1H,  $\text{CH}_2\text{-Im}$ ),  $-1.56$  (s, 4H,  $\text{-BH}_4$ ),  $-11.86$  (d,  $J = 24.0$  Hz, 1H, Ru-H).  $^{31}\text{P}$  NMR (200 MHz,  $\text{CDCl}_3$ )  $\delta = 63.67$  (s). High resolution ESI-MS:  $m/z$  for  $[\text{M}-\text{BH}_4]^+ = 630.1249$  (calcd. 630.1248) =  $[\text{RuC}_{34}\text{H}_{31}\text{N}_3\text{OP}]^+$ .

## Reactivity of *anti-rac*-[Ru(NNP)(H)( $\eta^1$ -BH<sub>4</sub>)(CO)] with CS<sub>2</sub>

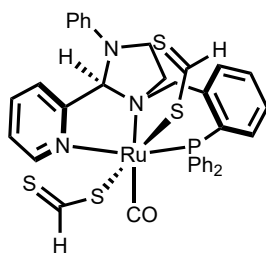

In a 50 mL Schlenk flask, *anti-rac*-[Ru(NNP)(H)( $\eta^1$ -BH<sub>4</sub>)(CO)] (0.02 g, 0.03 mmol) was dissolved in 10 mL dichloromethane and ethanol. Then, CS<sub>2</sub> (0.5 mL) was added to the same reaction mixture. The color of the solution immediately turned yellow. A yellow color precipitate was formed within 5 min. The reaction mixture was stirred for 3 h under an N<sub>2</sub> atmosphere. The solvent was evaporated under reduced pressure, and the yellow residue was redissolved in dichloromethane and passed through celite. The solvent was evaporated to get a yellow color precipitate, which was dried under a vacuum. XRD quality crystals were formed by slow diffusion of diethyl ether into a concentrated dichloromethane solution of [Ru(NNP)(CO)(CS<sub>2</sub>H)<sub>2</sub>] at 5 °C after 2 days. Yield: (0.018 g, 76%). <sup>1</sup>H NMR (400 MHz, CDCl<sub>3</sub>)  $\delta$  = 11.43 (s, 1H, -CS<sub>2</sub>H), 11.05 (s, 1H, -CS<sub>2</sub>H), 9.36 (s, 1H, Ph), 7.73 (t, *J* = 6.0 Hz, 2H, Ph), 7.56 (m, 1H, Ph), 7.48 (m, 1H, Ph), 7.41 (m, 5H, Ph), 7.32 (m, 2H, Ph), 7.18 (m, 2H, Ph), 7.00 (m, 2H, Ph), 6.94 (m, 2H, Ph), 6.73 (d, *J* = 8.2 Hz, 2H, Ph), 6.47 (s, 1H, C\*H), 4.65 (d, *J* = 12.8 Hz, 1H, Bn), 3.70 (d, *J* = 3.6 Hz, 1H, Bn), 3.43 (m, 1H, CH<sub>2</sub>-Im), 3.18 – 3.10 (m, 2H, CH<sub>2</sub>-Im), 3.06 – 3.00 (m, 1H, CH<sub>2</sub>-Im). <sup>31</sup>P NMR (200 MHz, CDCl<sub>3</sub>)  $\delta$  = 50.23 (s). High resolution ESI-MS: *m/z* for = [M-CS<sub>2</sub>H]<sup>+</sup> = 706.0686 (calcd. 706.0690) = [RuC<sub>35</sub>H<sub>31</sub>N<sub>3</sub>OPS<sub>2</sub>]<sup>+</sup>; *m/z* = 798.0446 (calcd. 798.0080) = [Ru(NNP=O)(CS<sub>2</sub>H)(CS<sub>2</sub>)]<sup>+</sup>. FT-IR (KBr pellet) [Ru(NNP)(CO)(CS<sub>2</sub>H)<sub>2</sub>]:  $\nu_{\text{C-H}}$  = 2930-2920 cm<sup>-1</sup>,  $\nu_{\text{CO}}$  = 1977 cm<sup>-1</sup>,  $\nu_{\text{S-C-S}}$  = 996 cm<sup>-1</sup>,  $\nu_{\text{C=S}}$  = 692 cm<sup>-1</sup>.

## Reaction of [Ru(NNP)(CO)(CS<sub>2</sub>H)<sub>2</sub>] with MeI

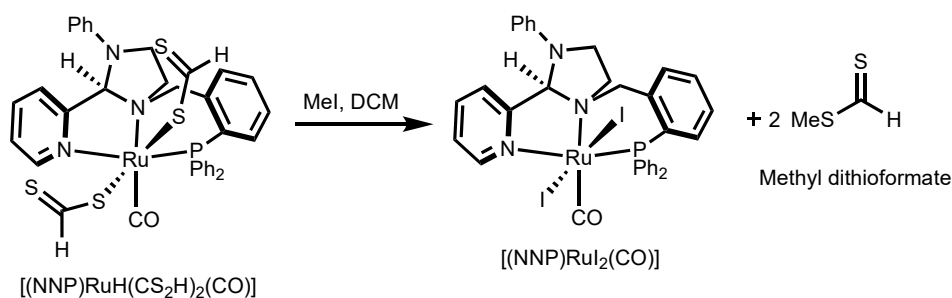

In a 50 mL round-bottom flask, [Ru(NNP)(CO)(CS<sub>2</sub>H<sub>2</sub>)] (0.01 g, 0.01 mmol) was dissolved in 5 mL dichloromethane, and MeI (0.018 g, 0.10 mmol) was added to it. The color of the reaction mixture was changed from yellow to orange within 5 minutes. The reaction mixture was stirred for 2 h at room temperature. The solvent was evaporated, and orange color compound was dried under vacuum. <sup>31</sup>P NMR (200 MHz, CDCl<sub>3</sub>) δ = 46.39 (s). High resolution ESI-MS: *m/z* for [M-I]<sup>+</sup> = 756.0218 (calcd. 756.0215) = [RuC<sub>34</sub>H<sub>30</sub>N<sub>3</sub>OPI]<sup>+</sup>.

### Synthesis of [Cu(NNP)I] complex

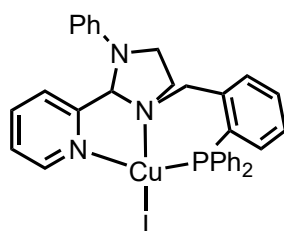

In a 50 mL Schlenk flask, CuI (0.009 g, 0.05 mmol) and NNP (0.025 g, 0.05 mmol) were dissolved in 4 mL dry acetonitrile under N<sub>2</sub> atm. The pale-yellow reaction mixture was stirred for 3 h at room temperature under N<sub>2</sub> atm. The solvent was evaporated under reduced pressure. A pale-yellow solid compound was obtained. XRD quality crystals were formed by slow diffusion of diethyl ether into a concentrated acetonitrile solution of [Cu(NNP)I] at 5 °C after 2 days. Yield: (0.034 g, 98%). <sup>1</sup>H NMR (500 MHz, CDCl<sub>3</sub>) δ = 8.95 (d, *J* = 4.6 Hz, 1H, Ph), 7.85 – 7.80 (m, 2H, Ph), 7.65 (t, *J* = 7.7 Hz, 1H, Ph), 7.44 (d, *J* = 1.7 Hz, 4H, Ph), 7.36 (d, *J* = 9.9 Hz, 5H, Ph), 7.28 – 7.16 (m, 6H, Ph), 6.93 (t, *J* = 8.5 Hz, 1H, Ph), 6.84 (d, *J* = 7.3 Hz, 1H, Ph), 6.79 – 6.76 (m, 1H, Ph), 6.55 (d, *J* = 8.0 Hz, 2H, Ph), 5.27 (s, 1H, C\*H), 4.12 (d, *J* = 12.2 Hz, 1H, Bn), 3.80 (dd, *J* = 17.8, 8.2 Hz, 1H, Bn), 3.69 (dd, *J* = 21.5, 9.7 Hz, 1H, CH<sub>2</sub>-Im), 3.51 (d, *J* = 12.3 Hz, 1H, CH<sub>2</sub>-Im), 3.46 (t, *J* = 7.8 Hz, 1H, CH<sub>2</sub>-Im), 3.37 (dd, *J* = 13.0, 6.6 Hz, 1H, CH<sub>2</sub>-Im). <sup>31</sup>P NMR (200 MHz, CDCl<sub>3</sub>) δ = -13.08 (s). High resolution ESI-MS: *m/z* for [M-I]<sup>+</sup> = 562.1472 (calcd. 562.1473) = [CuC<sub>33</sub>H<sub>30</sub>N<sub>3</sub>P]<sup>+</sup>; *m/z* = 1253.1977 (calcd. 1253.1973) = Cu<sub>2</sub>(NNP)<sub>2</sub>I]<sup>+</sup>; *m/z* = 500.2249 (calcd. 500.2256) = [NNP+H]<sup>+</sup>.

### Synthesis of [Cu(NNP)Cl]



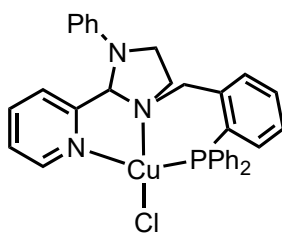

In a 50 mL Schlenk flask, CuCl (0.006 g, 0.05 mmol) and NNP (0.025 g, 0.05 mmol) were dissolved in 5 mL of CH<sub>3</sub>CN under N<sub>2</sub> atm. The yellow reaction mixture was stirred for 5 h at room temperature under N<sub>2</sub> atm. The solvent was evaporated under reduced pressure and dried under vacuum. A yellow color solid compound was obtained. XRD-quality crystals were formed by slow diffusion of diethyl ether into a concentrated acetonitrile solution of [Cu(NNP)Cl] after 2 weeks. Yield: (0.03 g, 100%). <sup>1</sup>H NMR (400 MHz, CDCl<sub>3</sub>) δ = 8.88 (d, *J* = 4.8 Hz, 1H, Ph), 7.85 – 7.79 (m, 2H, Ph), 7.65 (t, *J* = 7.7 Hz, 1H, Ph), 7.45 (m, 3H, Ph), 7.37 (d, *J* = 5.1 Hz, 7H, Ph), 7.28 (m, 1H, Ph), 7.24 (m, 1H, Ph), 7.21 (d, *J* = 7.1 Hz, 2H, Ph), 6.92 (t, *J* = 7.4 Hz, 1H, Ph), 6.83 (t, *J* = 7.3 Hz, 2H, Ph), 6.58 (d, *J* = 8.1 Hz, 2H, Ph), 5.29 (s, 1H, C\*H), 4.03 (d, *J* = 12.2 Hz, 1H, Bn), 3.79 (dd, *J* = 17.8, 8.2 Hz, 1H, Bn), 3.60 (d, *J* = 5.6 Hz, 1H, CH<sub>2</sub>-Im), 3.55 (d, *J* = 12.1 Hz, 1H, CH<sub>2</sub>-Im), 3.48 (d, *J* = 8.0 Hz, 1H, CH<sub>2</sub>-Im), 3.35 (dd, *J* = 13.2, 6.8 Hz, 1H, CH<sub>2</sub>-Im). <sup>31</sup>P NMR (200 MHz, CDCl<sub>3</sub>) δ = -11.78 (s). High resolution ESI-MS: *m/z* for [M-Cl]<sup>+</sup> = 562.1476 (calcd. 562.1473) = [CuC<sub>33</sub>H<sub>30</sub>N<sub>3</sub>P]<sup>+</sup>.

### Synthesis of [Cu(NNP)(CH<sub>3</sub>CN)][X] complexes

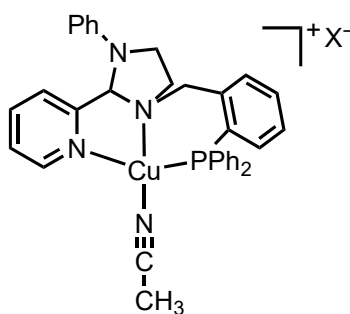

In a 50 mL Schlenk flask, [Cu(CH<sub>3</sub>CN)<sub>4</sub>][X] (X = BF<sub>4</sub>, PF<sub>6</sub>, OTf) (0.05 mmol) and NNP (0.025 g, 0.05 mmol) were dissolved in 5 mL dry acetonitrile under N<sub>2</sub> atm. The colorless reaction mixture was stirred for 5 h at room temperature under N<sub>2</sub> atm. The solvent was evaporated under reduced pressure. A colorless solid compound was obtained.

[Cu(NNP)(CH<sub>3</sub>CN)][BF<sub>4</sub>]: Yield: (0.032 g, 92%), <sup>1</sup>H NMR (500 MHz, CDCl<sub>3</sub>) δ = 8.69 (d, *J* = 3.9 Hz, 1H, Ph), 7.79 (t, *J* = 7.6 Hz, 1H, Ph), 7.48 (d, *J* = 5.9 Hz, 8H, Ph), 7.41 (t, *J* = 11.2

Hz, 4H, Ph), 7.33 (d,  $J = 18.4$  Hz, 3H, Ph), 7.25 (m, 1H, Ph), 6.91 (d,  $J = 8.8$  Hz, 1H, Ph), 6.83 (m, 2H, Ph), 6.57 (d,  $J = 8.2$  Hz, 2H, Ph), 5.25 (s, 1H, C\*H), 4.02 (d,  $J = 12.4$  Hz, 1H, Bn), 3.84 (dd,  $J = 17.0, 9.4$  Hz, 1H, Bn), 3.61 – 3.55 (m, 2H, CH<sub>2</sub>-Im), 3.48 (dd,  $J = 12.8, 6.7$  Hz, 1H, CH<sub>2</sub>-Im), 3.35 (dd,  $J = 19.7, 11.4$  Hz, 1H, CH<sub>2</sub>-Im), 2.19 (s, 3H, -CH<sub>3</sub>). <sup>31</sup>P NMR (200 MHz, CDCl<sub>3</sub>)  $\delta = -8.12$  (s).

[Cu(NNP)(CH<sub>3</sub>CN)][PF<sub>6</sub>]: Yield: (0.035 g, 93%), <sup>1</sup>H NMR (400 MHz, CDCl<sub>3</sub>)  $\delta = 8.68$  (s, 1H, Ph), 7.79 (t,  $J = 7.6$  Hz, 1H, Ph), 7.44 (dd,  $J = 19.0, 10.6$  Hz, 11H, Ph), 7.37 – 7.28 (m, 3H), 6.91 (m, 1H, Ph), 6.87 – 6.80 (m, 2H, Ph), 6.56 (d,  $J = 8.1$  Hz, 2H, Ph), 5.24 (s, 1H, C\*H), 4.03 (d,  $J = 12.4$  Hz, 1H, Bn), 3.85 (dd,  $J = 17.1, 9.2$  Hz, 1H, Bn), 3.59 (dd,  $J = 19.5, 10.4$  Hz, 2H, CH<sub>2</sub>-Im), 3.50 – 3.43 (m, 1H, CH<sub>2</sub>-Im), 3.39 – 3.30 (m, 1H, CH<sub>2</sub>-Im), 2.19 (s, 3H, -CH<sub>3</sub>). <sup>31</sup>P NMR (200 MHz, CDCl<sub>3</sub>)  $\delta = -8.21$  (s),  $-(137.80) -140.72, -145.29, -147.32, -152.27$  (quintet).

[Cu(NNP)(CH<sub>3</sub>CN)][OTf]: Yield: (0.036 g, 95%), <sup>1</sup>H NMR (400 MHz, CDCl<sub>3</sub>)  $\delta = 8.85$  (d,  $J = 4.8$  Hz, 1H, Ph), 7.75 (t,  $J = 7.3$  Hz, 1H, Ph), 7.64 – 7.59 (m, 2H, Ph), 7.45 (dd,  $J = 21.2, 5.5$  Hz, 11H, Ph), 7.29 (d,  $J = 8.4$  Hz, 3H, Ph), 6.87 (dd,  $J = 18.1, 11.4$  Hz, 3H, Ph), 6.59 (d,  $J = 8.1$  Hz, 2H, Ph), 5.27 (s, 1H, C\*H), 3.95 (d,  $J = 12.4$  Hz, 1H, Bn), 3.80 (dd,  $J = 17.6, 8.5$  Hz, 1H, Bn), 3.60 (d,  $J = 12.4$  Hz, 1H, CH<sub>2</sub>-Im), 3.55 – 3.49 (m, 1H, CH<sub>2</sub>-Im), 3.45 – 3.32 (m, 2H, CH<sub>2</sub>-Im), 2.06 (s, 3H, -CH<sub>3</sub>). <sup>31</sup>P NMR (200 MHz, CDCl<sub>3</sub>)  $\delta = -7.14$  (s).

### Synthesis of [Cu<sub>2</sub>(NNP)<sub>2</sub>( $\mu$ -Cl)Cl<sub>2</sub>][CuCl<sub>2</sub>]

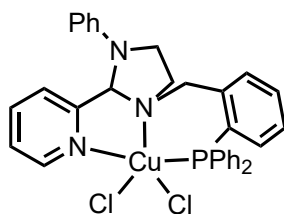

In a 50 mL Schlenk flask, CuCl<sub>2</sub> (0.006 g, 0.05 mmol) and NNP (0.025 g, 0.05 mmol) were dissolved in 5 mL dichloromethane under N<sub>2</sub> atm. The green reaction mixture was stirred for 5 h at room temperature under N<sub>2</sub> atm. The solvent was evaporated under reduced pressure. A green color solid compound was obtained. XRD quality crystals were formed by slow diffusion of diethyl ether into a concentrated dichloromethane solution of [Cu<sub>2</sub>(NNP)<sub>2</sub>( $\mu$ -Cl)Cl<sub>2</sub>][CuCl<sub>2</sub>] after 5 days. Yield: (0.060 g, 87%). High resolution ESI-MS:  $m/z$  for [M-Cl]<sup>+</sup> = 597.1164 (calcd. 597.1162) = [CuC<sub>33</sub>H<sub>30</sub>N<sub>3</sub>PCl]<sup>+</sup>; [M-2Cl]<sup>+</sup> = 562.1472 (calcd. 562.1473) =

$[\text{CuC}_{33}\text{H}_{30}\text{N}_3\text{P}]^+$ ;  $m/z = 500.2257$  (calcd. 500.2256) =  $[\text{NNP}+\text{H}]^+$ ;  $m/z = 1231.1998$  (calcd. 1231.1983 (96.0%)) =  $[\text{Cu}_2(\text{NNP})_2(\mu\text{-Cl})\text{Cl}_2]^+$ .

### Reduction of Cu (II) to Cu(I) using ascorbic acid:

A stock solution of ascorbic acid (5mM) in 5%  $\text{H}_2\text{O}$  in  $\text{CH}_3\text{CN}$  and  $[\text{Cu}_2(\text{NNP})_2(\mu\text{-Cl})\text{Cl}_2][\text{CuCl}_2]$ , (1mM) in 10 mL  $\text{CH}_3\text{CN}$  were prepared.

In a 50 mL Schlenk flask, 10 mL solution of  $[\text{Cu}_2(\text{NNP})_2(\mu\text{-Cl})\text{Cl}_2][\text{CuCl}_2]$  was taken. Ascorbic acid (520  $\mu\text{L}$ , 2.6 eq.) was added to it. The color of the reaction immediately changed from green to colorless. It was stirred for 2 h under a  $\text{N}_2$  atmosphere. The solvent was evaporated under reduced pressure and dried under a vacuum. The progress of the reaction was monitored by UV-vis spectroscopy, which showed a reduction of the Cu (II) complex ( $\lambda_{\text{max}}$  around 600-800 nm corresponding to a d-d transition band of  $d^9$  Cu (II) species) to Cu(I) species (no d-d transition band). The formation of  $[\text{Cu}_2(\text{NNP})_2(\mu\text{-Cl})\text{Cl}_2][\text{CuCl}_2]$  was confirmed by  $^1\text{H}$  and  $^{31}\text{P}$

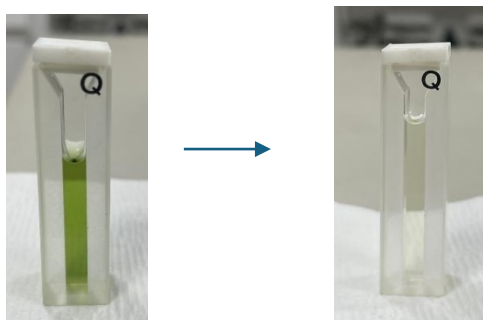

NMR.

### Reaction of $[\text{Cu}(\text{NNP})(\text{CH}_3\text{CN})][\text{BF}_4]$ with $\text{PPh}_3$

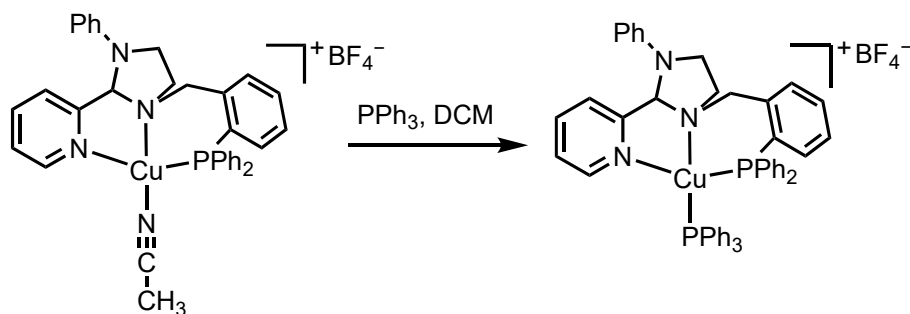

In a 50 mL Schenk flask,  $[\text{Cu}(\text{NNP})(\text{CH}_3\text{CN})][\text{BF}_4]$  (0.07 g, 0.1 mmol) was dissolved in 5 mL dichloromethane.  $\text{PPh}_3$  (0.026 g, 0.1 mmol) was added to it. The colorless reaction mixture was stirred for 6 h under  $\text{N}_2$  atmosphere. The solvent was evaporated under reduced pressure and dried under vacuum. A colorless solid compound was obtained after adding diethyl ether. XRD quality crystals were formed by slow diffusion of diethyl ether into a concentrated dichloromethane solution of  $[\text{Cu}(\text{NNP})(\text{PPh}_3)][\text{BF}_4]$  at room temperature after 2 days. Yield: (0.09 g, 98%).  $^1\text{H}$  NMR (500 MHz,  $\text{CDCl}_3$ )  $\delta$  = 8.20 (d,  $J$  = 4.8 Hz, 1H, Ph), 7.82 (t,  $J$  = 7.5 Hz, 1H, Ph), 7.58 (d,  $J$  = 6.8 Hz, 1H, Ph), 7.51 (d,  $J$  = 6.6 Hz, 2H, Ph), 7.43 (d,  $J$  = 7.9 Hz, 1H, Ph), 7.39 (m, 5H, Ph), 7.31 (m, 3H, Ph), 7.26 – 7.22 (m, 2H, Ph), 7.19 (t,  $J$  = 8.5 Hz, 7H, Ph), 7.05 (t,  $J$  = 6.9 Hz, 2H, Ph), 6.98 – 6.93 (m, 7H, Ph), 6.86 (t,  $J$  = 12.6 Hz, 2H, Ph), 6.68 – 6.62 (m, 2H, Ph), 6.49 (d,  $J$  = 8.1 Hz, 2H, Ph), 5.30 (s, 1H, C\*H), 4.40 (d,  $J$  = 12.7 Hz, 1H, Bn), 3.90 (d,  $J$  = 7.2 Hz, 1H, Bn), 3.74 (d,  $J$  = 12.7 Hz, 1H,  $\text{CH}_2$ -Im), 3.51 (t,  $J$  = 8.1 Hz, 1H,  $\text{CH}_2$ -Im), 3.30 – 3.23 (m, 1H,  $\text{CH}_2$ -Im), 3.10 (d,  $J$  = 10.2 Hz, 1H,  $\text{CH}_2$ -Im).  $^{31}\text{P}$  NMR (200 MHz,  $\text{CDCl}_3$ )  $\delta$  = 2.82 (d,  $J$  = 108.3 Hz), -9.63 (d,  $J$  = 85.7 Hz). High resolution ESI-MS:  $m/z$  for  $[\text{M}-\text{BF}_4-\text{PPh}_3]^+ = 562.1461$  (calcd. 562.1473) =  $[\text{CuC}_{33}\text{H}_{30}\text{N}_3\text{P}]^+$ .

### Transmetalation Reaction

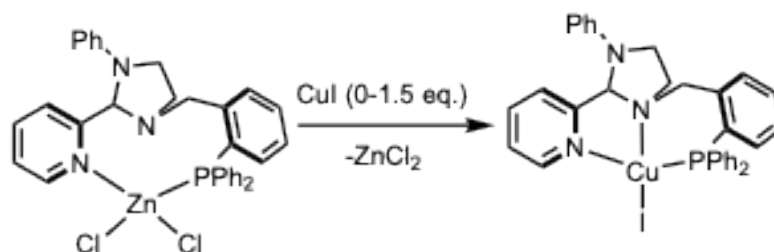

In an NMR tube,  $[(\text{NNP})\text{ZnCl}_2]$  (0.010 g, 0.030 mmol) was dissolved in 300  $\mu\text{L}$  of  $\text{CDCl}_3$ , while  $\text{CuI}$  (0.008 g, 0.045 mmol, 1.5 equiv.) was separately dissolved in 300  $\mu\text{L}$  of  $\text{CD}_3\text{CN}$ . Aliquots of 100  $\mu\text{L}$  from the  $\text{CuI}$  solution were sequentially added to the  $\text{Zn}(\text{II})$  solution, and the reaction was monitored by  $^1\text{H}$  and  $^{31}\text{P}$  NMR spectroscopy. With each addition, the resonance corresponding to the  $\text{Zn}(\text{II})$  complex gradually diminished, accompanied by the appearance of a new signal consistent with the formation of the  $[(\text{NNP})\text{CuI}]$  complex. The product was further characterized by high-resolution ESI-MS, which showed a peak at  $m/z$  562.1477 for  $[\text{M}-\text{I}]^+$ , in excellent agreement with the calculated value (562.1473) for  $[\text{CuC}_{33}\text{H}_{30}\text{N}_3\text{P}]^+$ .



## **Biological Activity**

### **Antibacterial Activity**

The broth microdilution assay was used to measure the antimicrobial activity of the synthesized compounds. Overnight grown *S. aureus* ATCC29213 culture was diluted to  $10^6$  CFU/mL in MHB media. Two-fold serial dilution of the compounds from the DMSO stock was prepared in 96-well plates (100  $\mu$ L), followed by the addition of 100  $\mu$ L bacterial culture. The plates were then kept in an incubator for 18-24 h at 37 °C. The MIC (Minimum Inhibitory Concentration) was identified as the minimum concentration at which no apparent growth was observed. For all the compounds, MIC was determined in biological replicates.

### **Anticancer Activity**

#### **Cell Lines and Culture Conditions:**

Breast adenocarcinoma cell lines MDA-MB-231 and MCF-7, Human lung adenocarcinoma cell line A549, and Human embryonic kidney cell line HEK-293 were obtained from the National Centre for Cell Science (NCCS Pune, India). The cell lines were maintained in RPMI 1640 (MDA-MB-231, MCF-7 and A549) or DMEM medium (HEK-293), supplemented with 10% fetal bovine serum, 10,000 Units/mL penicillin and 10,000  $\mu$ g/mL streptomycin, at 37 °C humidified atmosphere with 5% CO<sub>2</sub>. Compound stocks were prepared in DMSO.

#### **MTT assay:**

The cytotoxicity of the compounds was determined by the MTT assay. The cells were trypsinized and seeded into 96-well microculture plates at a seeding density of 2,500 cells per well. After 24 h, they were treated with drugs at different concentrations in the media for 72 h. Cisplatin was taken as a positive control. Then the cells were incubated with MTT solution for 4 h in the dark, and the absorbance was taken at 570 nm by SpectraMax M5e microplate reader. All procedures were carried out in triplicate in three independent experiments. IC<sub>50</sub> values were calculated using GraphPad Prism 8.0 software, and the results were presented as a mean  $\pm$  SD.

Figure S 1.  $^1\text{H}$  NMR spectrum of the (1) and (2) in  $\text{CDCl}_3$  at 298 K.

The Schiff base compound was found to be in equilibrium with the cyclized compound which was confirmed by  $^1\text{H}$  NMR and  $^{31}\text{P}$  NMR.

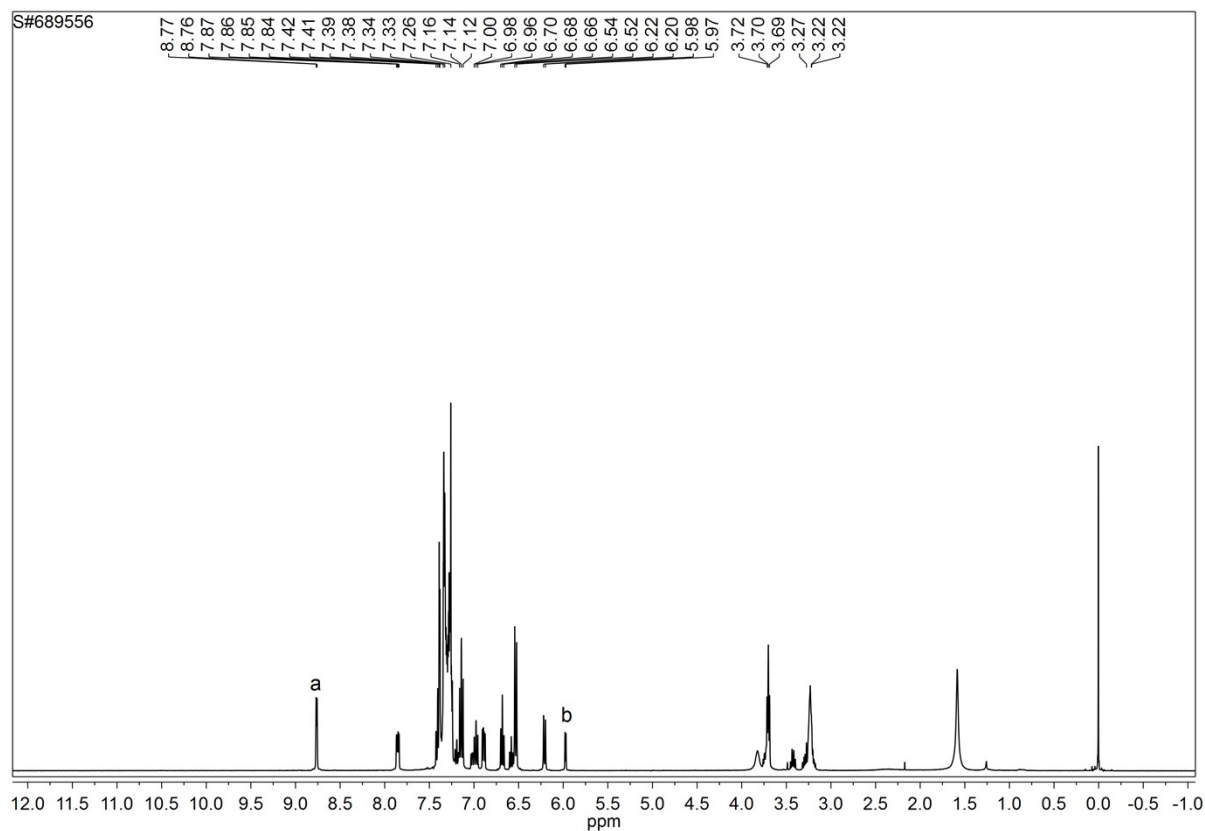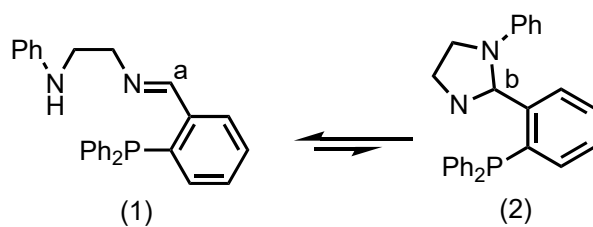

Figure S 2.  $^{31}\text{P}$  NMR spectrum of the (1) and (2) in  $\text{CDCl}_3$  at 298 K.

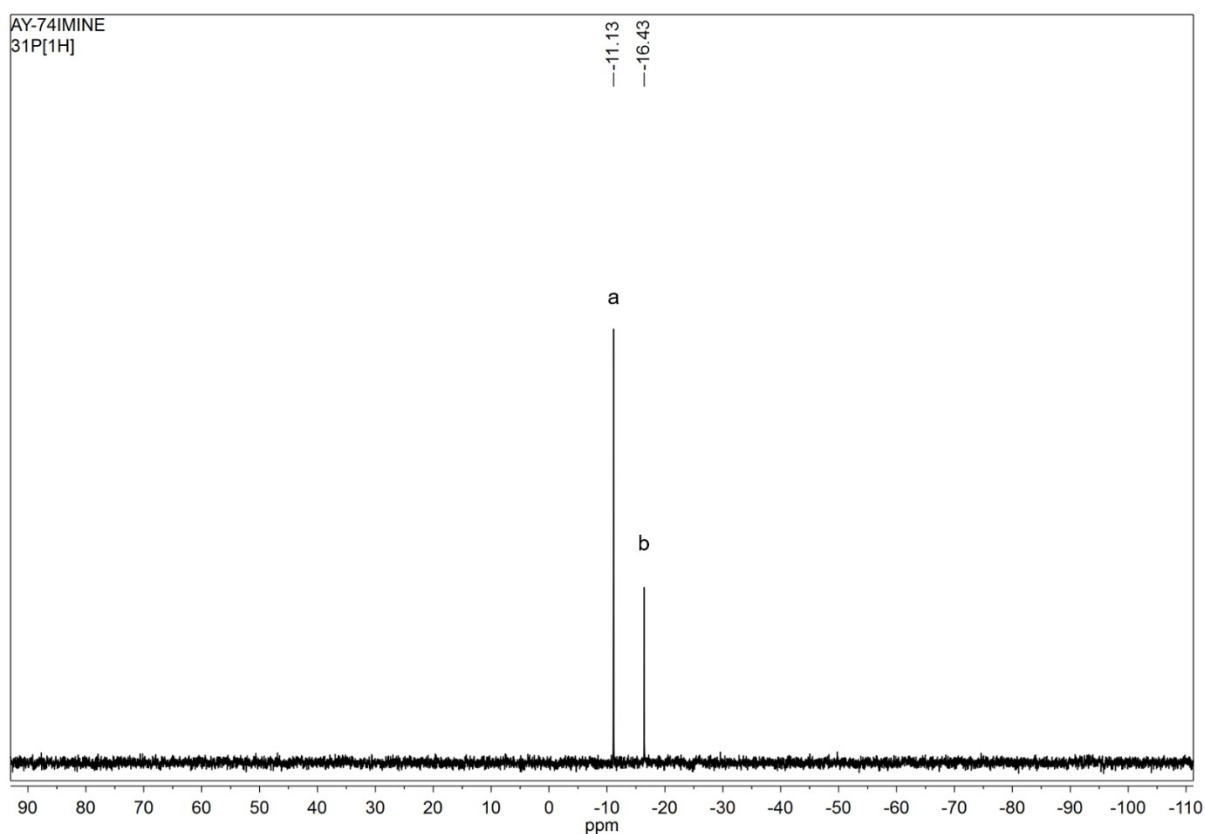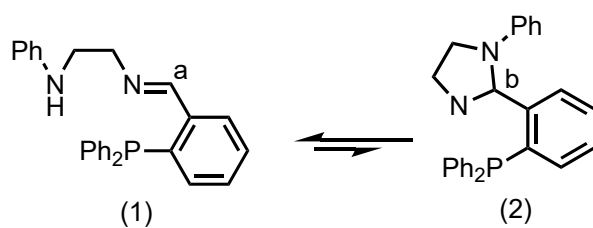



Figure S 3.  $^1\text{H}$  NMR spectrum of the  $N^1$ -(2-(diphenylphosphaneyl)benzyl)- $N^2$ -phenylethane-1,2-diamine (3) in  $\text{CDCl}_3$  at 298 K.

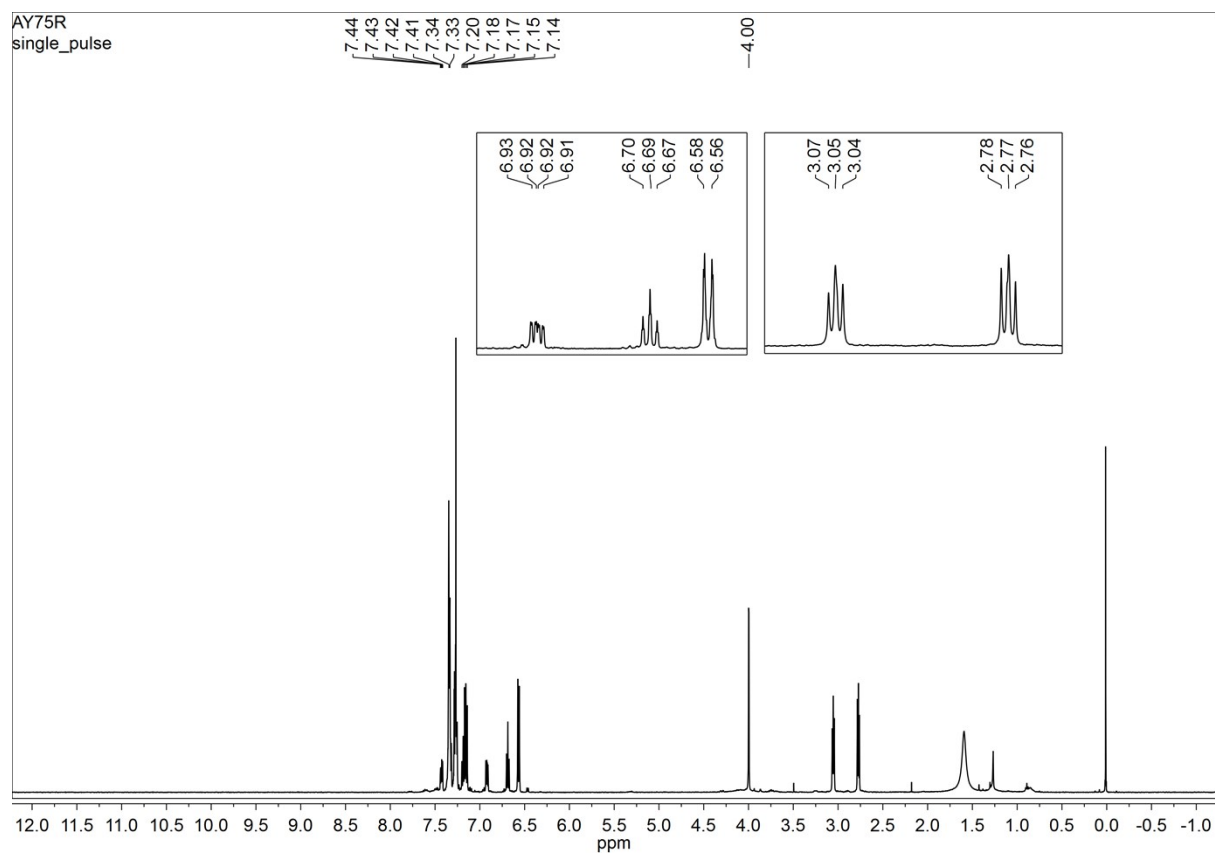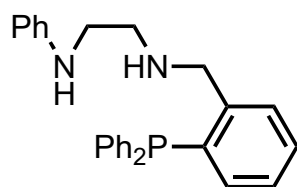

Figure S 4.  $^{13}\text{C}$  NMR spectrum of the  $N^1$ -(2-(diphenylphosphaneyl)benzyl)- $N^2$ -phenylethane-1,2-diamine (3) in  $\text{CDCl}_3$  at 298 K.

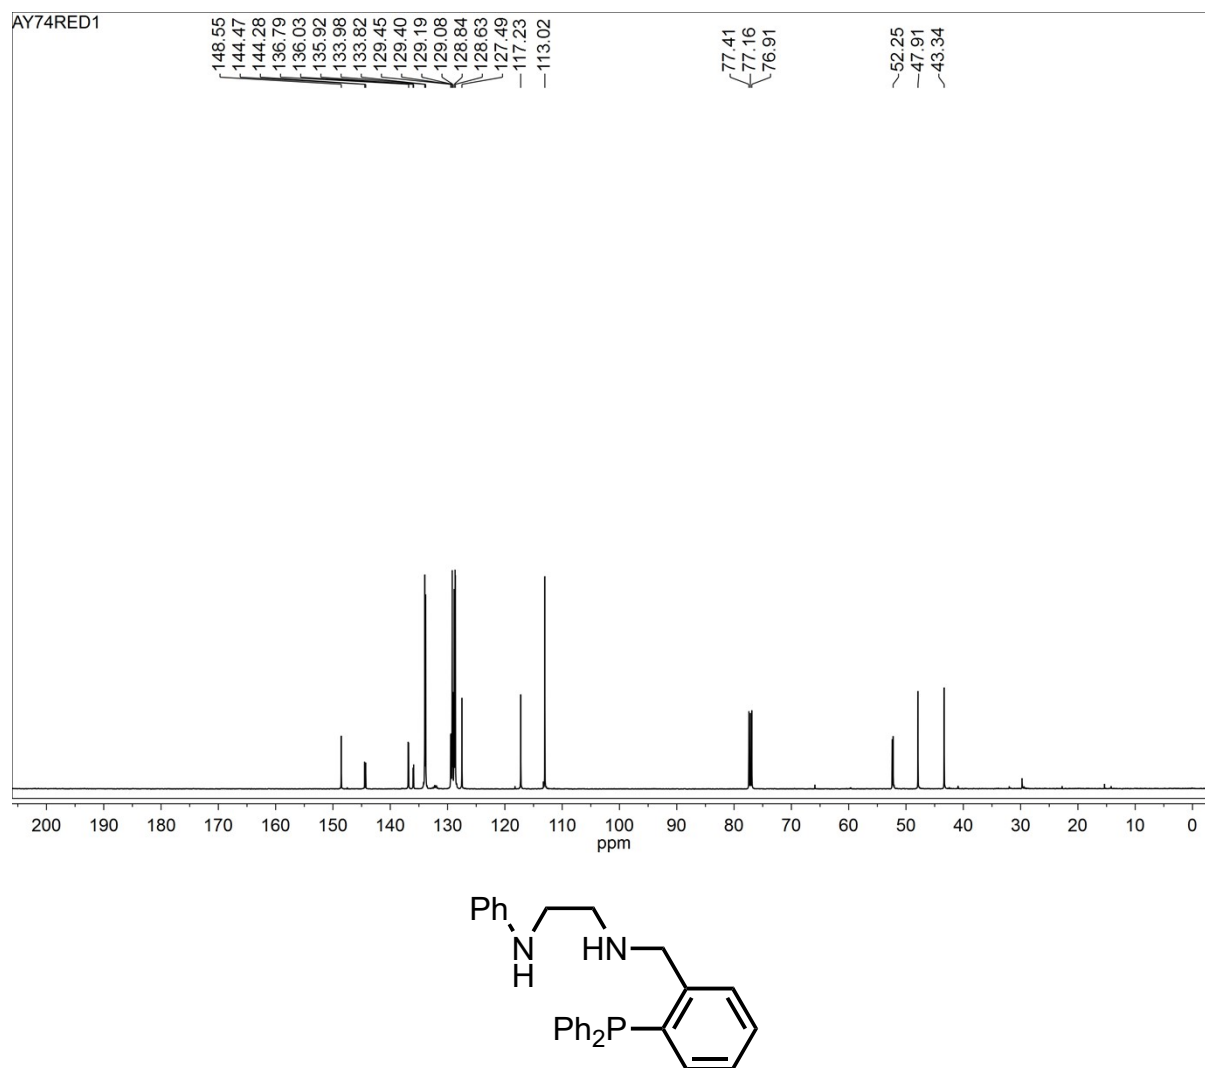

Figure S 5.  $^{31}\text{P}$  NMR spectrum of the  $N^1$ -(2-(diphenylphosphaneyl)benzyl)- $N^2$ -phenylethane-1,2-diamine (3) in  $\text{CDCl}_3$  at 298 K.

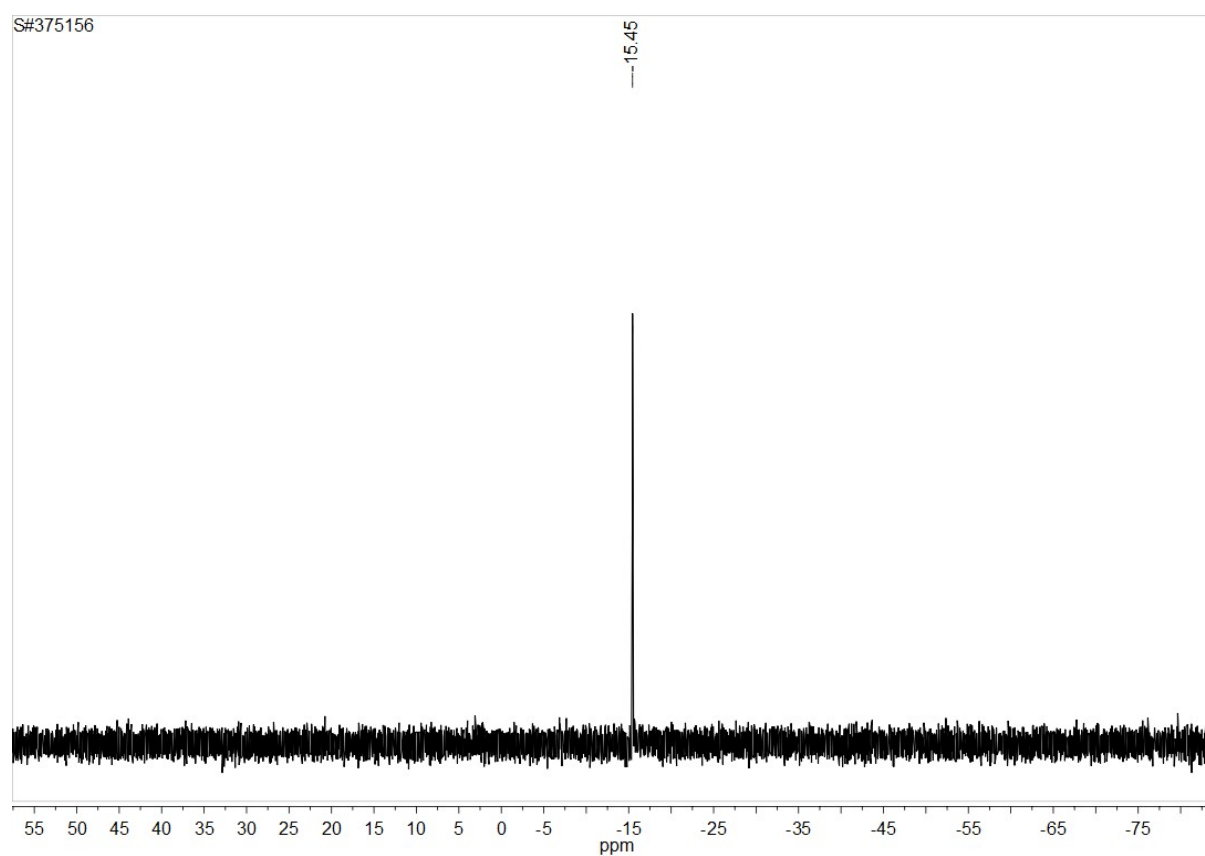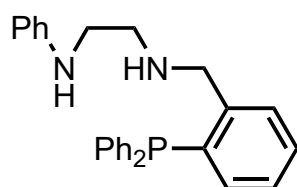

Figure S 6.  $^1\text{H}$  NMR spectrum of the NNP in  $\text{CDCl}_3$  at 298 K.

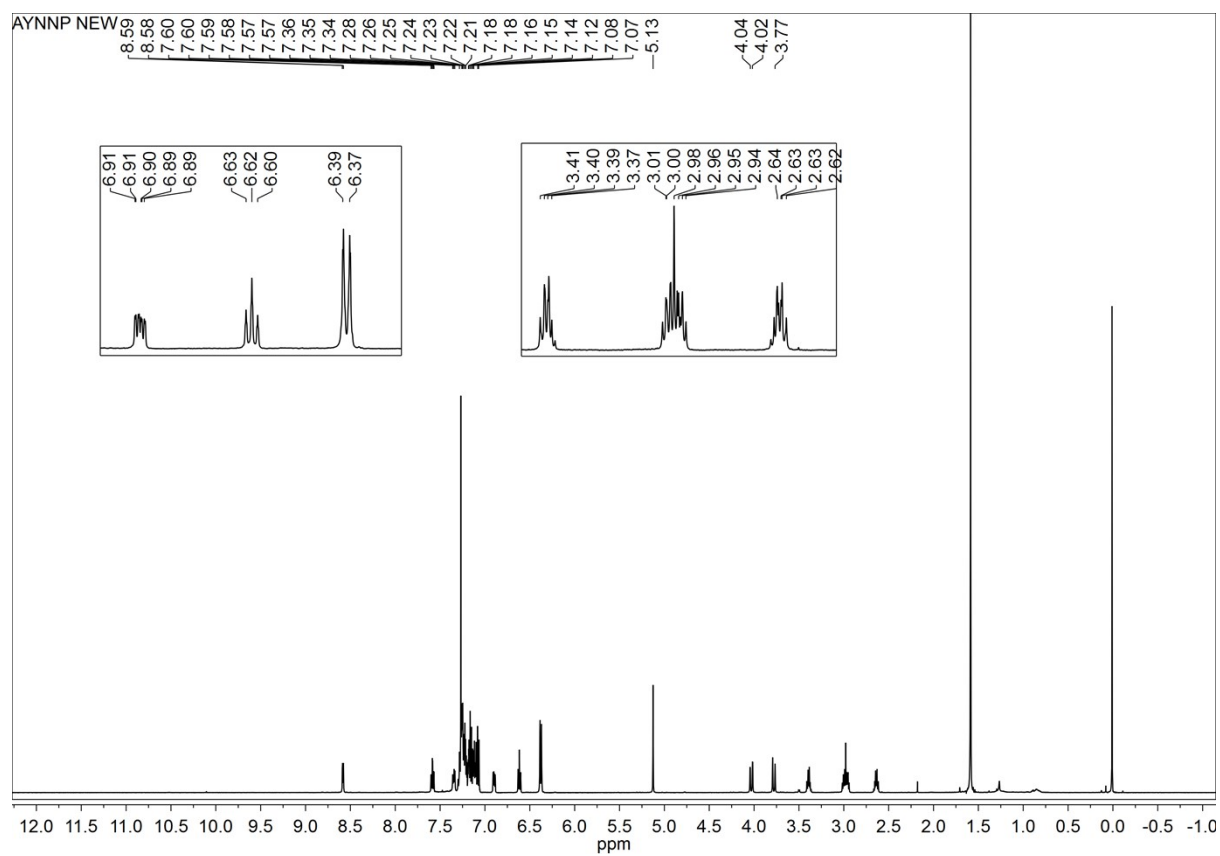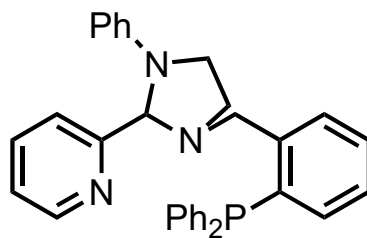

Figure S 7.  $^{13}\text{C}$  NMR spectrum of the NNP in  $\text{CDCl}_3$  at 298 K.

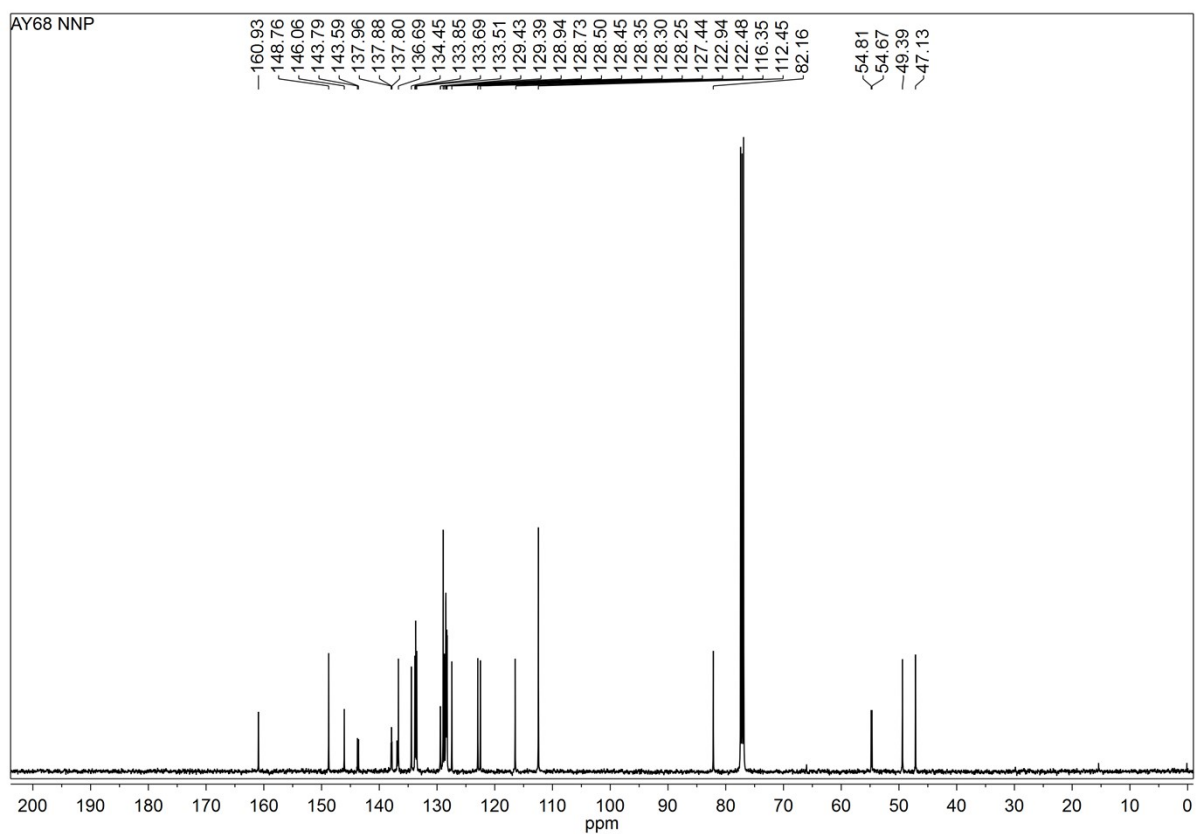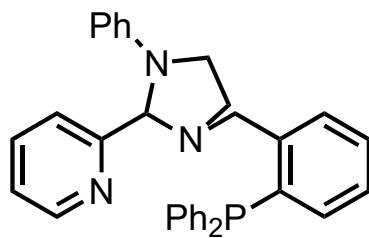

Figure S 8.  $^{31}\text{P}$  NMR spectrum of the NNP in  $\text{CDCl}_3$  at 298 K.

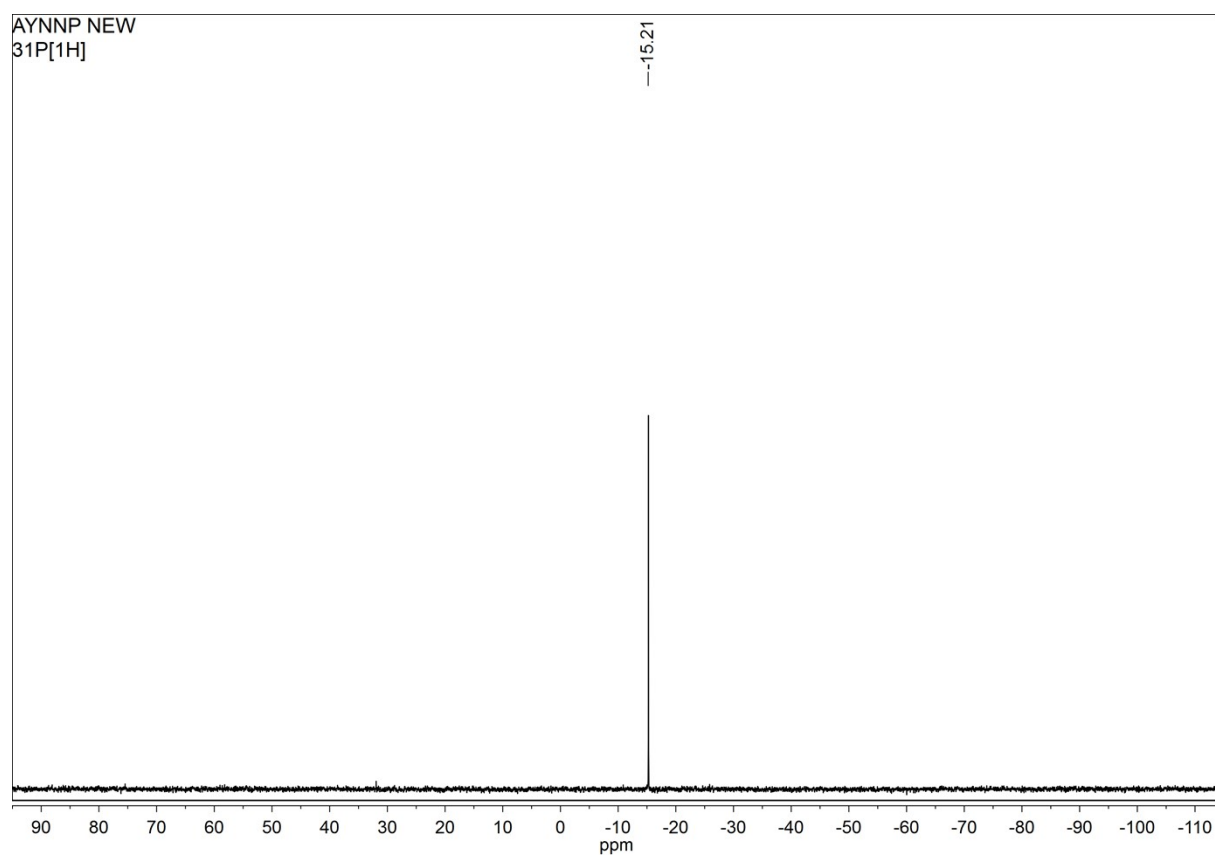

Figure S 9. ESI-MS of NNP

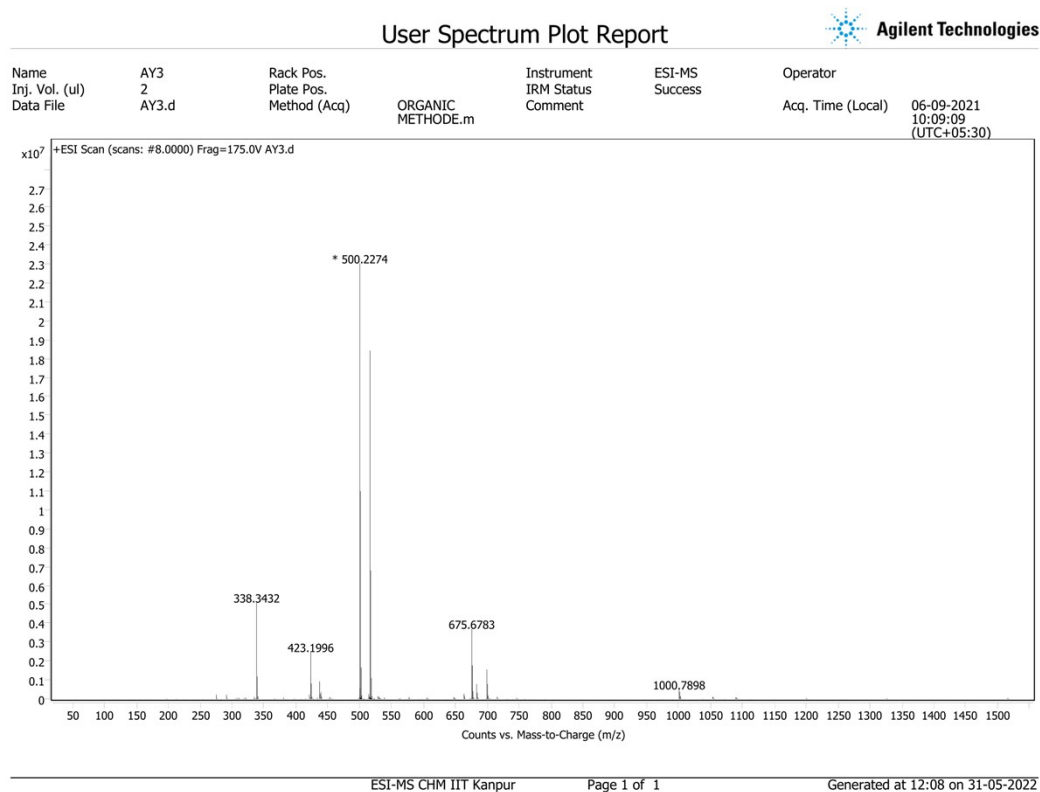

High resolution ESI-MS:  $m/z$  for  $[M+H]^+ = 500.2274$  (calcd. 500.2256) =  $[C_{33}H_{31}N_3P]^+$ .

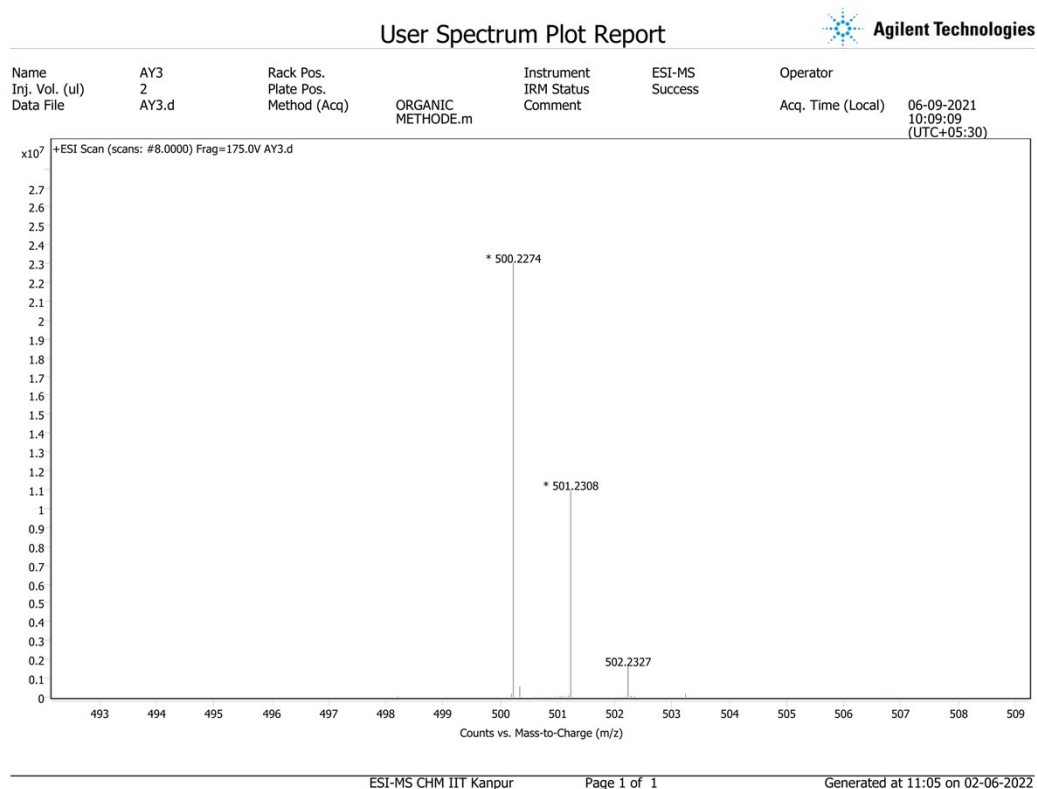

Figure S 10. Simulated ESI-MS of NNP

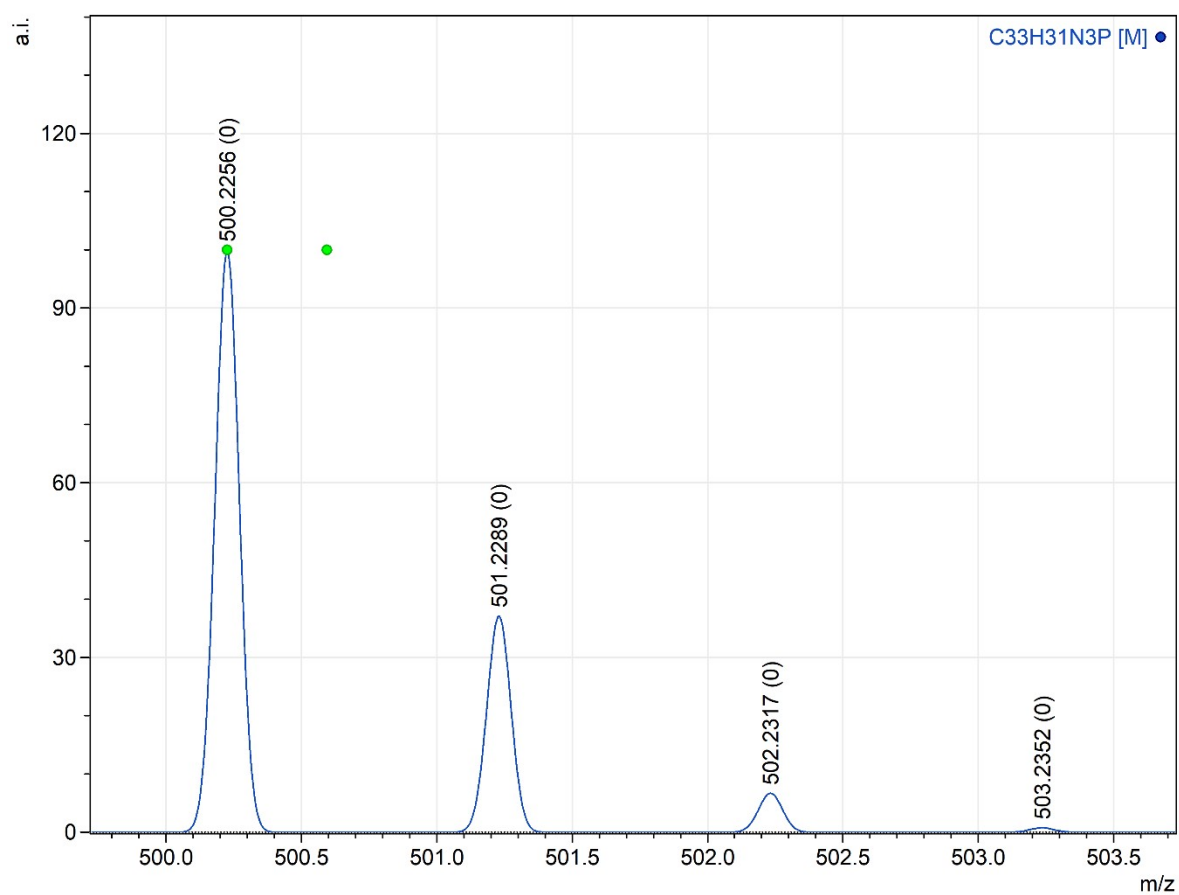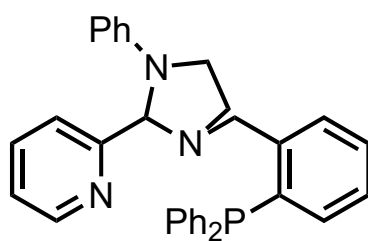



Figure S 11.  $^1\text{H}$  NMR of  $[\text{Zn}(\text{NNP})\text{Cl}_2]$  complex in  $\text{CDCl}_3$  at 298 K.

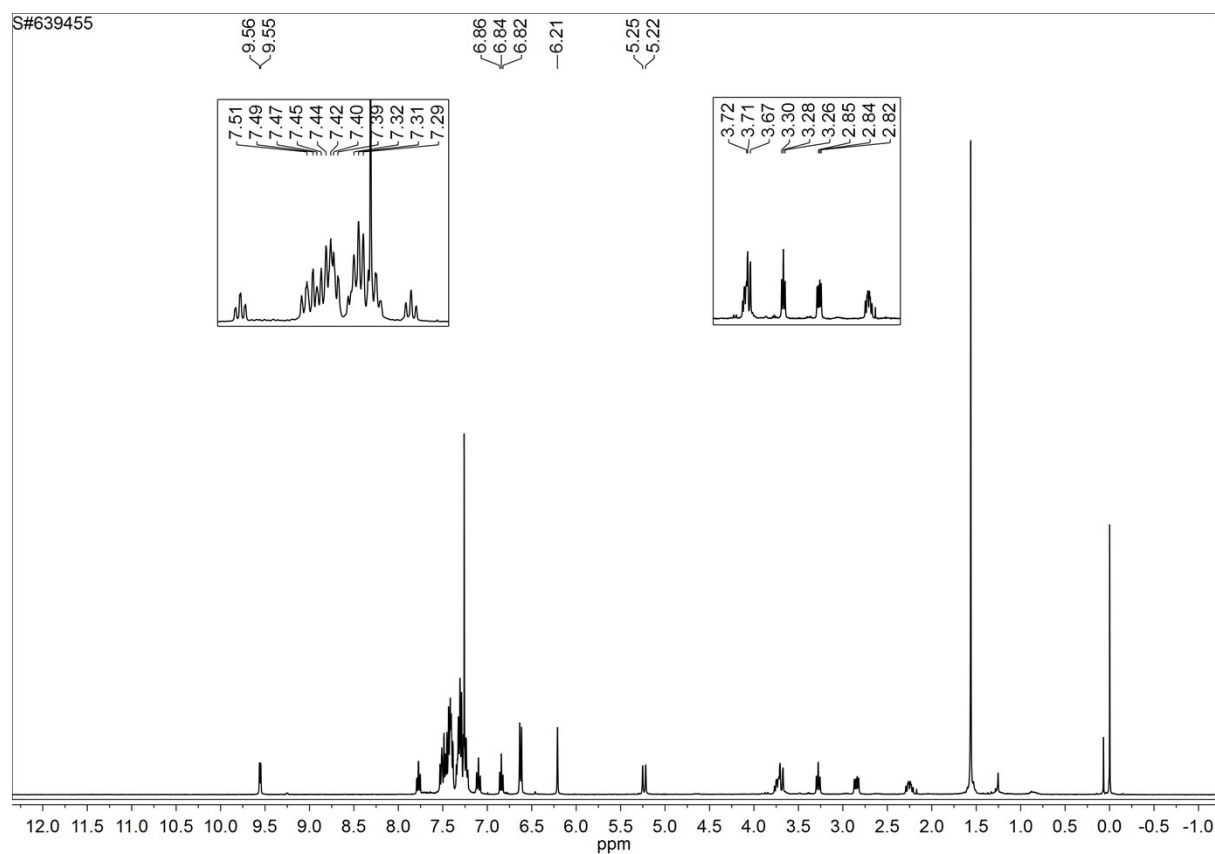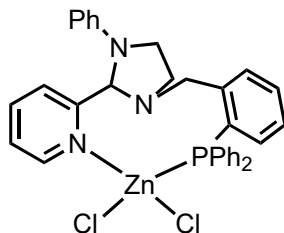

Figure S 12.  $^{13}\text{C}$  NMR of  $[\text{Zn}(\text{NNP})\text{Cl}_2]$  complex in  $\text{CDCl}_3$  at 298 K.

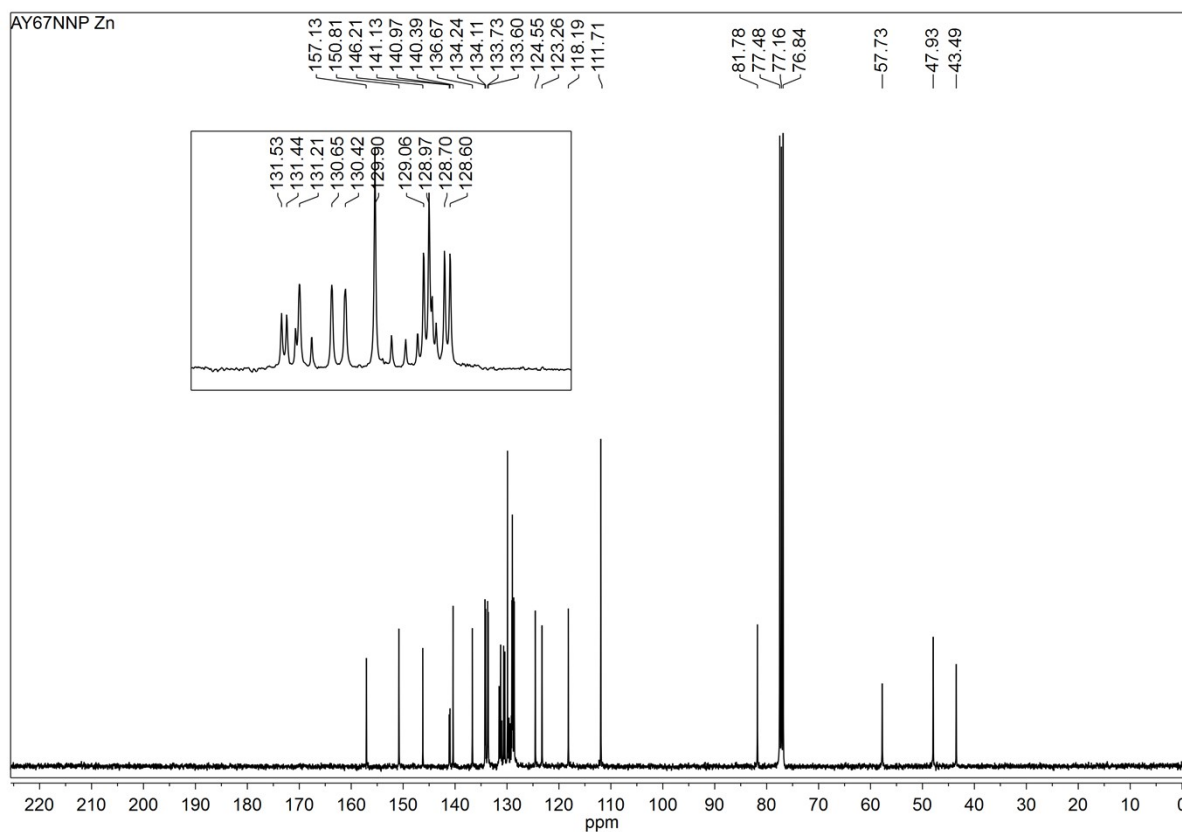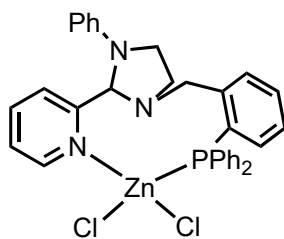

Figure S 13.  $^{31}\text{P}$  NMR of  $[\text{Zn}(\text{NNP})\text{Cl}_2]$  complex in  $\text{CDCl}_3$  at 298 K.

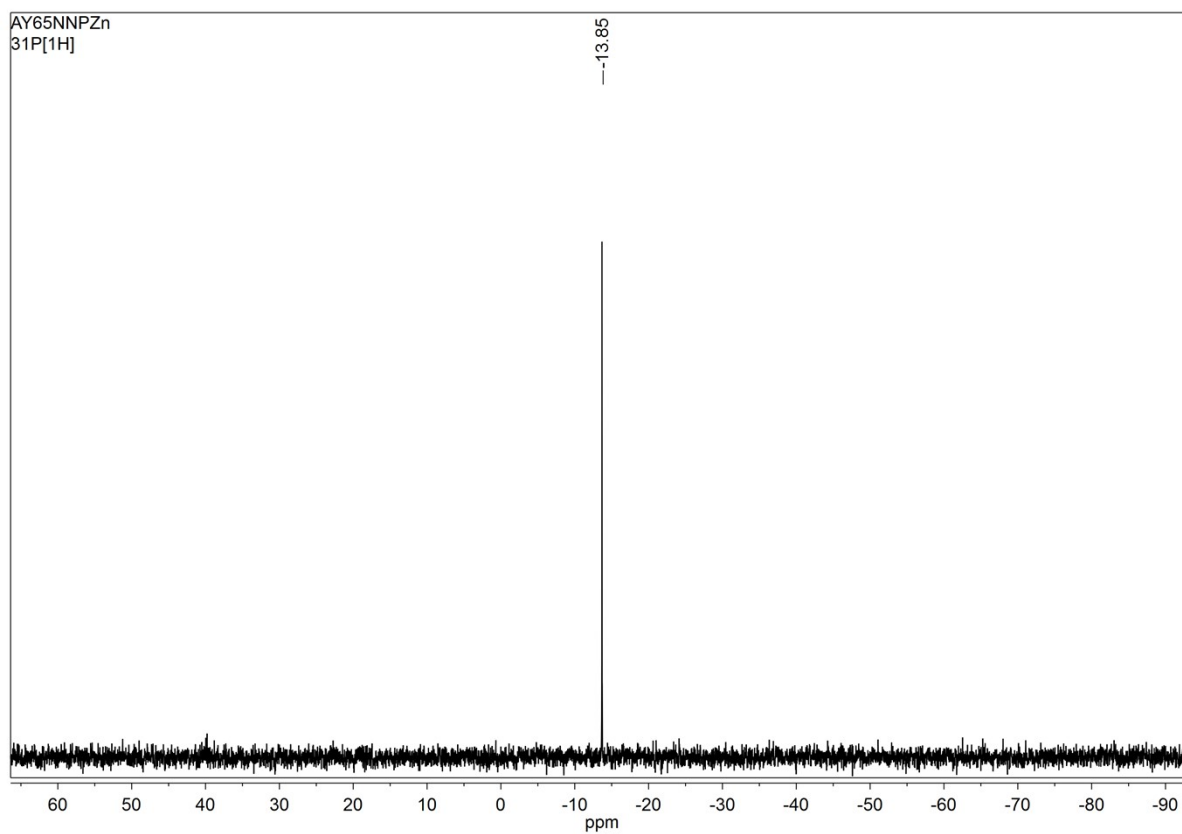

Figure S 14. Elemental analysis of [Zn(NNP)Cl<sub>2</sub>] complex.

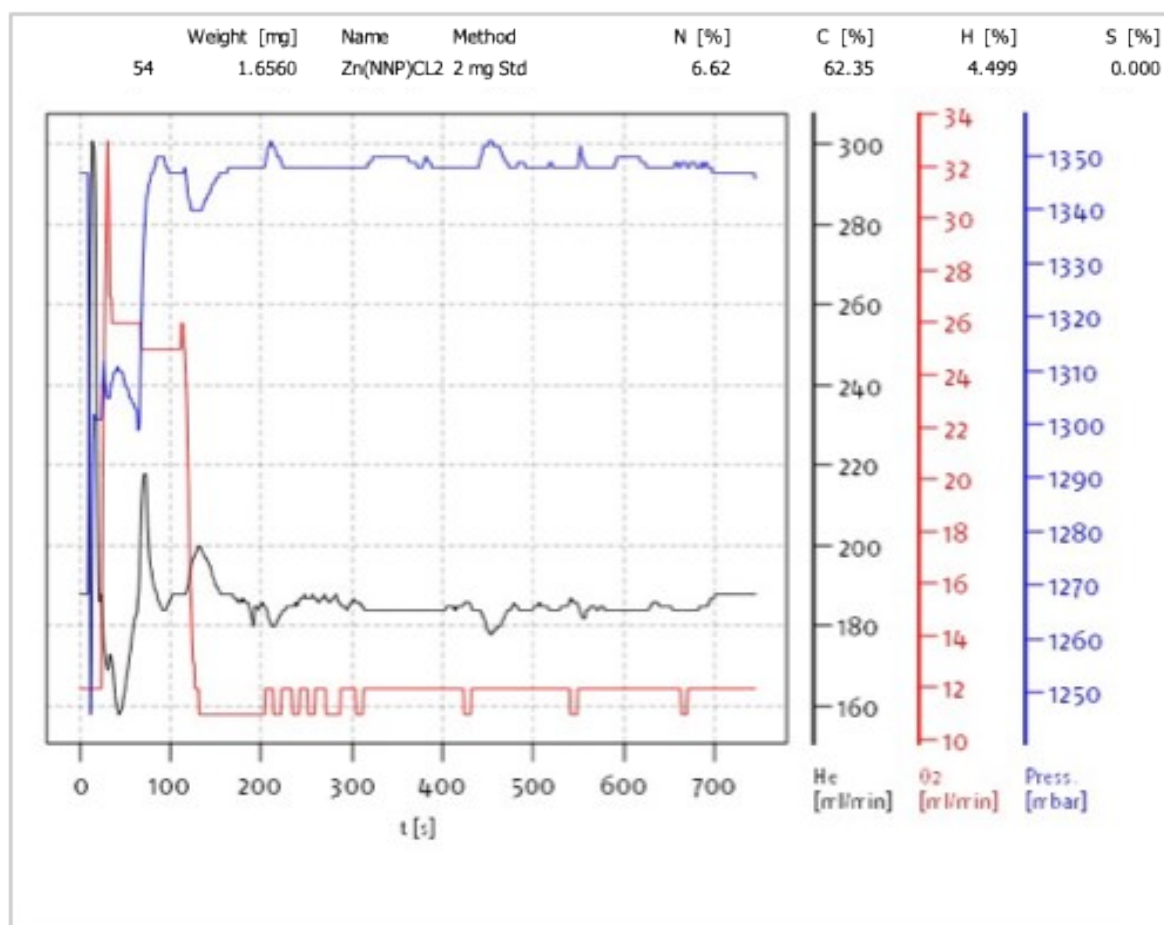

Elemental analysis calculated (%) for C<sub>33</sub>H<sub>30</sub>Cl<sub>2</sub>N<sub>3</sub>PZn: C, 62.33; H, 4.76; N, 6.61. Found: C, 62.35; H, 4.49; N, 6.62.

Figure S 15. ESI-MS of  $[\text{Zn}(\text{NNP})\text{Cl}_2]$  complex.

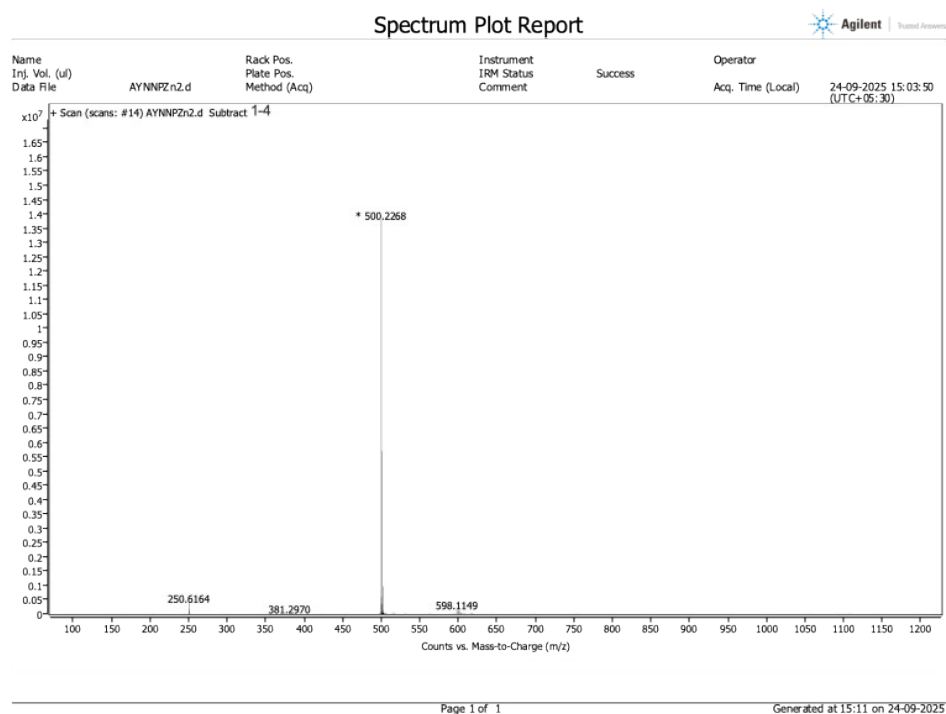

High resolution ESI-MS:  $m/z$  for  $[\text{M}-\text{Cl}]^+ = 598.1149$  (calcd. 598.1157) =  $[\text{ZnC}_{33}\text{H}_{30}\text{N}_3\text{PCl}]^+$ ,  
 $[\text{NNP}+\text{H}] = 500.2268$  (calcd. 500.2256) =  $[\text{C}_{33}\text{H}_{31}\text{N}_3\text{P}]^+$ .

# Spectrum Plot Report

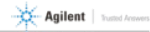

| Name           | Rack Pos.    | Instrument | Operator                           |
|----------------|--------------|------------|------------------------------------|
| Inj. Vol. (ul) | Plate Pos.   | IRN Status | Acq. Time (Local)                  |
| Data File      | Method (Acq) | Comment    | 24-09-2025 15:03:50<br>(UTC+05:30) |

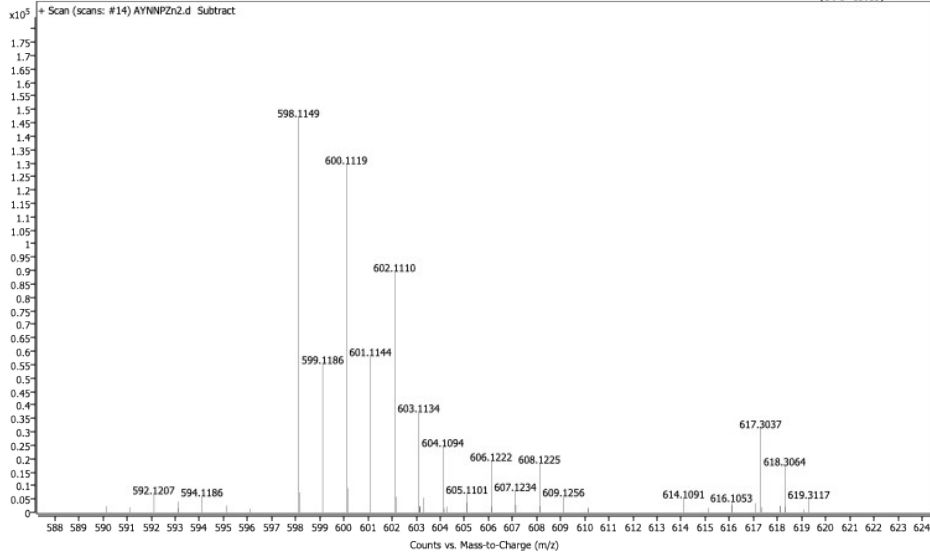

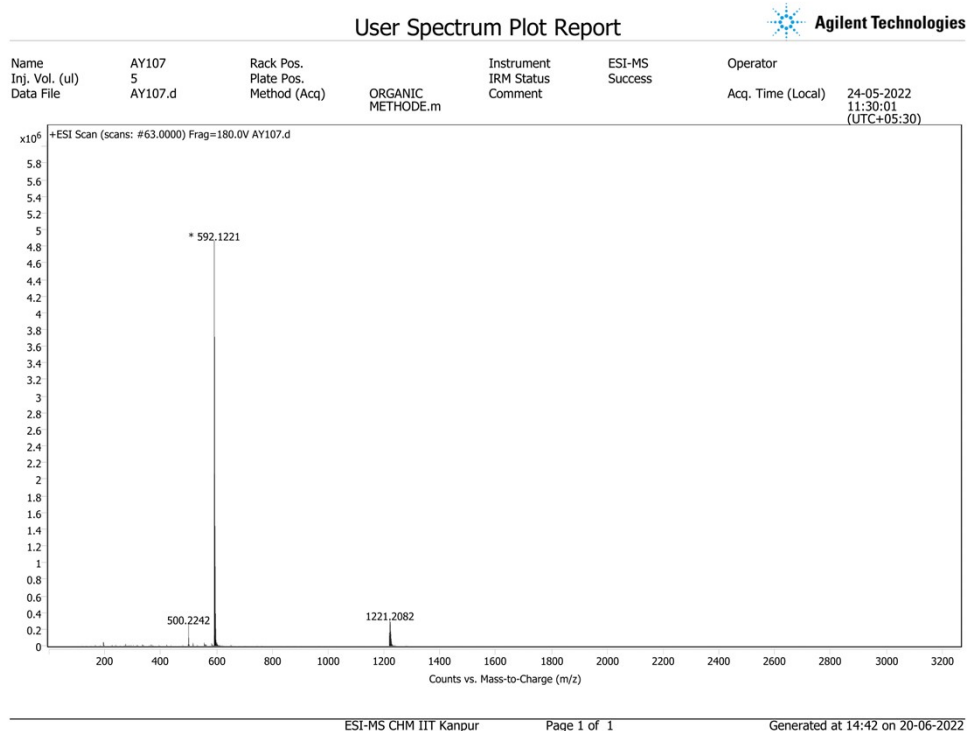

Figure S 16. ESI-MS of  $[\text{Ni}(\text{NNP})\text{Cl}_2] \cdot \text{CH}_3\text{CN}$

High resolution ESI-MS:  $m/z$  for  $[\text{M}-\text{Cl}]^+ = 592.1221$  (calcd. 592.1219) =  $[\text{NiC}_{33}\text{H}_{30}\text{N}_3\text{ClP}]^+$ .

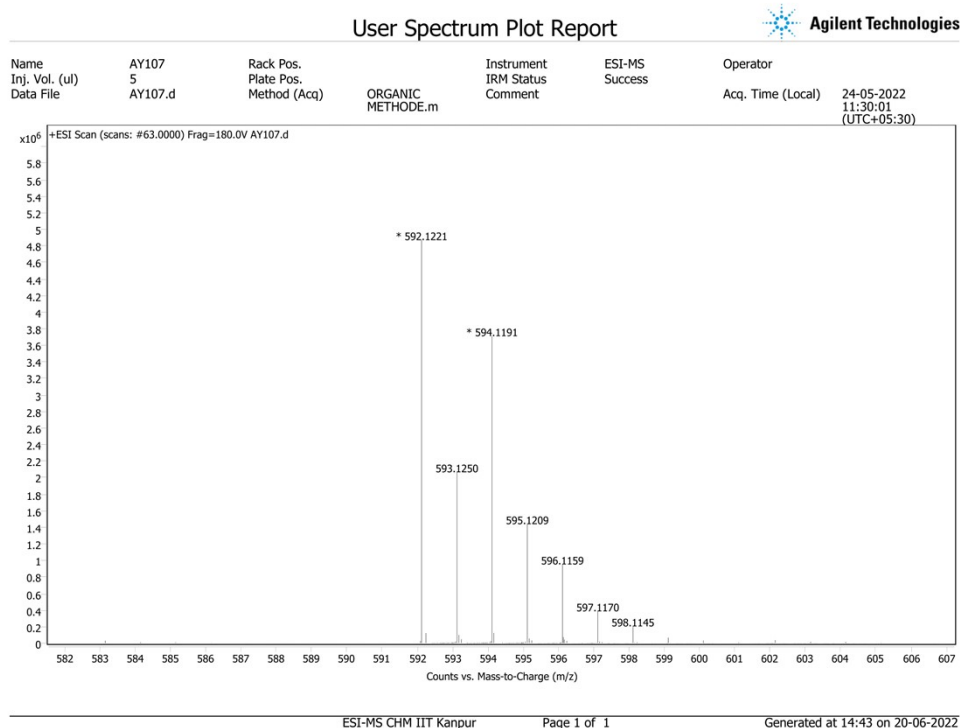

Figure S 17. Simulated ESI-MS of  $[\text{Ni}(\text{NNP})\text{Cl}_2] \cdot \text{CH}_3\text{CN}$  complex.

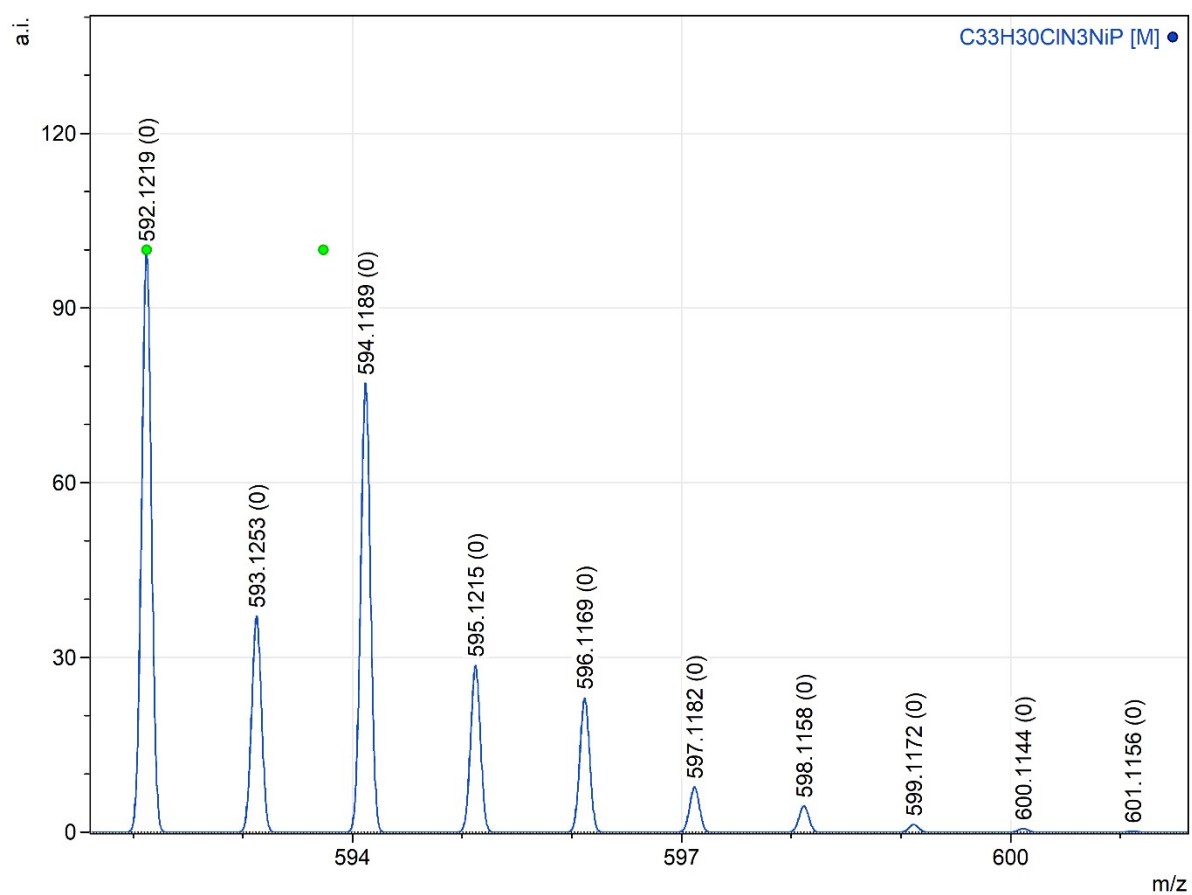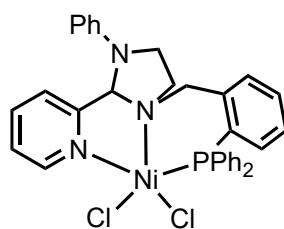



Figure S 18. Elemental analysis of  $[\text{Ni}(\text{NNP})\text{Cl}_2] \cdot \text{CH}_3\text{CN}$  complex.

|                |                     |                    |               |
|----------------|---------------------|--------------------|---------------|
| Date of report |                     | 6/6/2022 1:47:35PM |               |
| User ID        |                     | Administrator      |               |
| DATE & TIME    | 6/6/2022 1:33:41 PM | P_ID               | 06062022      |
| SAMPLE ID      | AYNNPNI             | USER ID            | Administrator |
| WEIGHT (mg)    | 1.550               | MODE               | CHN           |
| SIGNALS        |                     |                    |               |
|                |                     | ZR                 | 14004         |
| CARBON         | 62.77%              | NR                 | 14836         |
| HYDROGEN       | 4.88%               | CR                 | 31557         |
| NITROGEN       | 8.66%               | HR                 | 35168         |
| BLANKS         | -30                 | 251                | 14            |
| K FACTORS      | 17.217              | 44.417             | 6.097         |
| FILL           | COMB                | BOOST1             | BOOST2        |
| 0              | 0                   | 0                  | 0             |
| FILL TIME      | 33 Seconds          |                    |               |

Figure S 19. Cyclic voltammogram of  $[\text{Ni}(\text{NNP})\text{Cl}_2] \cdot \text{CH}_3\text{CN}$

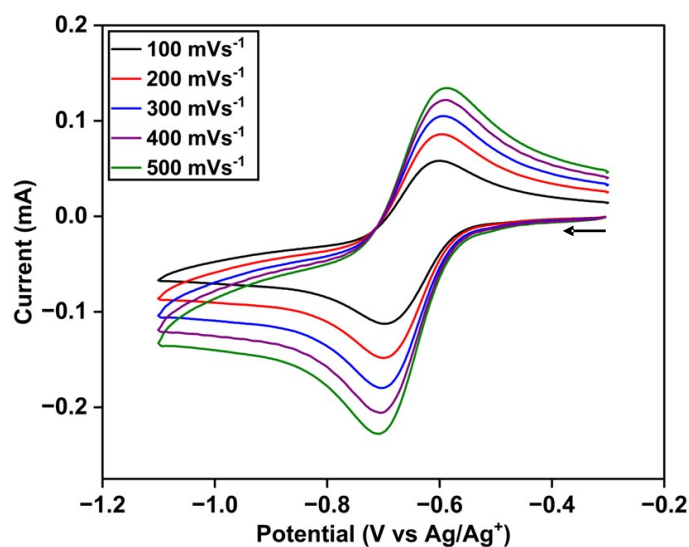

Cyclic Voltammograms of 1mM of  $[\text{Ni}(\text{NNP})\text{Cl}_2] \cdot \text{CH}_3\text{CN}$  complex at a static glassy Carbon working electrode with  $\text{Ag}/\text{AgCl}$  reference electrode, and a Pt wire auxiliary electrode at 25 °C in  $\text{CH}_3\text{CN}$  solution containing 0.1 M  $\text{TBAPF}_6$  (supporting electrolyte) at different scan rates under nitrogen atmosphere.

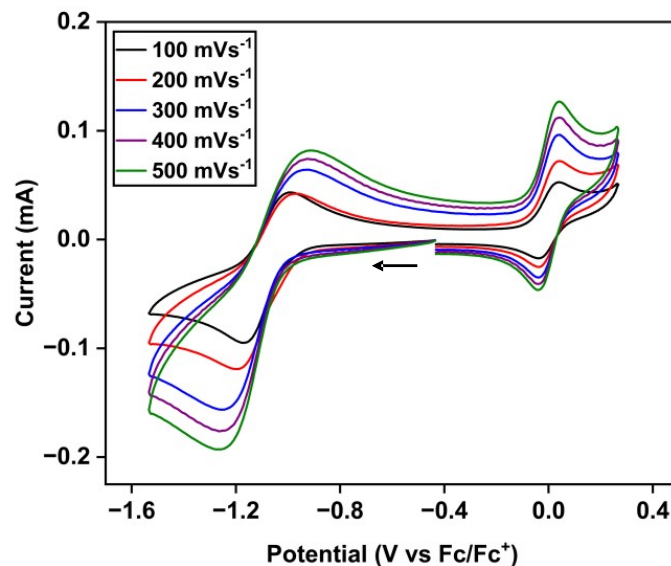

Cyclic Voltammograms of 1mM of  $[\text{Ni}(\text{NNP})\text{Cl}_2] \cdot \text{CH}_3\text{CN}$  complex after the addition of 1 mM ferrocene at a static glassy Carbon working electrode with  $\text{Ag}/\text{AgCl}$  reference electrode, and a Pt wire auxiliary electrode at 25 °C in  $\text{CH}_3\text{CN}$  solution containing 0.1 M  $\text{TBAPF}_6$  (supporting electrolyte) at different scan rates under nitrogen atmosphere.

Figure S 20.  $^1\text{H}$  NMR spectrum of the  $[\text{Pd}(\text{NNP})\text{Cl}][\text{Cl}]$  in  $\text{CDCl}_3$  at 298 K.

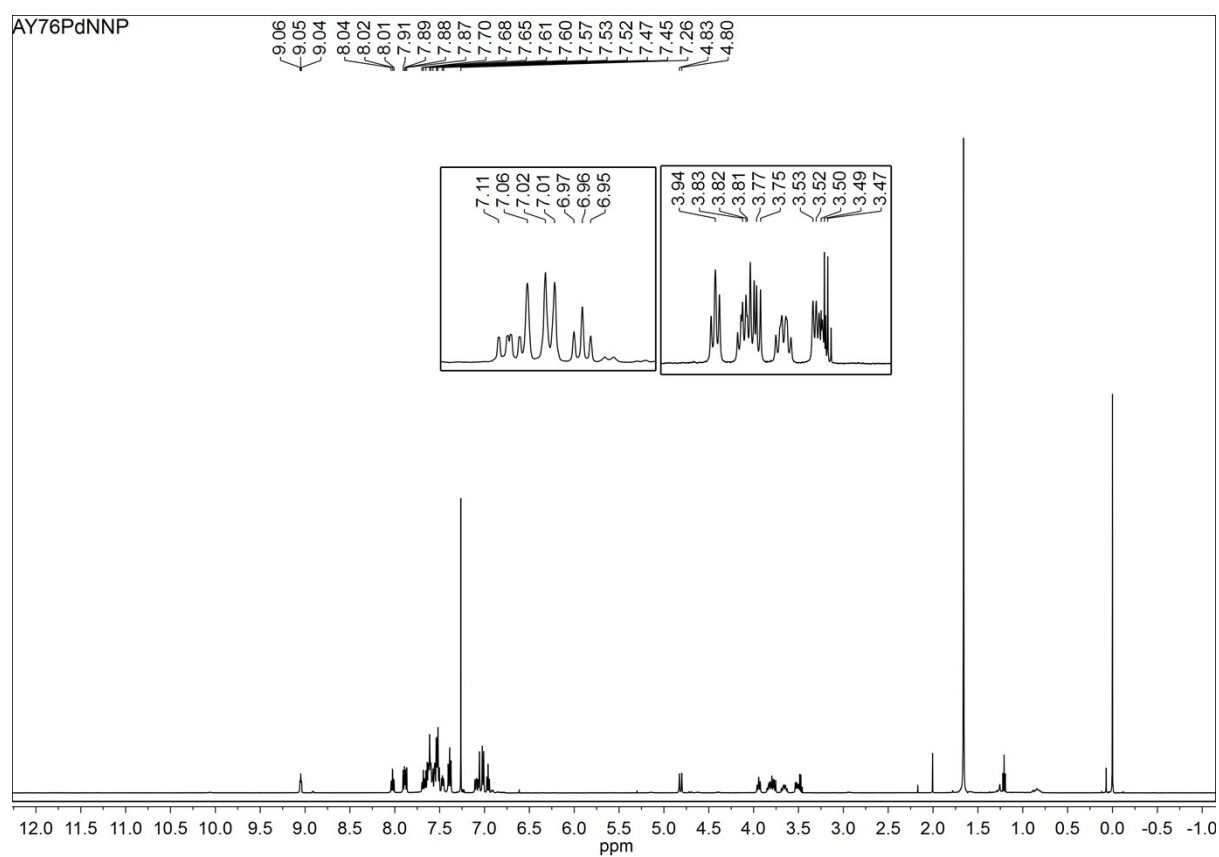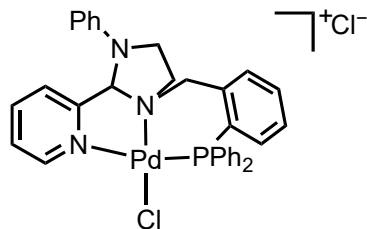

Figure S 21.  $^{13}\text{C}$  NMR spectrum of the  $[\text{Pd}(\text{NNP})\text{Cl}][\text{Cl}]$  in  $\text{CDCl}_3$  at 298 K.

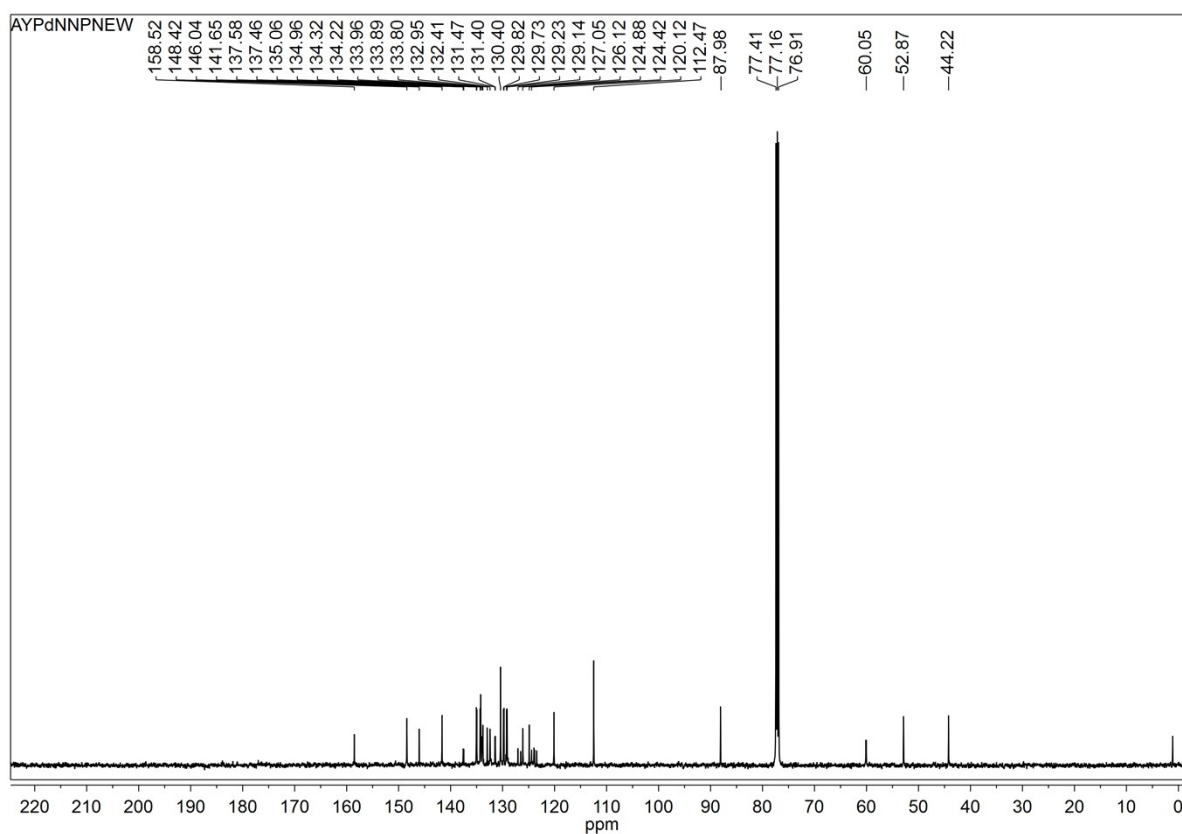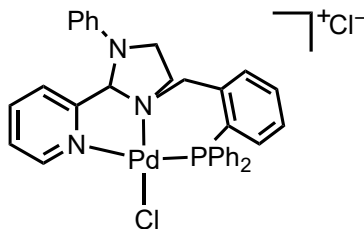

Figure S 22.  $^{31}\text{P}$  NMR spectrum of the  $[\text{Pd}(\text{NNP})\text{Cl}][\text{Cl}]$  in  $\text{CDCl}_3$  at 298 K.

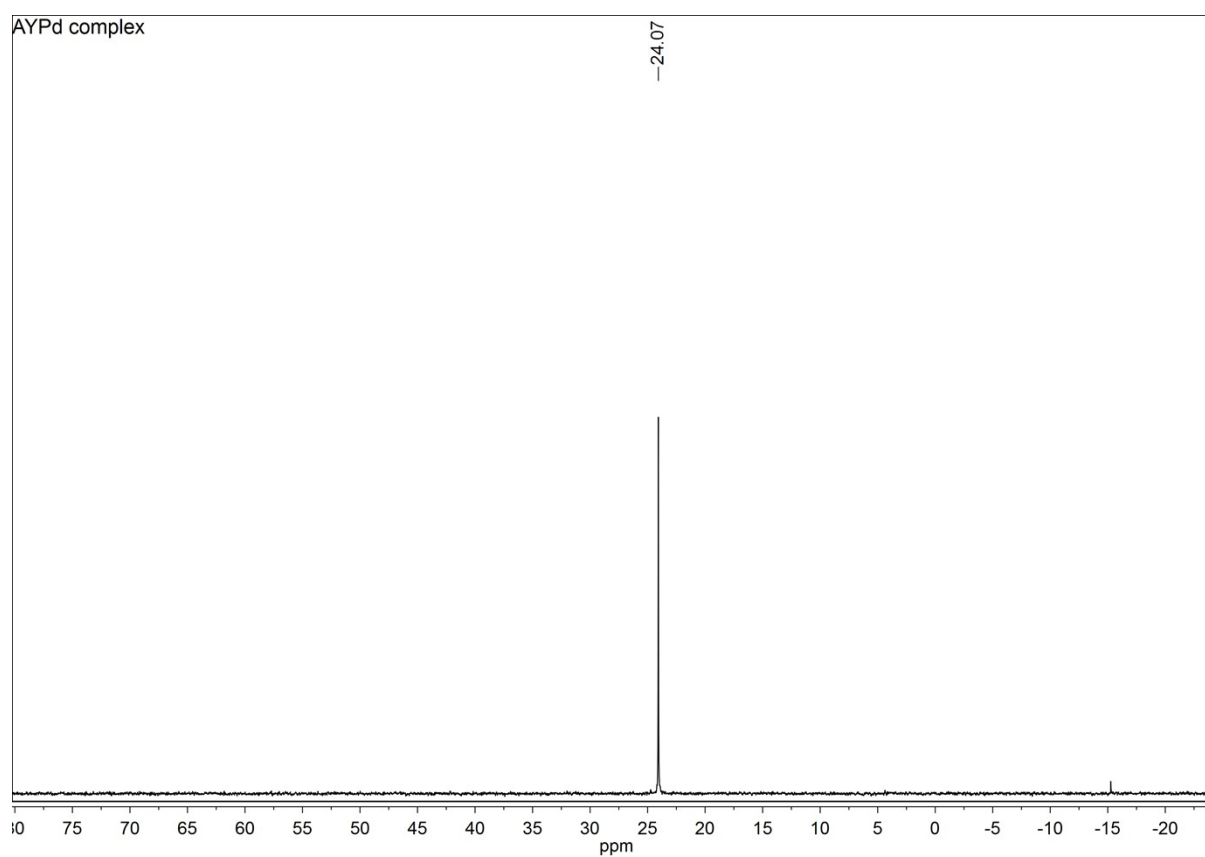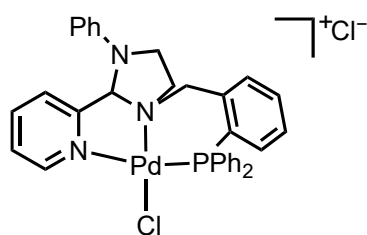

Figure S 23. Elemental analysis of [Pd(NNP)Cl][Cl].

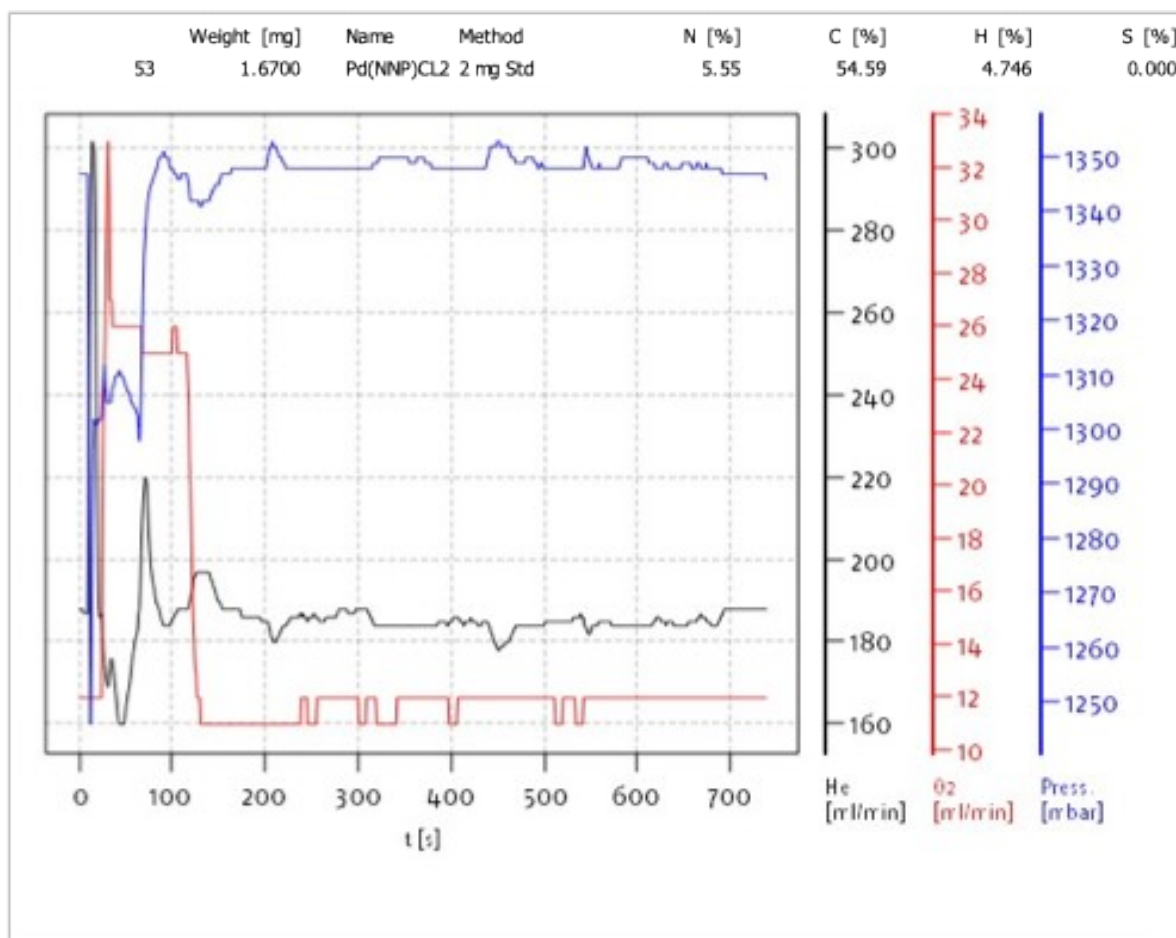

Elemental analysis calculated (%) for  $C_{33}H_{30}Cl_2N_3PPd \cdot 0.8CH_2Cl_2$ : C, 54.50; H, 4.28; N, 5.64. Found: C, 54.59; H, 4.74; N, 5.55.

Figure S 24. ESI-MS of [Pd(NNP)Cl][Cl]

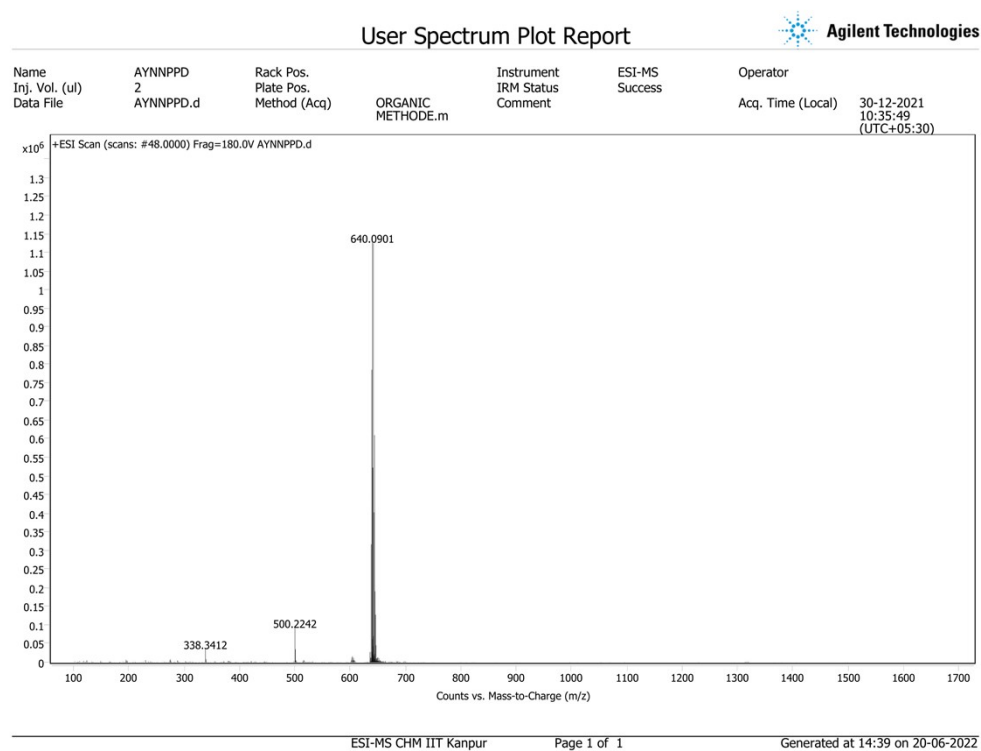

High resolution ESI-MS:  $m/z$  for  $[M-Cl]^+ = 640.0891$  (calcd. 640.091) =  $[PdC_{33}H_{30}ClN_3P]^+$ .

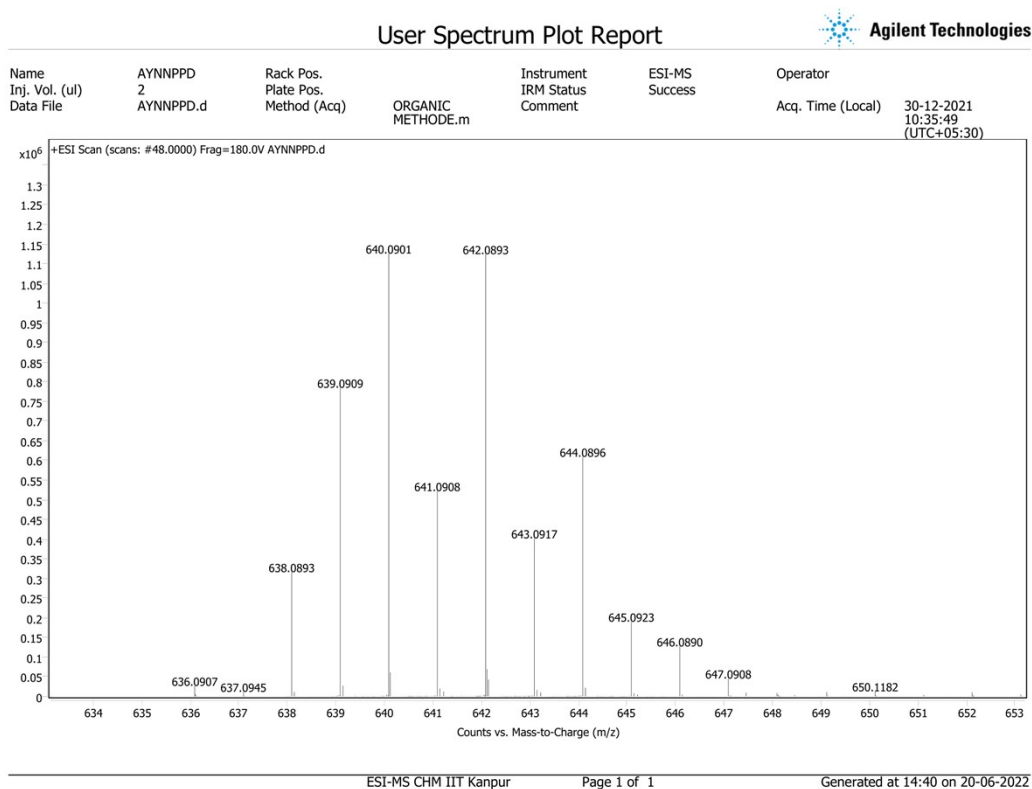

Figure S 25. Simulated ESI-MS of [Pd(NNP)Cl][Cl]

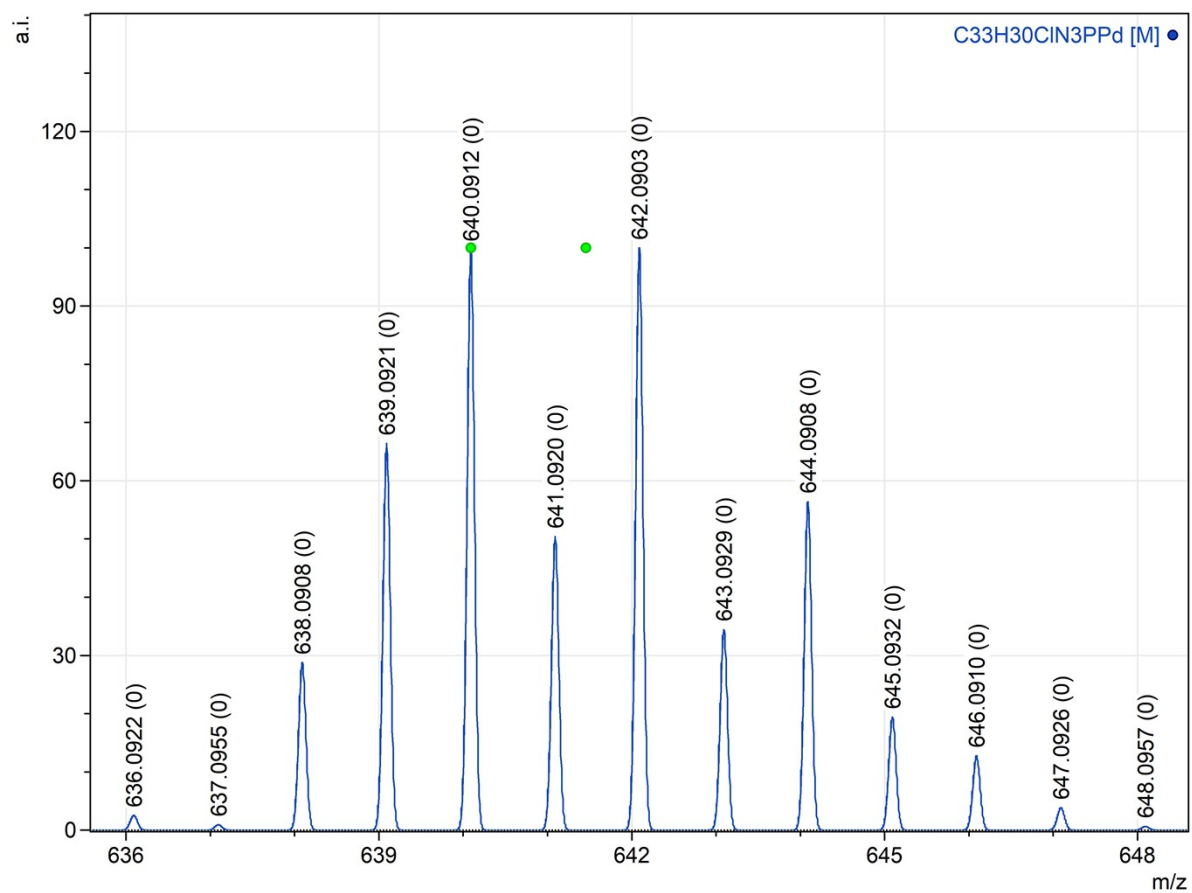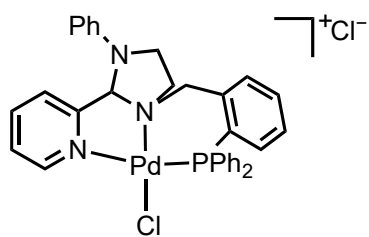



Figure S 26.  $^1\text{H}$  NMR spectrum of the  $[\text{Pd}(\text{NNP})(\text{SPhCH}_3)][\text{Cl}]$  in  $\text{CDCl}_3$  at 298 K.

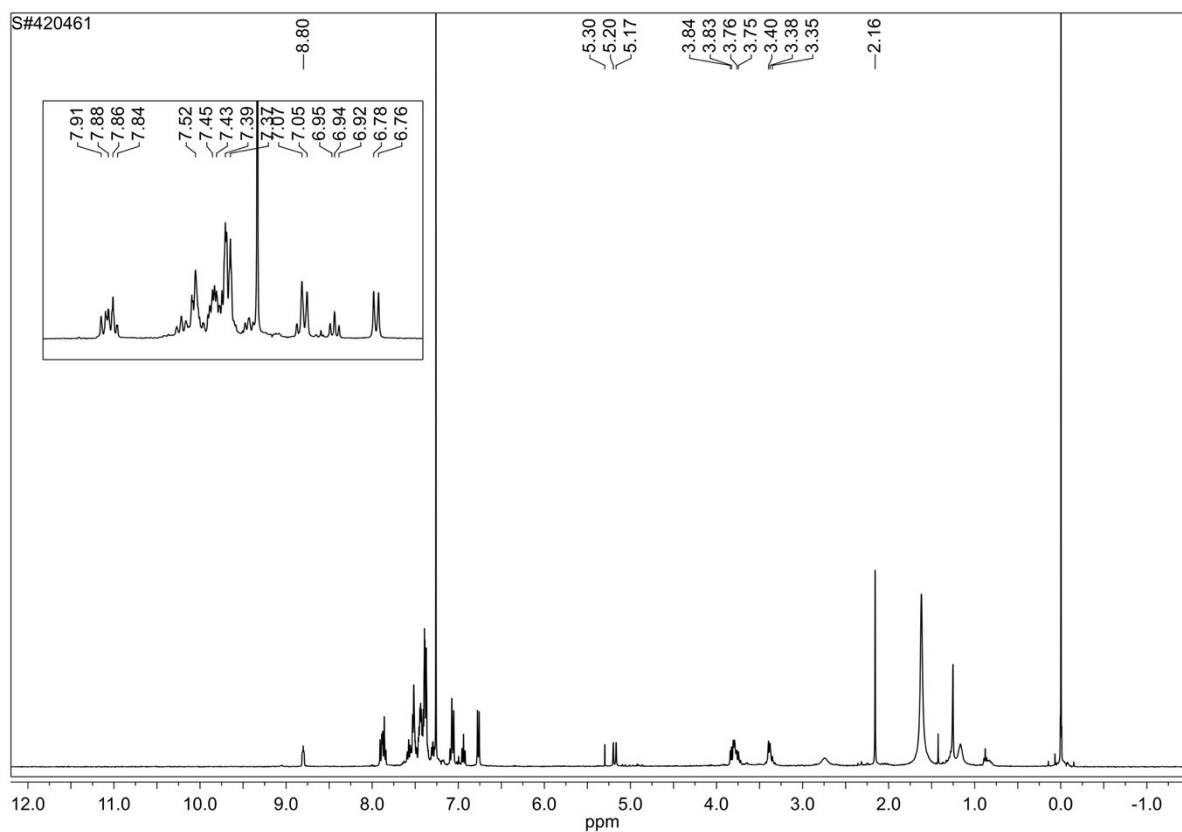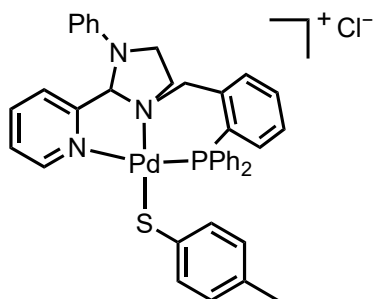

Figure S 27.  $^{13}\text{C}$  NMR spectrum of the  $[\text{Pd}(\text{NNP})(\text{SPhCH}_3)]^+[\text{Cl}]^-$  in  $\text{CDCl}_3$  at 298 K.

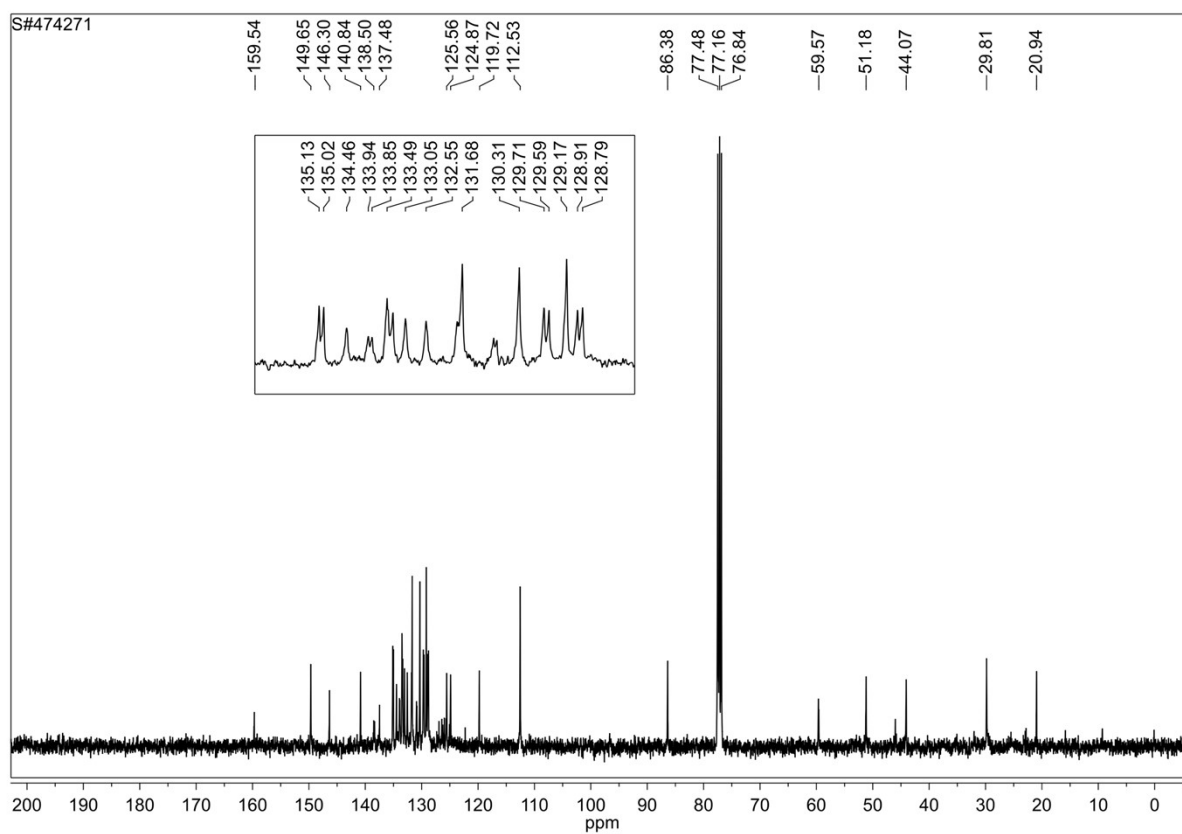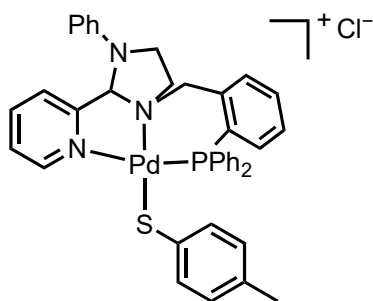

Figure S 28.  $^{31}\text{P}$  NMR spectrum of the  $[\text{Pd}(\text{NNP})(\text{SPhCH}_3)][\text{Cl}]$  in  $\text{CDCl}_3$  at 298 K.

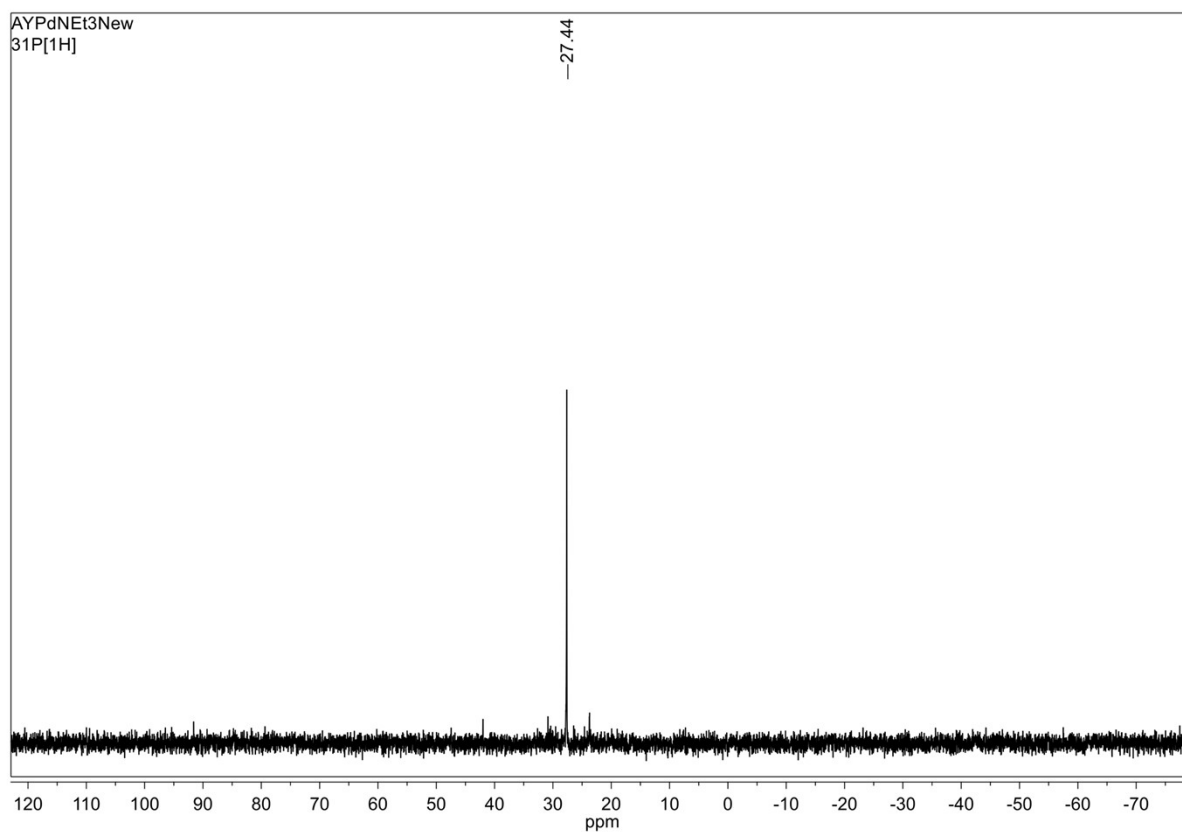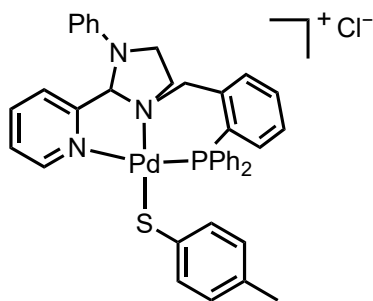

Figure S 29. ESI-MS of  $[\text{Pd}(\text{NNP})(\text{SPhCH}_3)]^+[\text{Cl}]^-$

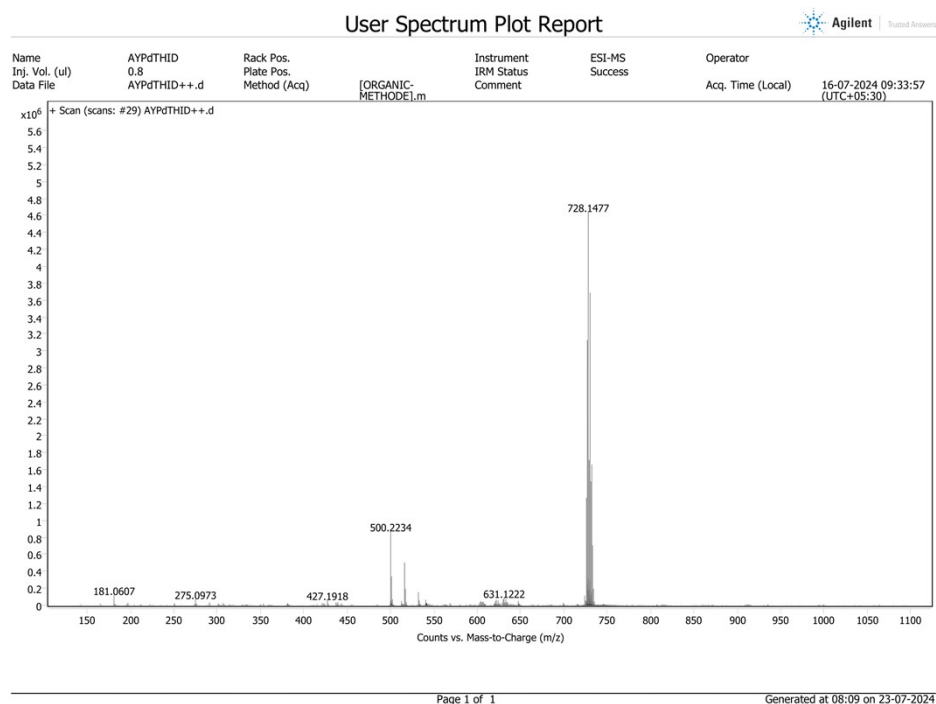

High resolution ESI-MS:  $m/z$  for  $[\text{M}-\text{Cl}]^+ = 728.1477$  (calcd. 728.1481) =  $[\text{PdC}_{40}\text{H}_{37}\text{N}_3\text{SP}]^+$ .

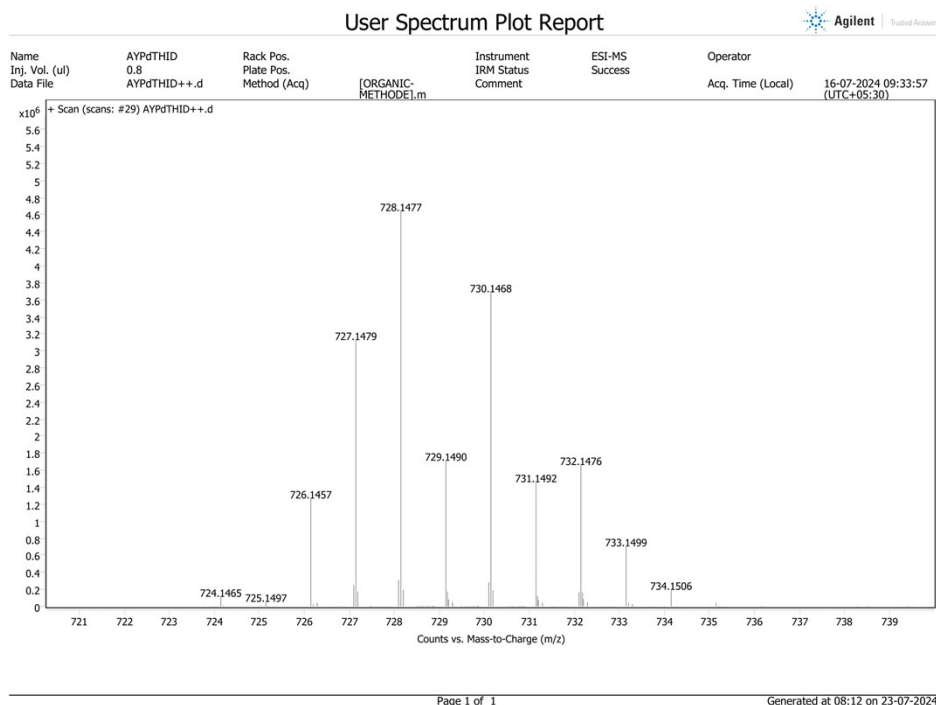

Figure S 30. Simulated ESI-MS of [(NNP)Pd(SPhCH<sub>3</sub>)]<sup>+</sup>[Cl]<sup>-</sup>

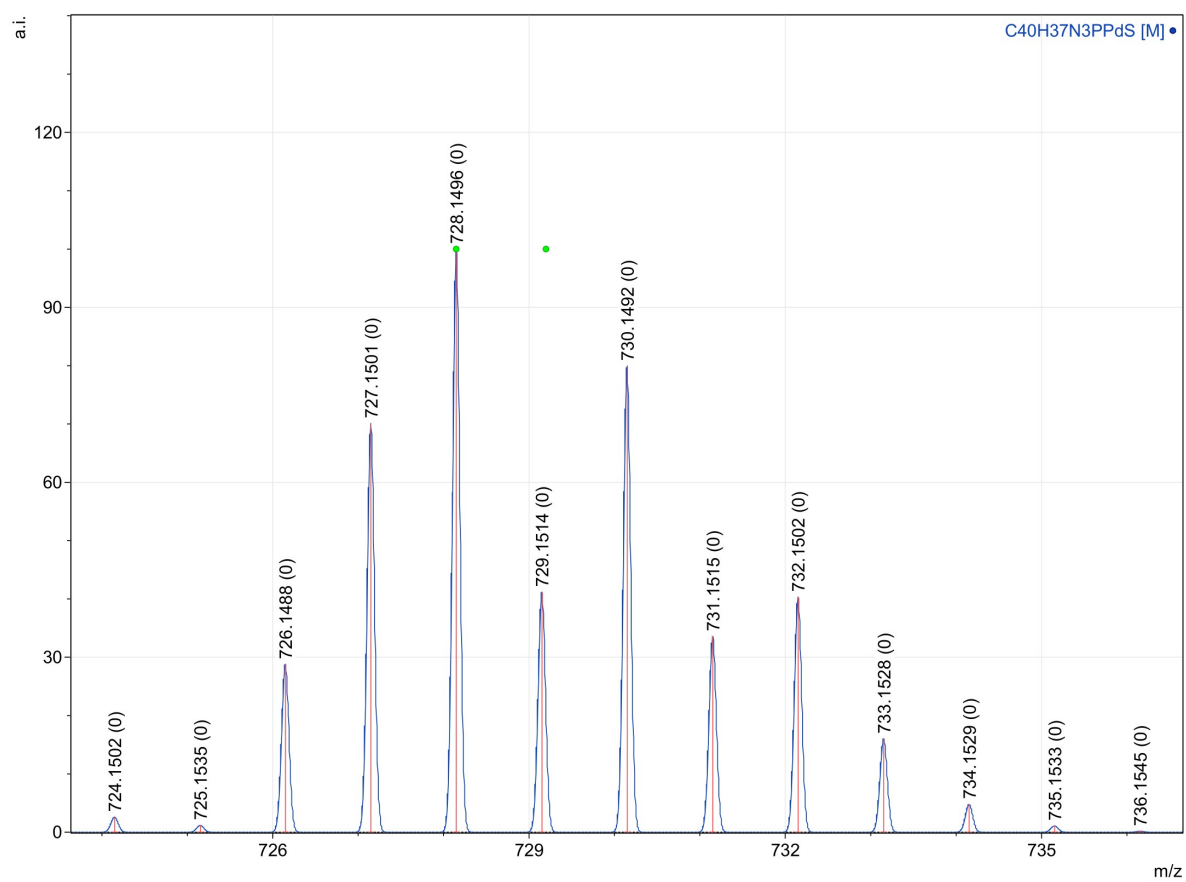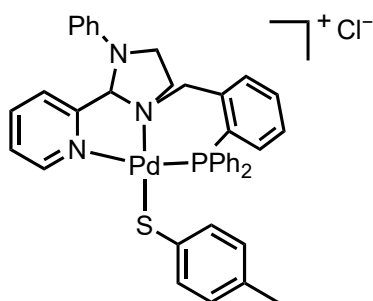

Figure S 31.  $^1\text{H}$  NMR spectrum of the  $[\text{Pd}(\text{NNP})(\text{SPhCH}_3)]^+[\text{PF}_6]^-$  in  $\text{CDCl}_3$  at 298 K.

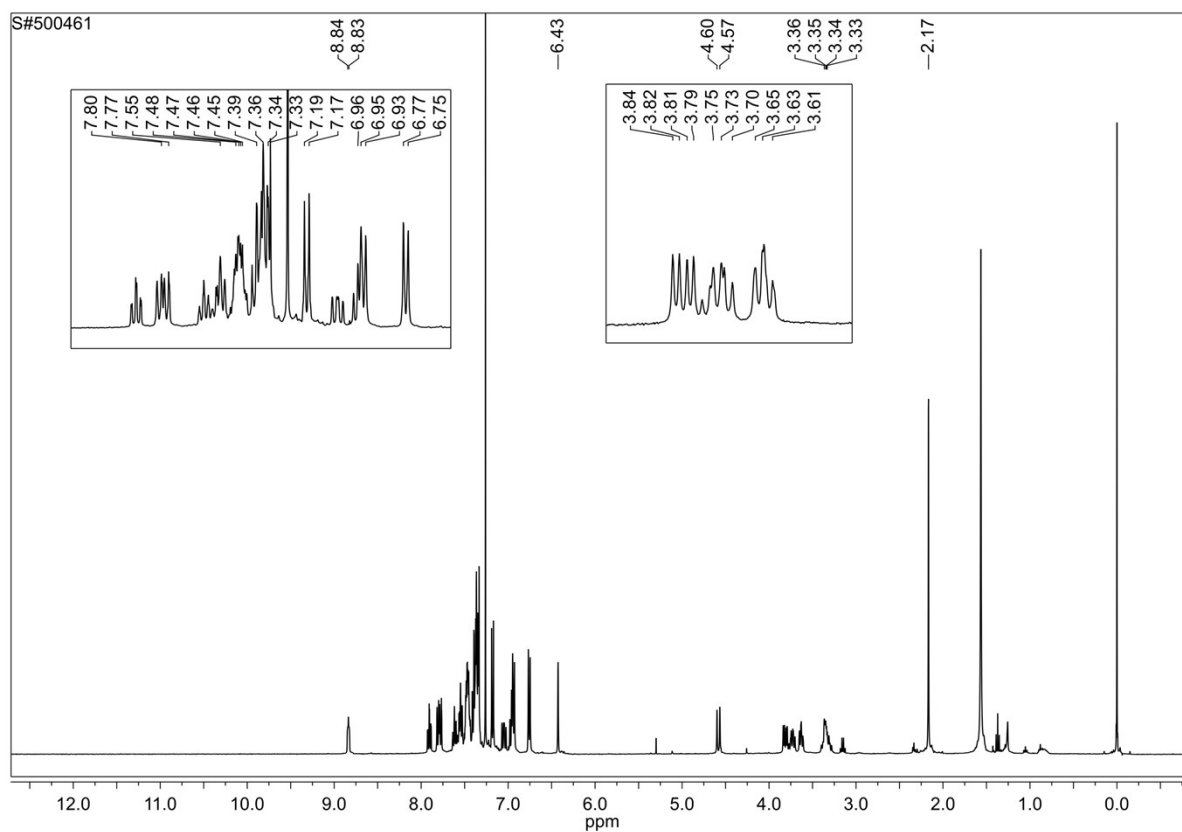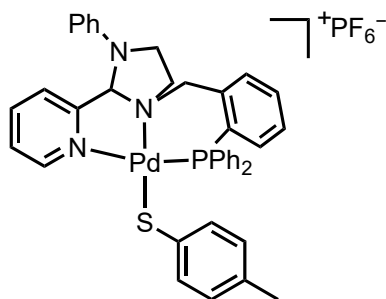

Figure S 32.  $^{31}\text{P}$  NMR spectrum of the  $[\text{Pd}(\text{NNP})(\text{SPhCH}_3)][\text{PF}_6]$  in  $\text{CDCl}_3$  at 298 K.

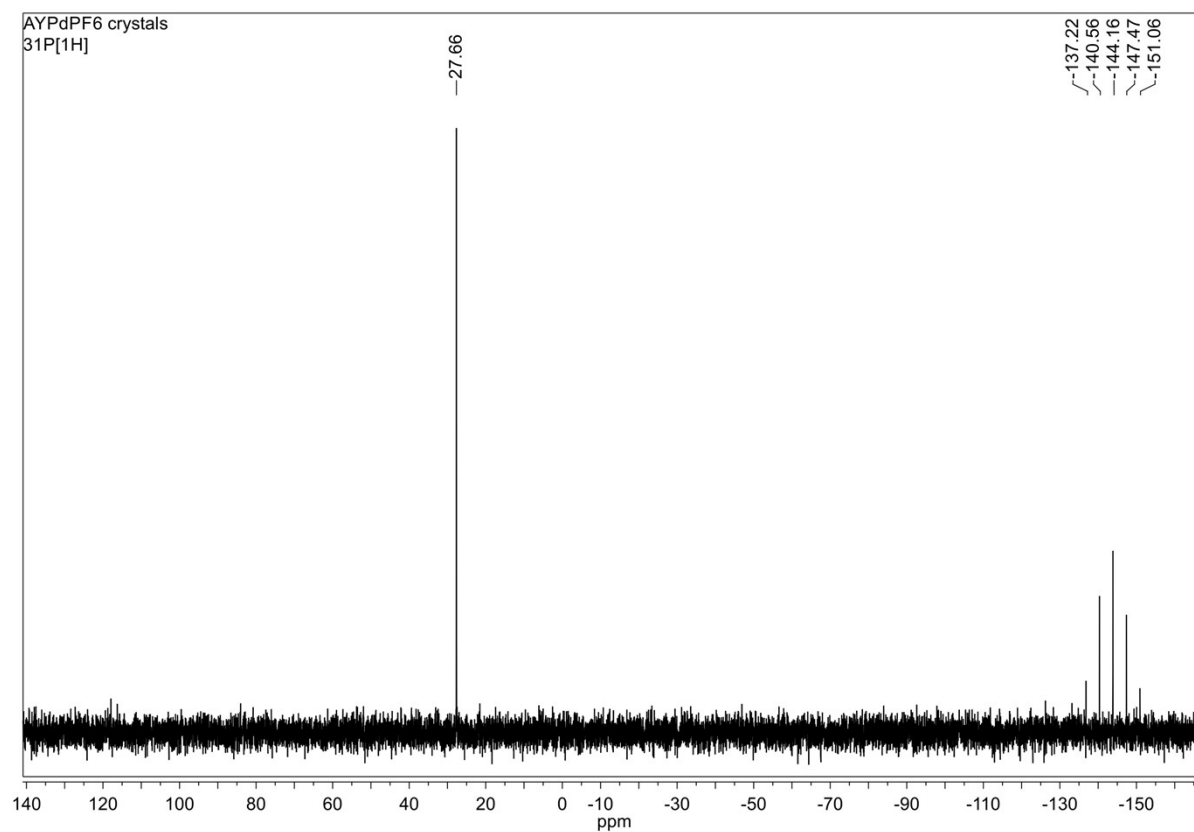

Figure S 33.  $^1\text{H}$  NMR spectrum of  $[\text{Ru}(\text{NNP})(\text{PPh}_3)\text{Cl}_2]$  complex in  $\text{CDCl}_3$  at 298 K.

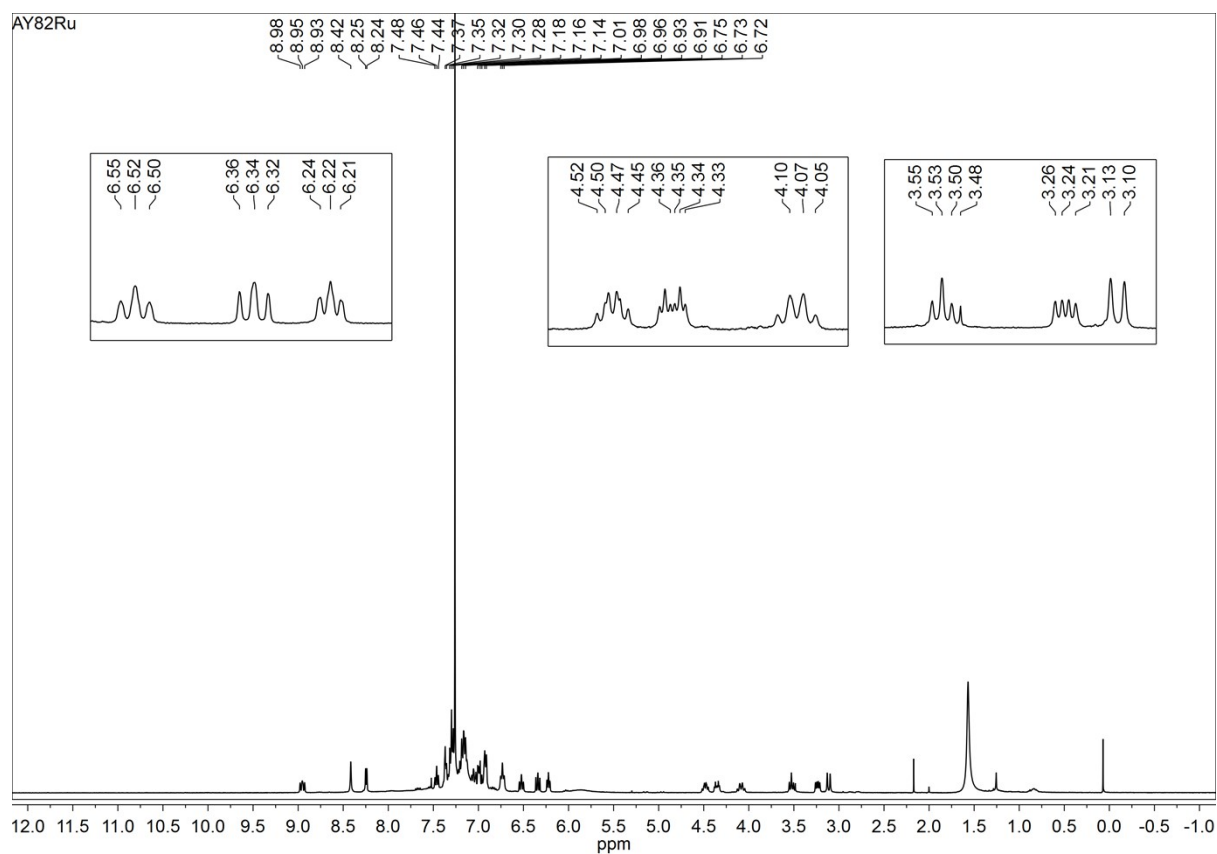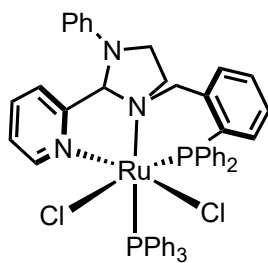



Figure S 34.  $^{31}\text{P}$  NMR spectrum of  $[\text{Ru}(\text{NNP})(\text{PPh}_3)\text{Cl}_2]$  complex in  $\text{CDCl}_3$  at 298 K.

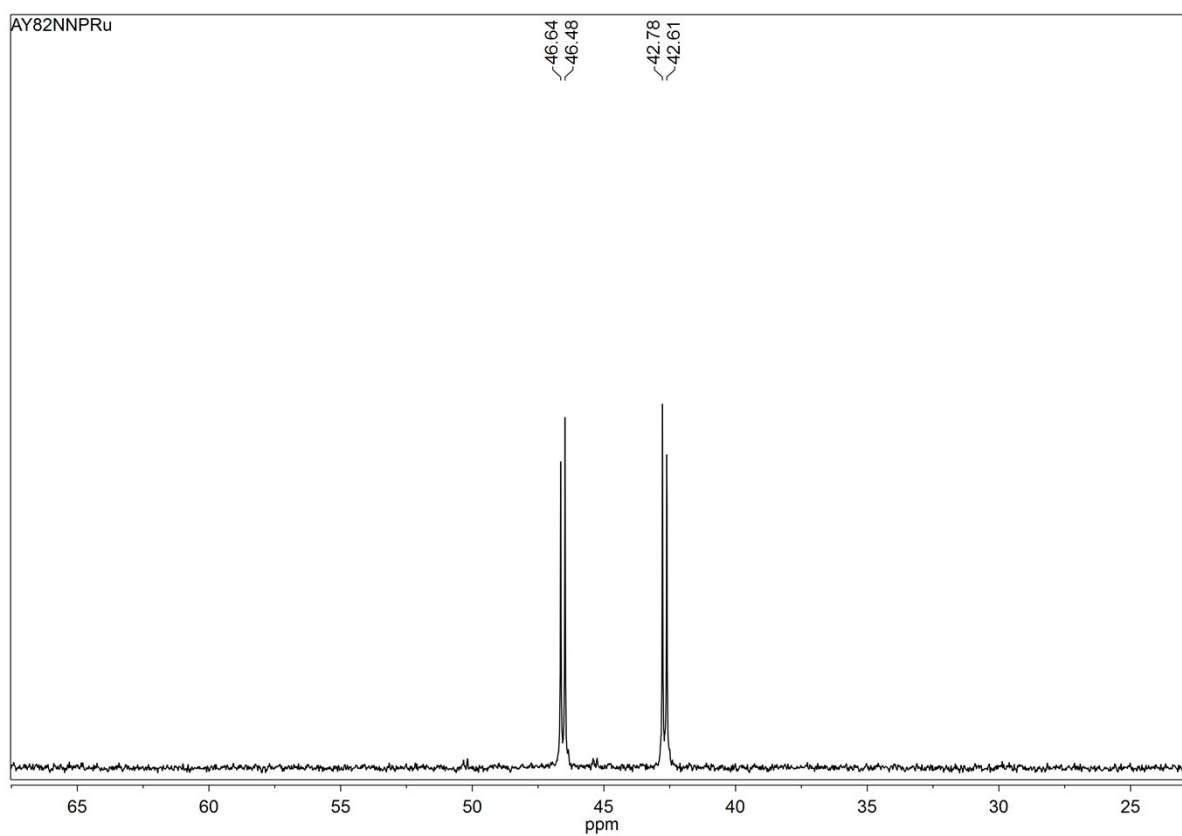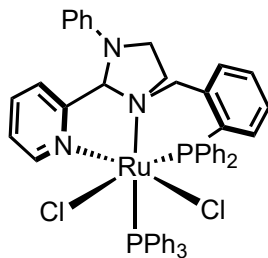

Figure S 35. Elemental analysis of  $[\text{Ru}(\text{NNP})(\text{PPh}_3)\text{Cl}_2]$  complex.

|             |                      |         |               |
|-------------|----------------------|---------|---------------|
| DATE & TIME | 6/17/2022 2:08:38 PM | P_ID    | 17062022      |
| SAMPLE ID   | RUCL2NNP             | USER ID | Administrator |
| WEIGHT (mg) | .630                 | MODE    | CHN           |
| SIGNALS     |                      |         |               |
|             |                      | ZR      | 14072         |
| CARBON      | 63.97%               | NR      | 14263         |
| HYDROGEN    | 4.72%                | CR      | 21289         |
| NITROGEN    | 4.48%                | HR      | 22815         |
| BLANKS      | 100                  | 229     | 19            |
| K FACTORS   | 17.185               | 43.637  | 6.090         |
| FILL        | COMB                 | BOOST1  | BOOST2        |
| 0           | 0                    | 0       | 0             |
| FILL TIME   | 34 Seconds           |         |               |

Elemental analysis calculated (%) for  $\text{C}_{51}\text{H}_{45}\text{Cl}_2\text{N}_3\text{P}_2\text{Ru} \cdot 0.6 \text{ CH}_2\text{Cl}_2$ : C, 63.93; H, 4.73; N, 4.27. Found: C, 63.97; H, 4.72; N, 4.48.

Figure S 36. ESI-MS of  $[\text{Ru}(\text{NNP})(\text{PPh}_3)\text{Cl}_2]$

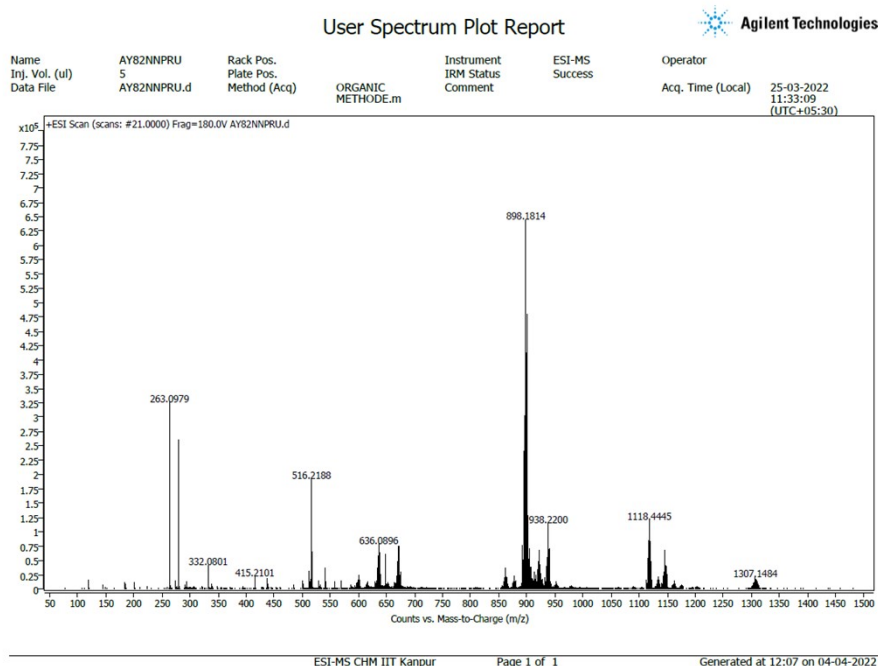

High resolution ESI-MS:  $m/z$  for  $[\text{M}-\text{Cl}]^+ = 898.1814$  (calcd. 898.1821) =  $[\text{RuC}_{51}\text{H}_{45}\text{ClN}_3\text{P}_2]^+$ ;  $m/z = 636.0896$  (calcd. 636.0909) =  $[\text{M}-(\text{PPh}_3+\text{Cl})]^+$ ;  $m/z = 516.2188$  (calcd. 516.2205) =  $[\text{NNP}=\text{O}+\text{H}]^+$ ;  $m/z = 263.0976$  (calcd. 263.0990) =  $[\text{PPh}_3+\text{H}]^+$ ;  $m/z = 938.2200$  (calcd. 938.2214) =  $[\text{Ru}(\text{NNP})(\text{O}=\text{PPh}_3)-2\text{Cl}+\text{CH}_3\text{COO}]^+$ . The  $\text{CH}_3\text{COO}^-$  likely originates from the formic acid used to infuse the sample during measurement.

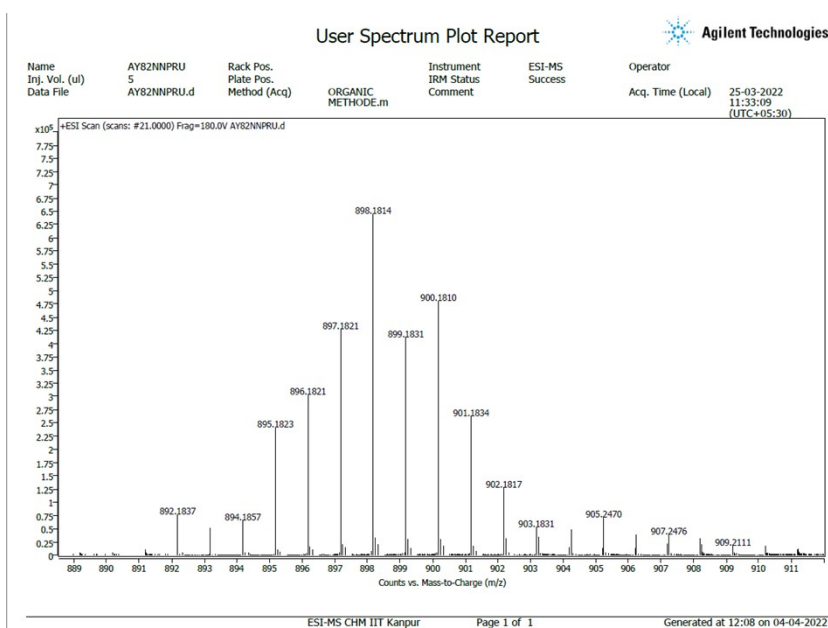

Figure S 37. Simulated ESI-MS of [Ru(NNP)(PPh<sub>3</sub>)Cl<sub>2</sub>].

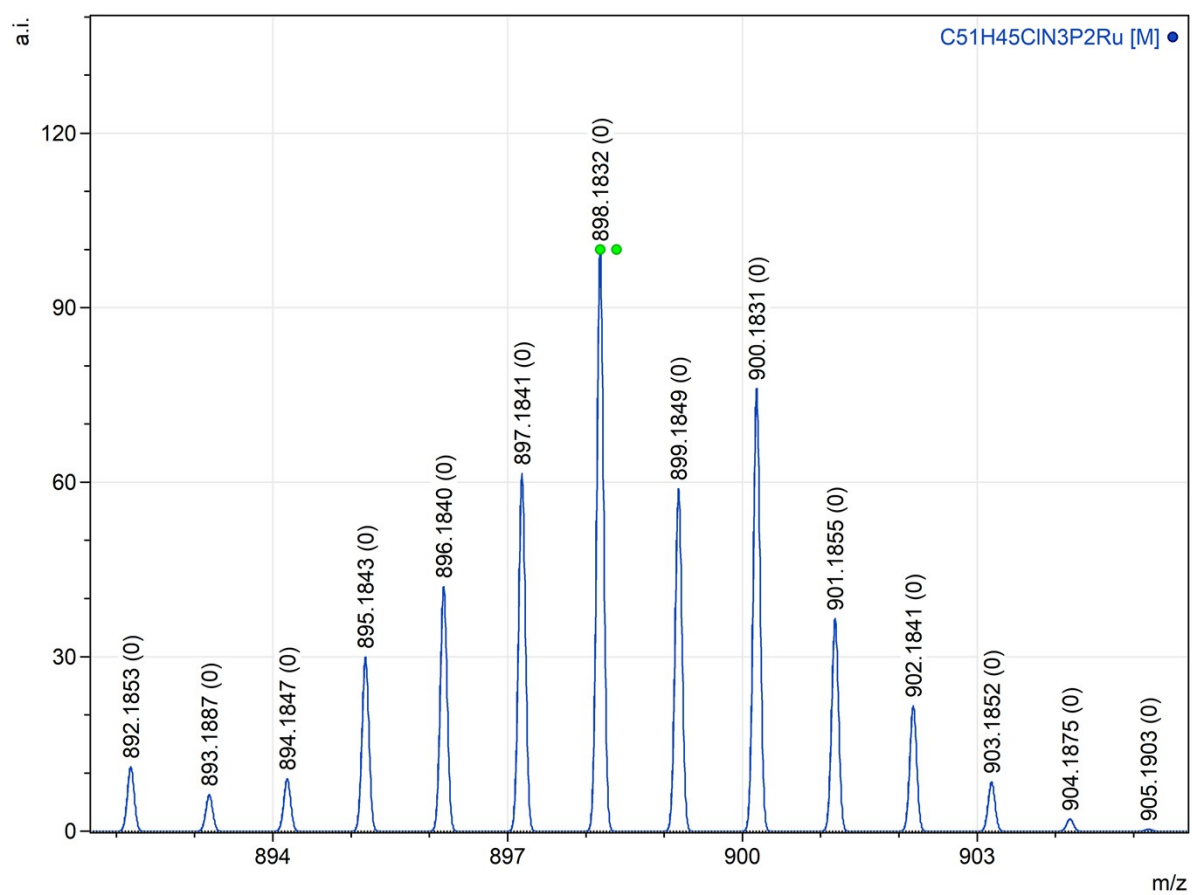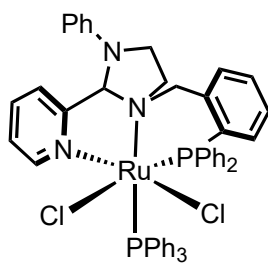

Figure S 38.  $^1\text{H}$  NMR spectrum of the *rac*-[(NNP)Ru(H)(CO)Cl] (crude) in  $\text{CDCl}_3$  at 298 K.

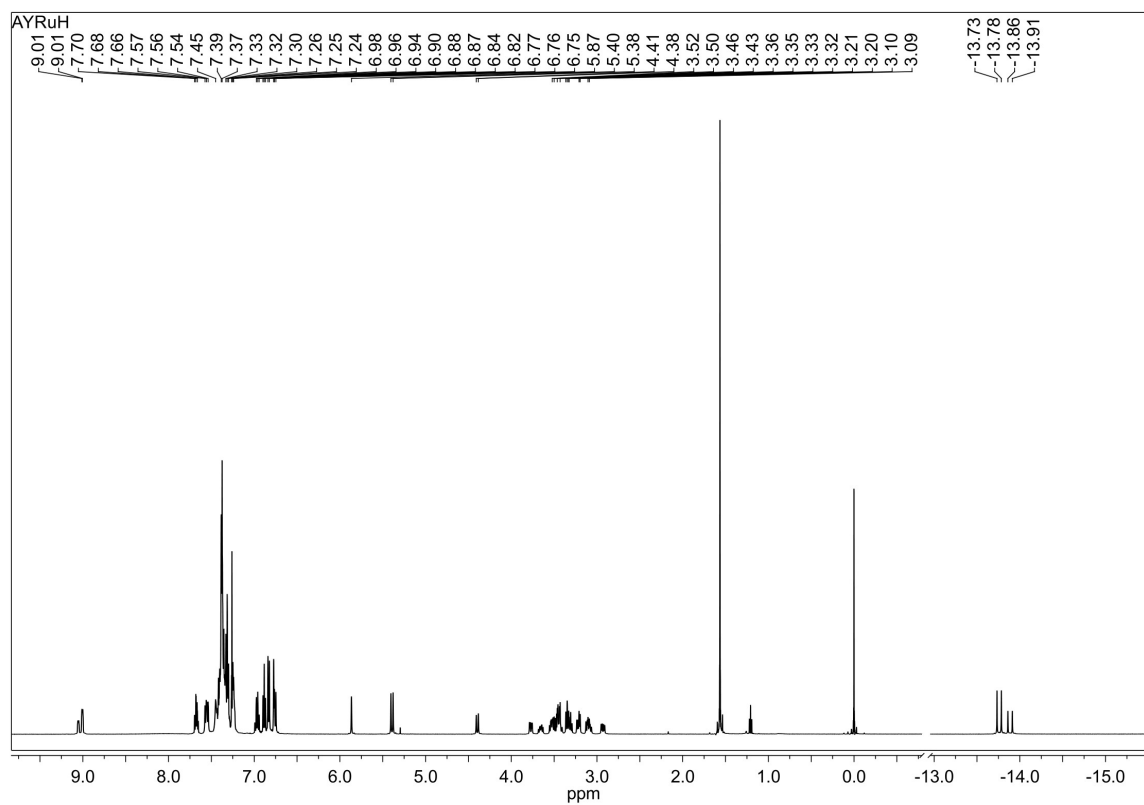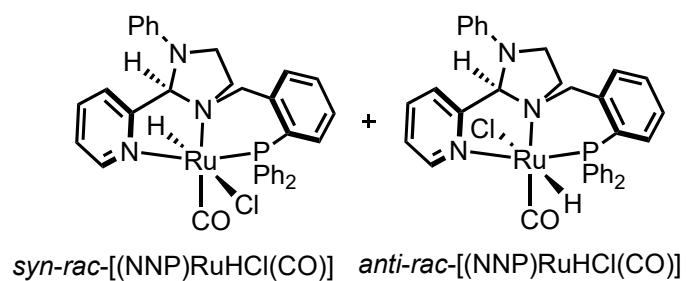

Figure S 39.  $^{31}\text{P}$  NMR spectrum of the *rac*-[Ru(NNP)(H)Cl(CO)] (crude) in  $\text{CDCl}_3$  at 298 K.

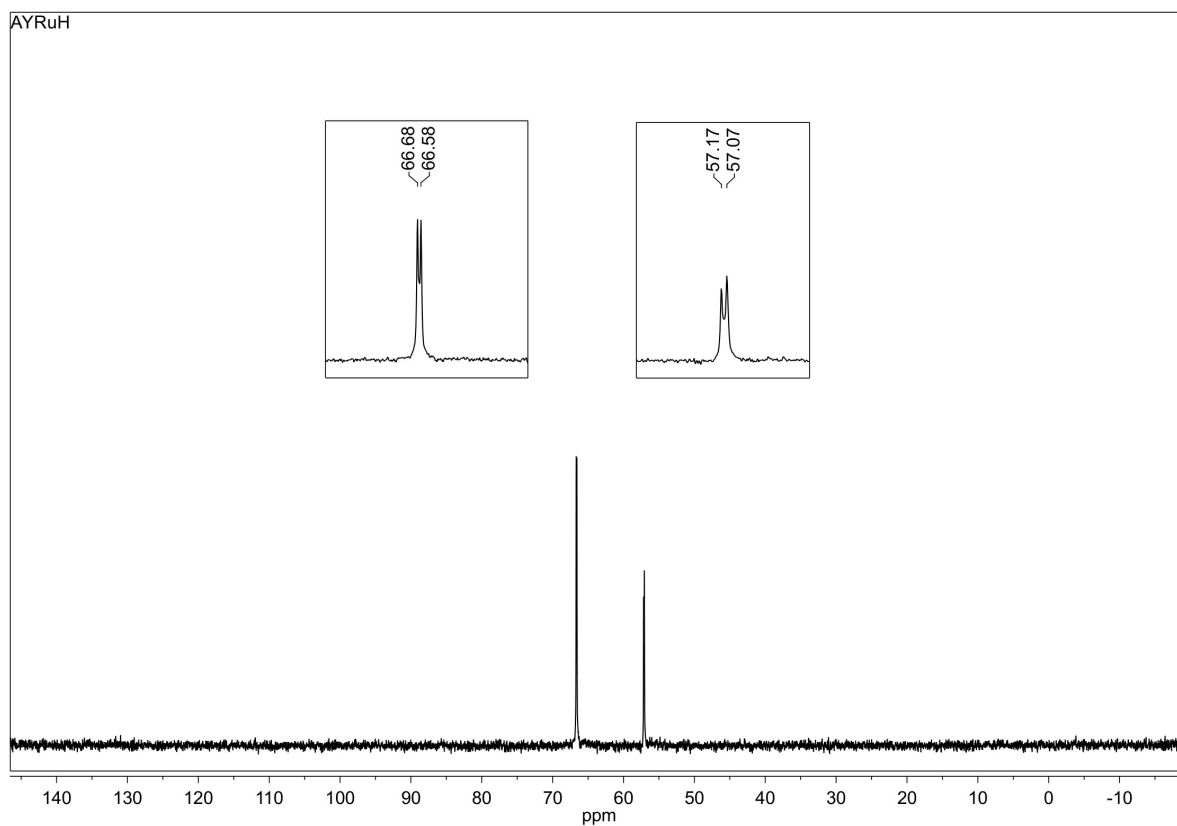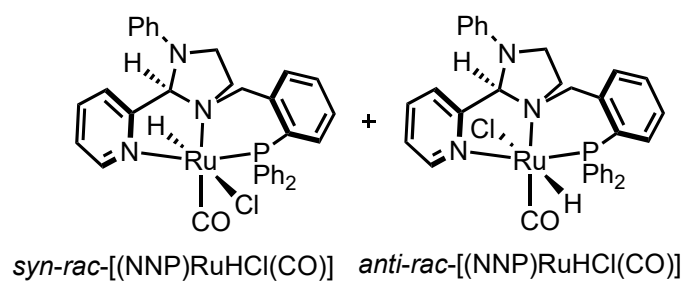

Figure S 40.  $^1\text{H}$  NMR spectrum of the *anti-rac*-[Ru(NNP)(H)Cl(CO)] in  $\text{CDCl}_3$  at 298 K.

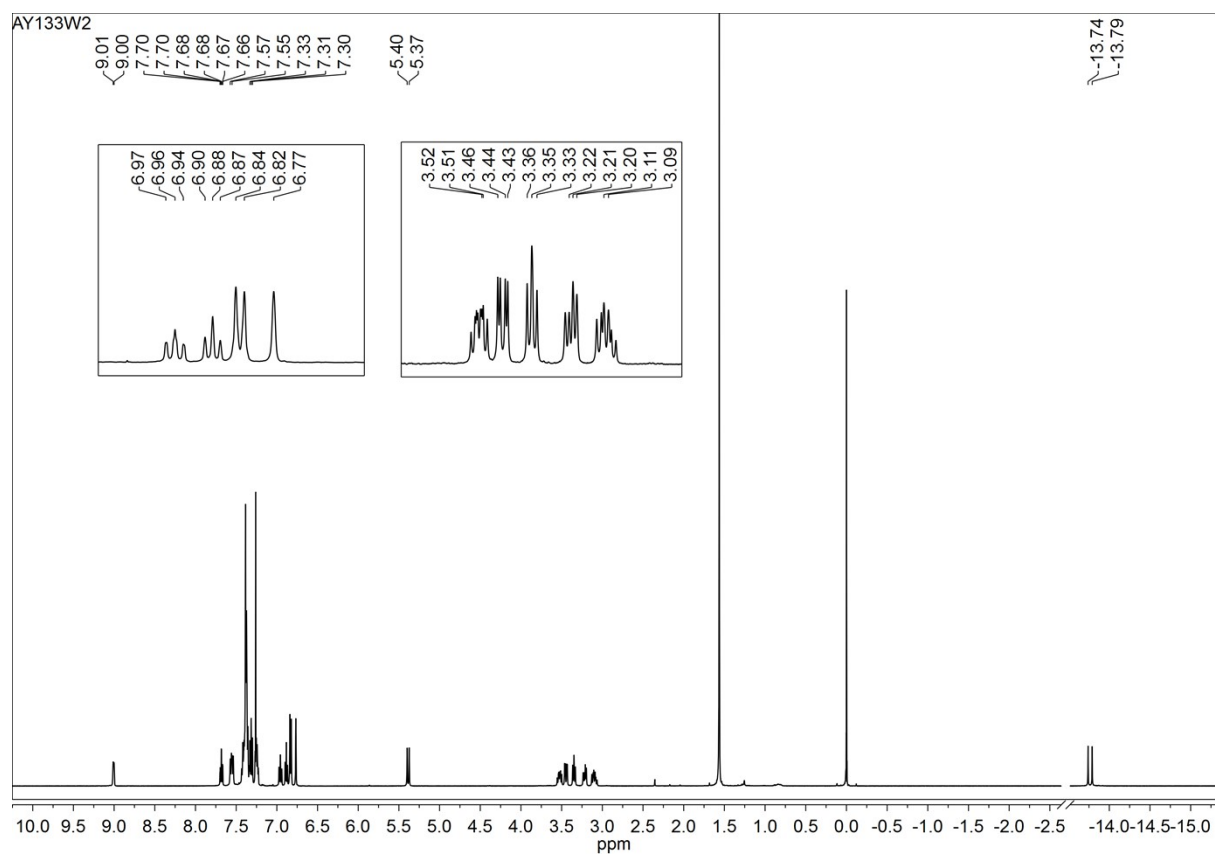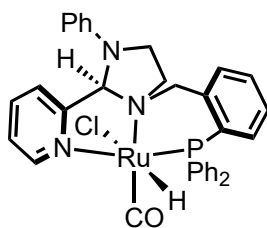

Figure S 41.  $^{31}\text{P}$  NMR spectrum of the *anti-rac*-[Ru(NNP)(H)Cl(CO)] in  $\text{CDCl}_3$  at 298 K.

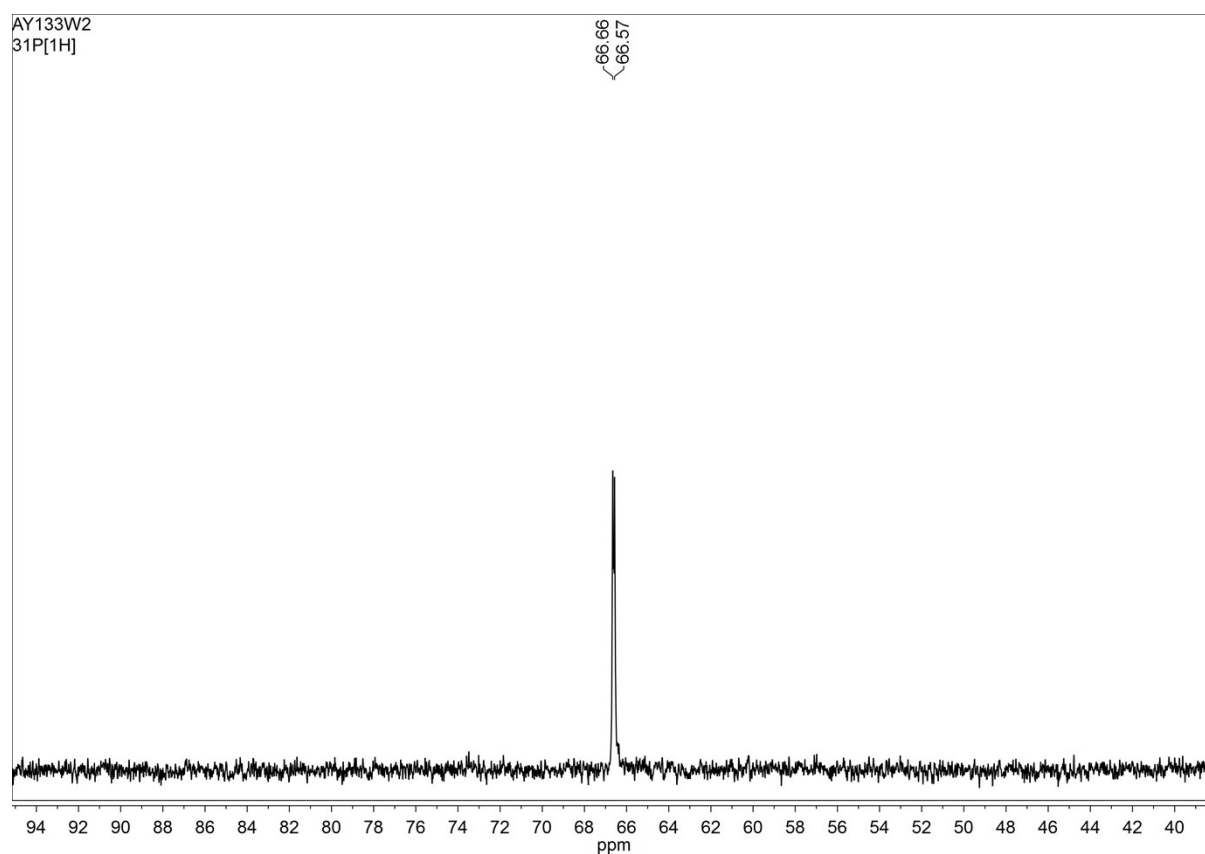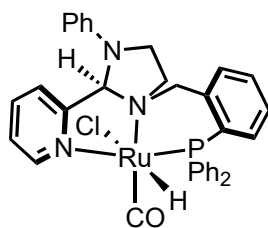



Figure S 42.  $^1\text{H}$  NMR spectrum of the *syn-rac*-[Ru(NNP)(H)Cl(CO)] in  $\text{CDCl}_3$  at 298 K.

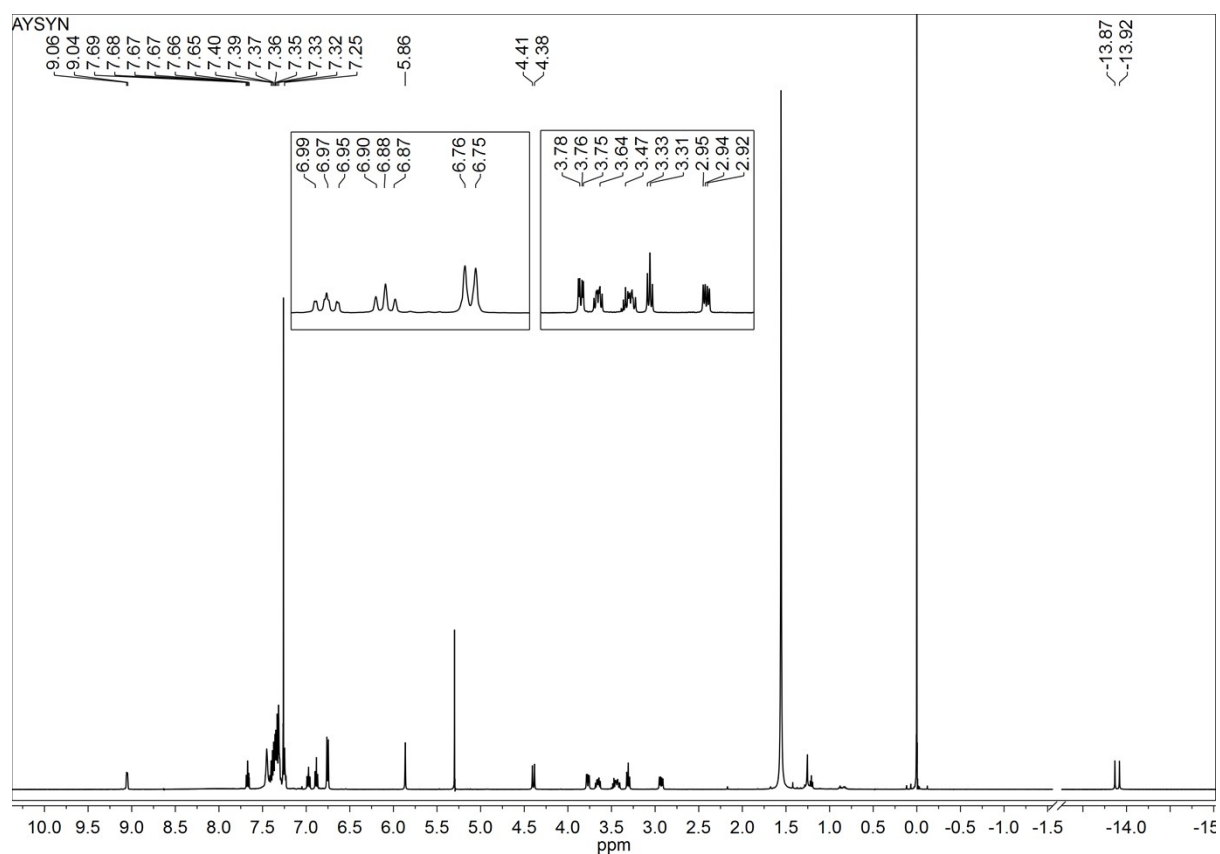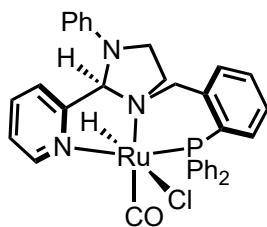

Figure S 43.  $^{31}\text{P}$  NMR spectrum of the *syn-rac*-[Ru(NNP)(H)Cl(CO)] in  $\text{CDCl}_3$  at 298 K.

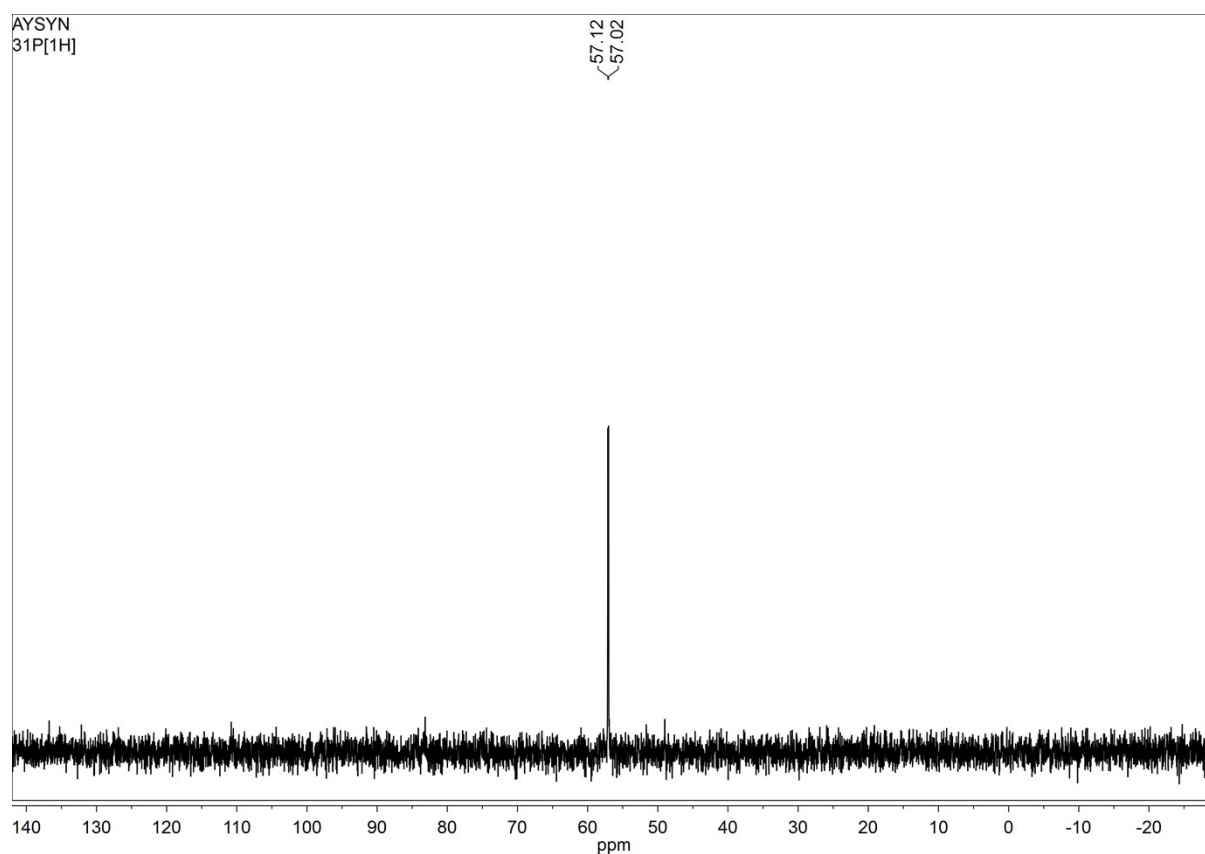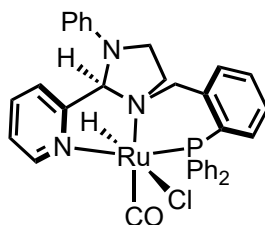

Figure S 44. Elemental analysis of [Ru(NNP)(H)Cl(CO)]

|             |                      |         |               |
|-------------|----------------------|---------|---------------|
| DATE & TIME | 6/17/2022 2:26:54 PM | P_ID    | 17062022      |
| SAMPLE ID   | RUHCLNNP             | USER ID | Administrator |
| WEIGHT (mg) | 1.630                | MODE    | CHN           |
| SIGNALS     |                      |         |               |
|             |                      | ZR      | 14070         |
|             |                      | NR      | 14664         |
|             |                      | CR      | 31225         |
|             |                      | HR      | 34983         |
| CARBON      | 58.77%               |         |               |
| HYDROGEN    | 4.96%                |         |               |
| NITROGEN    | 5.79%                |         |               |
| BLANKS      | 100                  | 229     | 19            |
| K FACTORS   | 17.185               | 43.637  | 6.090         |
| FILL        | COMB                 | BOOST1  | BOOST2        |
| 0           | 0                    | 0       | 0             |
| FILL TIME   | 34 Seconds           |         |               |

Elemental analysis calculated (%) for  $C_{34}H_{31}ClN_3OPRu \cdot 0.5CH_2Cl_2$ : C, 58.56; H, 4.56; N, 5.94.

Found: C, 58.77; H, 4.96; N, 5.79.

Figure S 45. FTIR of  $[\text{Ru}(\text{H})\text{Cl}(\text{CO})(\text{PPh}_3)_3]$

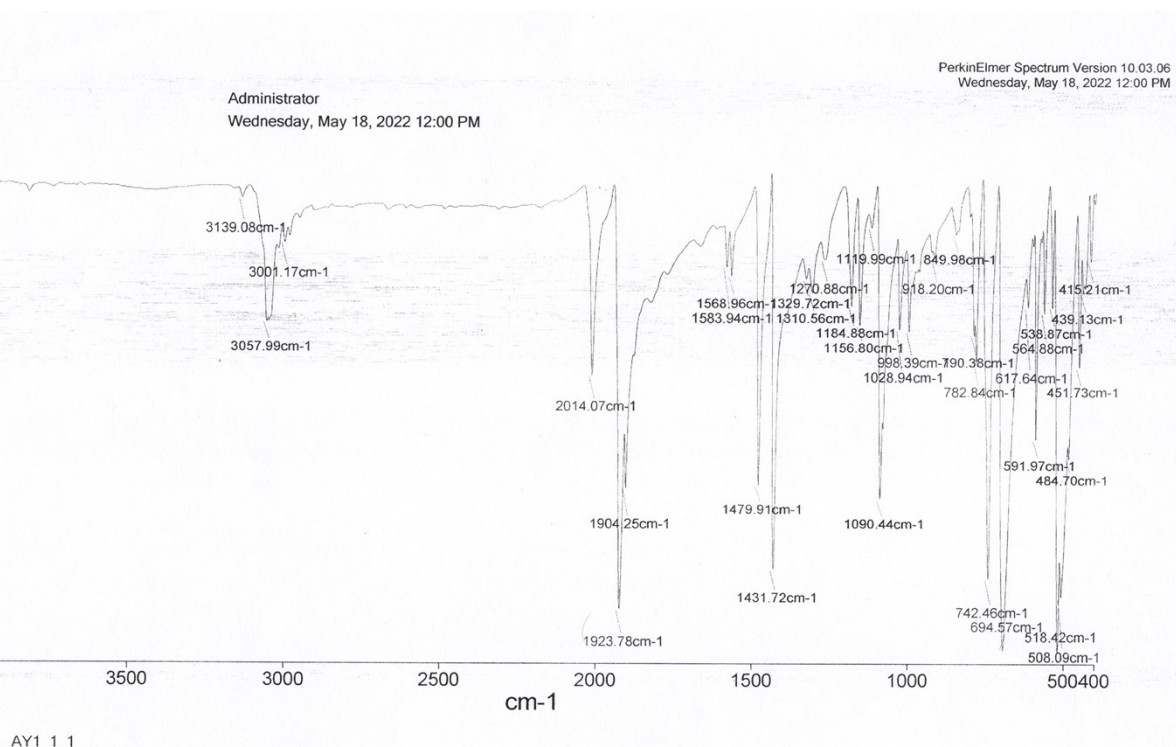

FTIR (KBr pellet)  $[\text{Ru}(\text{H})\text{Cl}(\text{CO})(\text{PPh}_3)_3]$ :  $\nu_{\text{Ru-H}} = 2014 \text{ cm}^{-1}$ ,  $\nu_{\text{CO}} = 1923 \text{ cm}^{-1}$ .

Figure S 46. FTIR of *syn* and *anti-rac*-[Ru(NNP)(H)Cl(CO)]

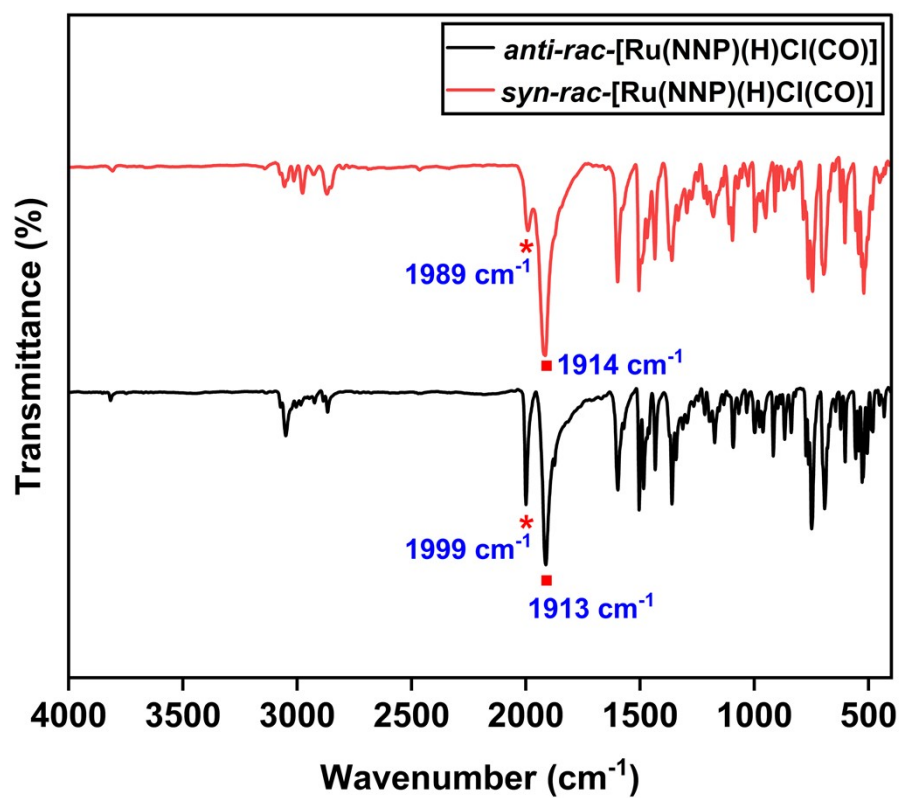

FTIR (KBr pellet) *syn-rac*-[Ru(NNP)(H)(CO)Cl]:  $\nu_{\text{Ru-H}} = 1989 \text{ cm}^{-1}$ ,  $\nu_{\text{CO}} = 1914 \text{ cm}^{-1}$ .

FTIR (KBr pellet) *anti-rac*-[Ru(NNP)(H)(CO)Cl]:  $\nu_{\text{Ru-H}} = 1999 \text{ cm}^{-1}$ ,  $\nu_{\text{CO}} = 1913 \text{ cm}^{-1}$ .

Figure S 47. ESI-MS of [Ru(NNP)(H)Cl(CO)]

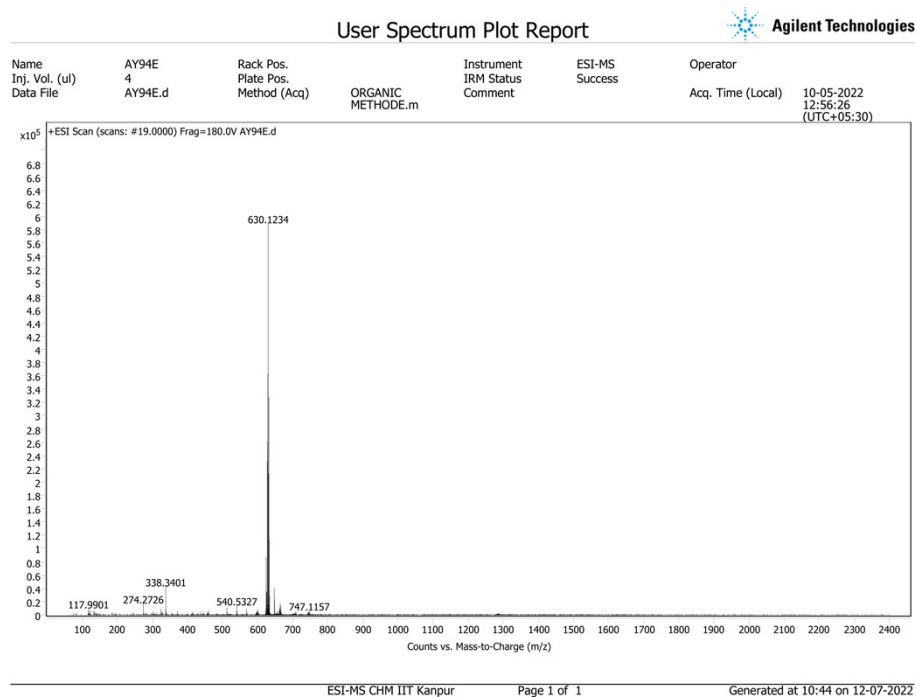

High resolution ESI-MS:  $m/z$  for  $[M-Cl]^+ = 630.1234$  (calcd. 630.1248) =  $[RuC_{34}H_{31}N_3OP]^+$ .

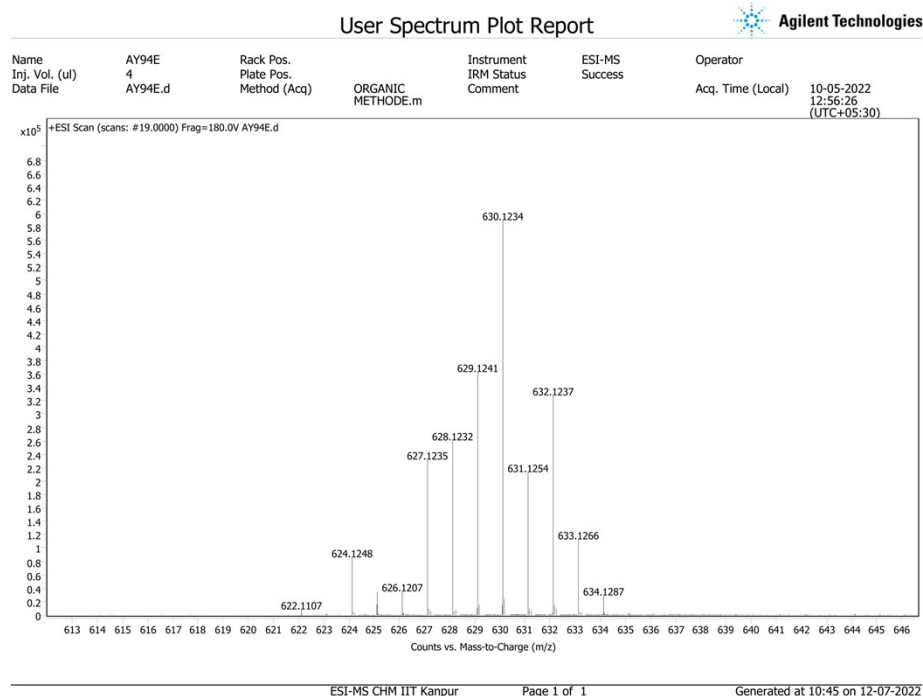

Figure S 48. Simulated ESI-MS of [Ru(NNP)(H)Cl(CO)]

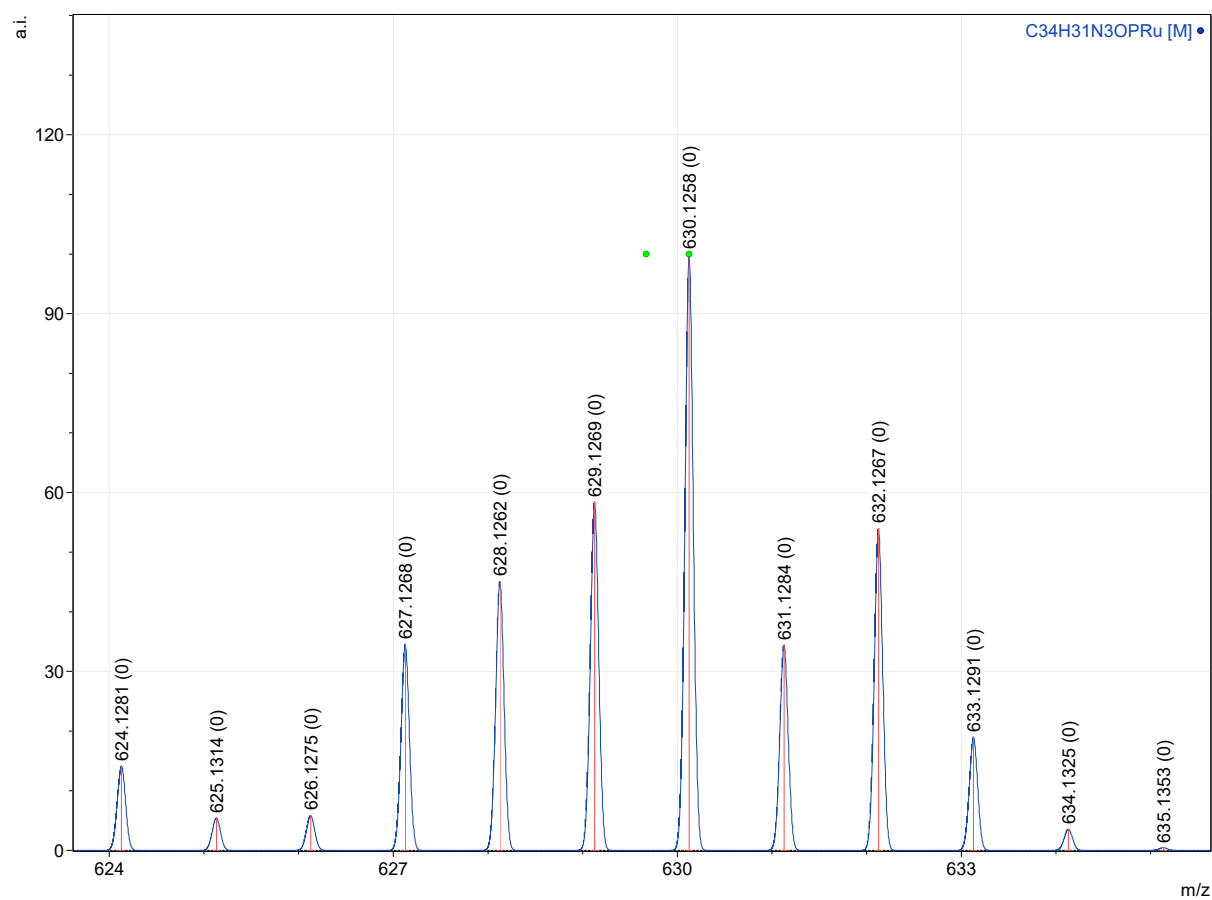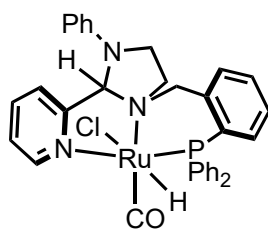

Figure S 49. Absorption spectra of *syn* and *anti-rac*-[Ru(NNP)(H)Cl(CO)]

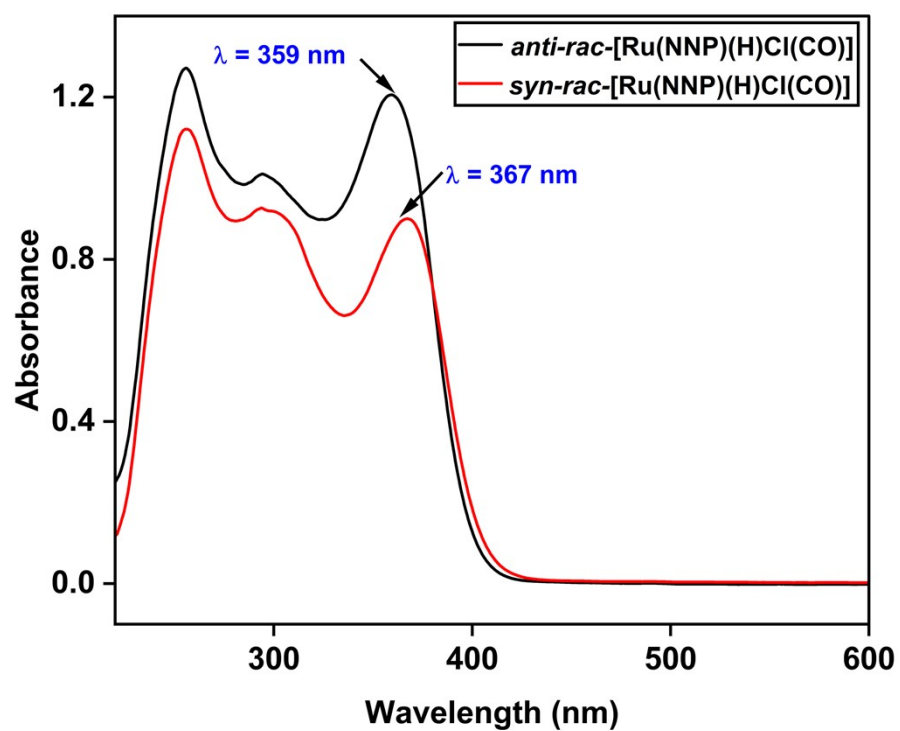

Absorption spectra of *syn* and *anti-rac*-[Ru(NNP)(H)Cl(CO)] in CH<sub>2</sub>Cl<sub>2</sub> at 0.125 mM concentration.



Figure S 50. Fluorescence spectrum of *syn* and *anti-rac*-[Ru(NNP)(H)Cl(CO)]

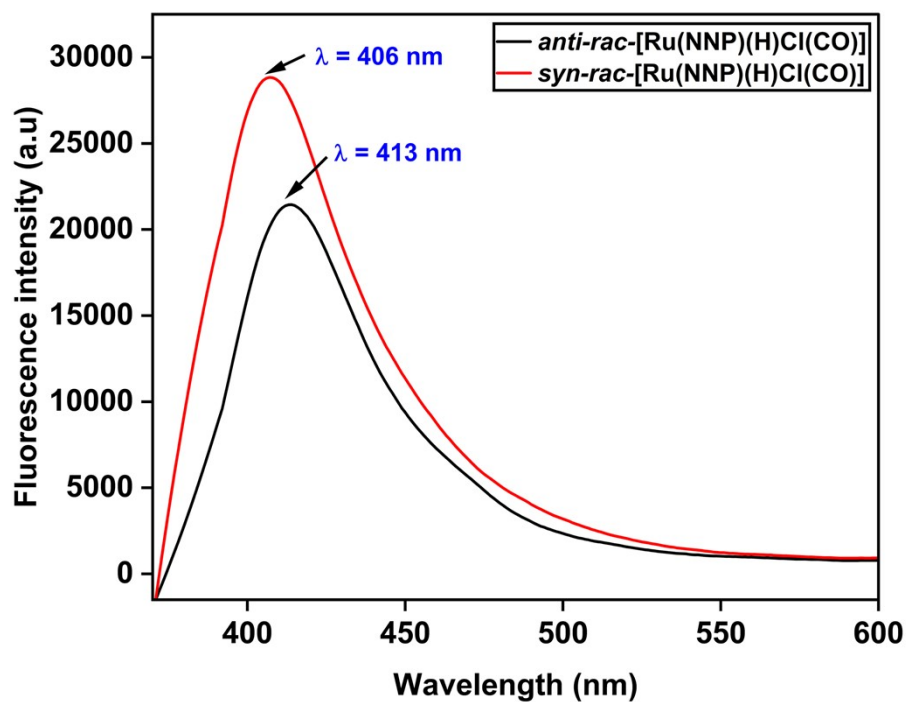

For *anti-rac*-[Ru(NNP)(H)Cl(CO)], upon excitation at  $\lambda_{\text{ex}} = 370$  nm in dichloromethane at 0.125 mM concentration at rt, gives rise to an emission band at  $\lambda_{\text{em}} = 406$  nm.

For *syn-rac*-[Ru(NNP)(H)Cl(CO)], upon excitation at  $\lambda_{\text{ex}} = 380$  nm in dichloromethane at 0.125 mM concentration at rt, gives rise to an emission band at  $\lambda_{\text{em}} = 413$  nm.

Figure S 51.  $^{31}\text{P}$  NMR spectrum for *anti-rac*-[Ru(NNP)(H)Cl(CO)] after adding  $\text{CS}_2$  in  $\text{CDCl}_3$  at 298 K.

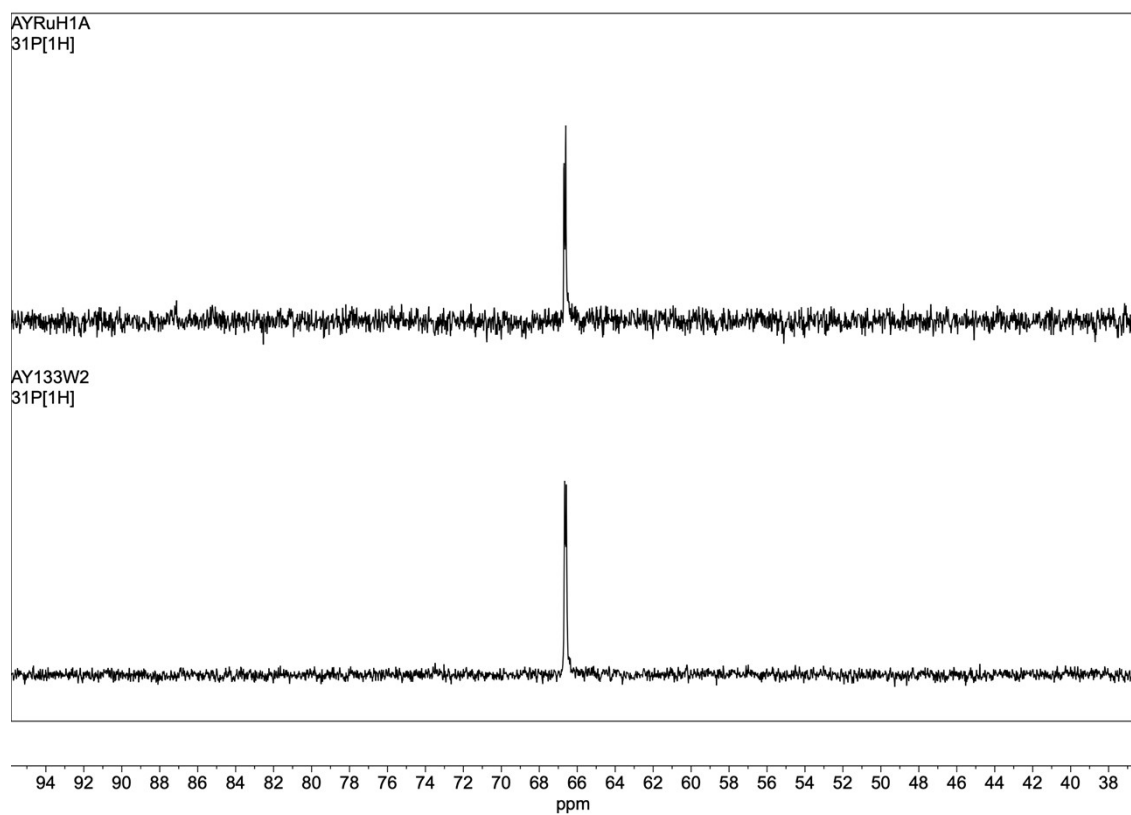

$^{31}\text{P}$  NMR spectrum for *anti-rac*-[Ru(NNP)(H)Cl(CO)] (bottom) and after the addition of  $\text{CS}_2$  (top). No peak shifting was observed.

Figure S 52.  $^{31}\text{P}$  NMR spectrum for *syn-rac*-[Ru(NNP)(H)Cl(CO)] after adding  $\text{CS}_2$  in  $\text{CDCl}_3$  at 298 K.

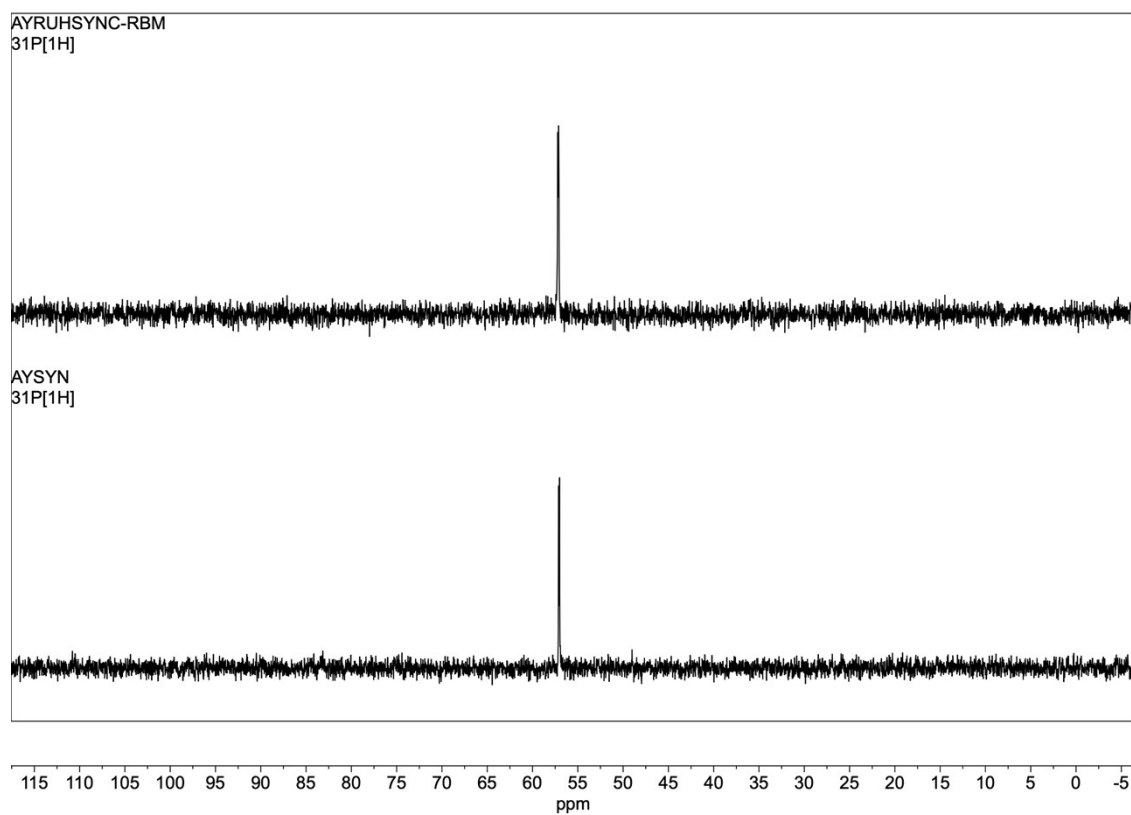

$^{31}\text{P}$  NMR spectrum for *syn-rac*-[Ru(NNP)(H)Cl(CO)] (bottom) and after the addition of  $\text{CS}_2$  (top). No peak shifting was observed.

Figure S 53.  $^1\text{H}$  NMR spectrum of *anti-rac*-[Ru(NNP)(H)( $\eta^1\text{-BH}_4$ )(CO)] complex in  $\text{CDCl}_3$  at 298 K.

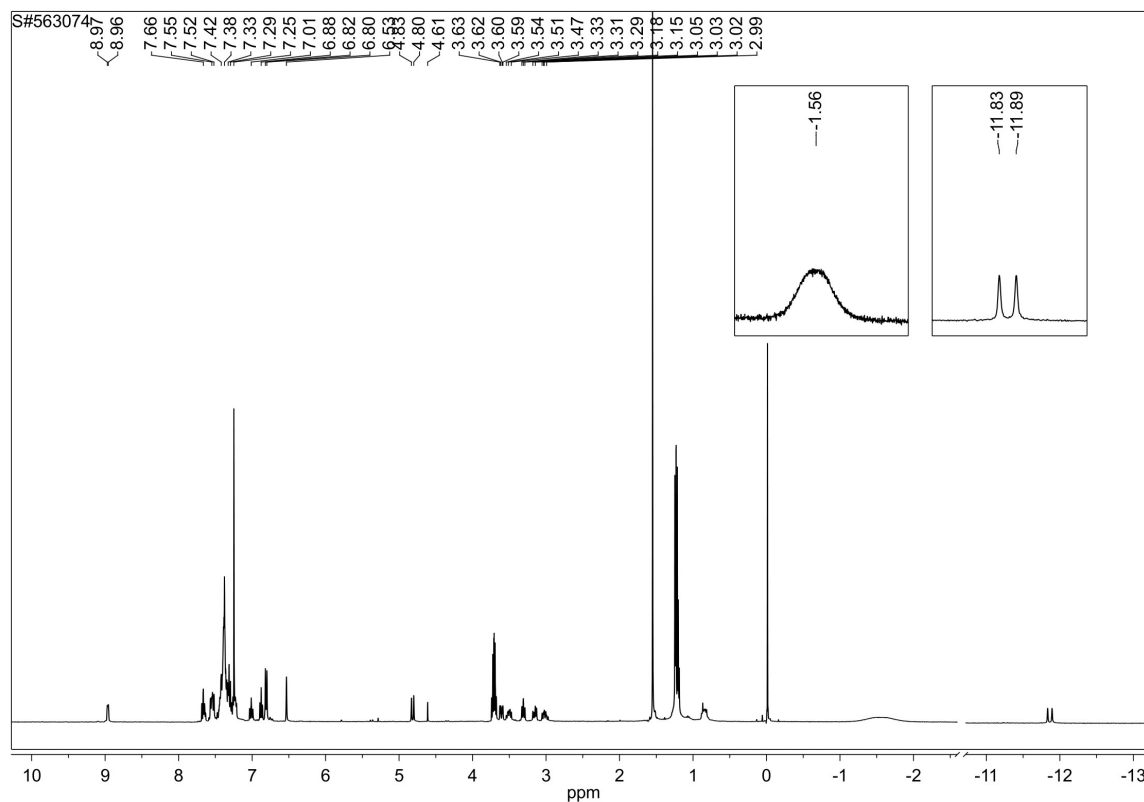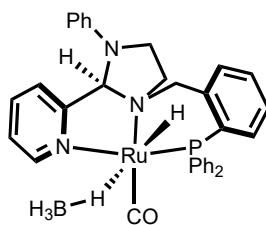

Figure S 54.  $^{31}\text{P}$  NMR spectrum of *anti-rac*-[Ru(NNP)(H)( $\eta^1\text{-BH}_4$ )(CO)] complex in  $\text{CDCl}_3$  at 298 K.

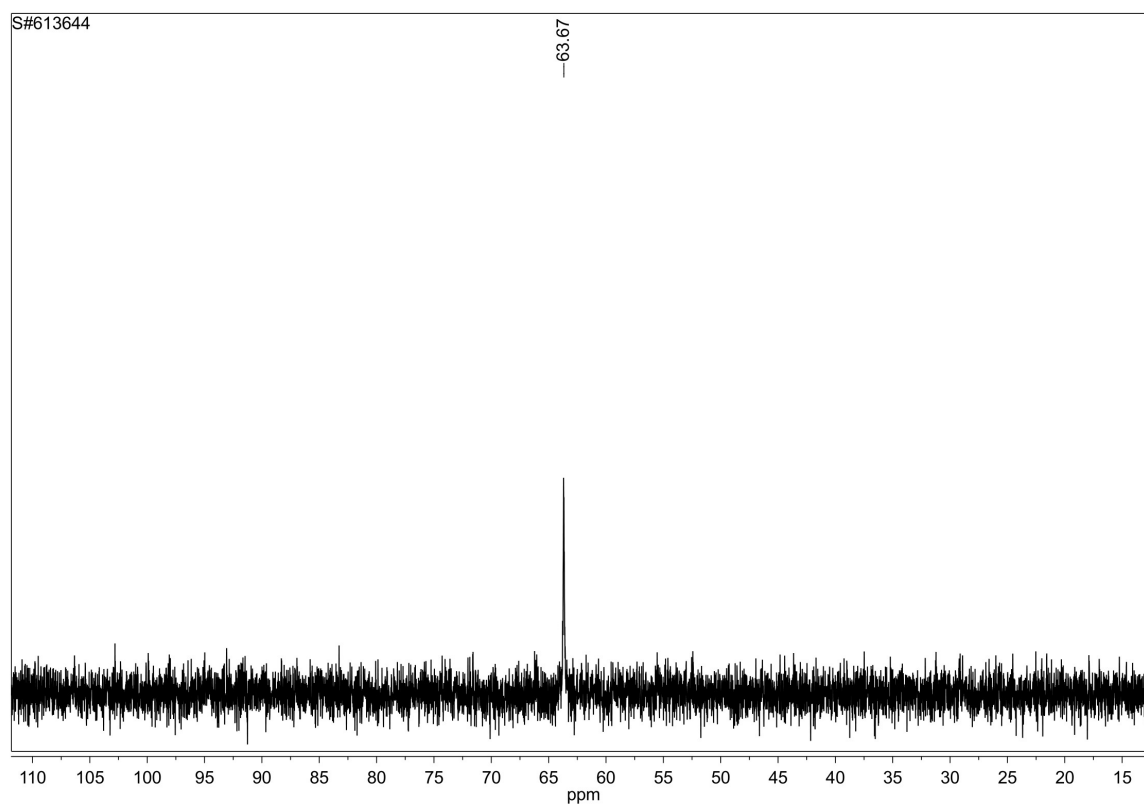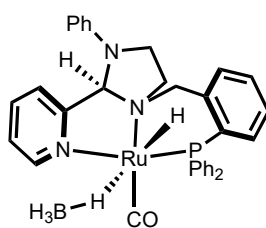

Figure S 55.  $^{31}\text{P}$  NMR spectrum of *syn-rac*-[Ru(NNP)(H)( $\eta^1\text{-BH}_4$ )(CO)] complex in  $\text{CDCl}_3$  at 298 K.

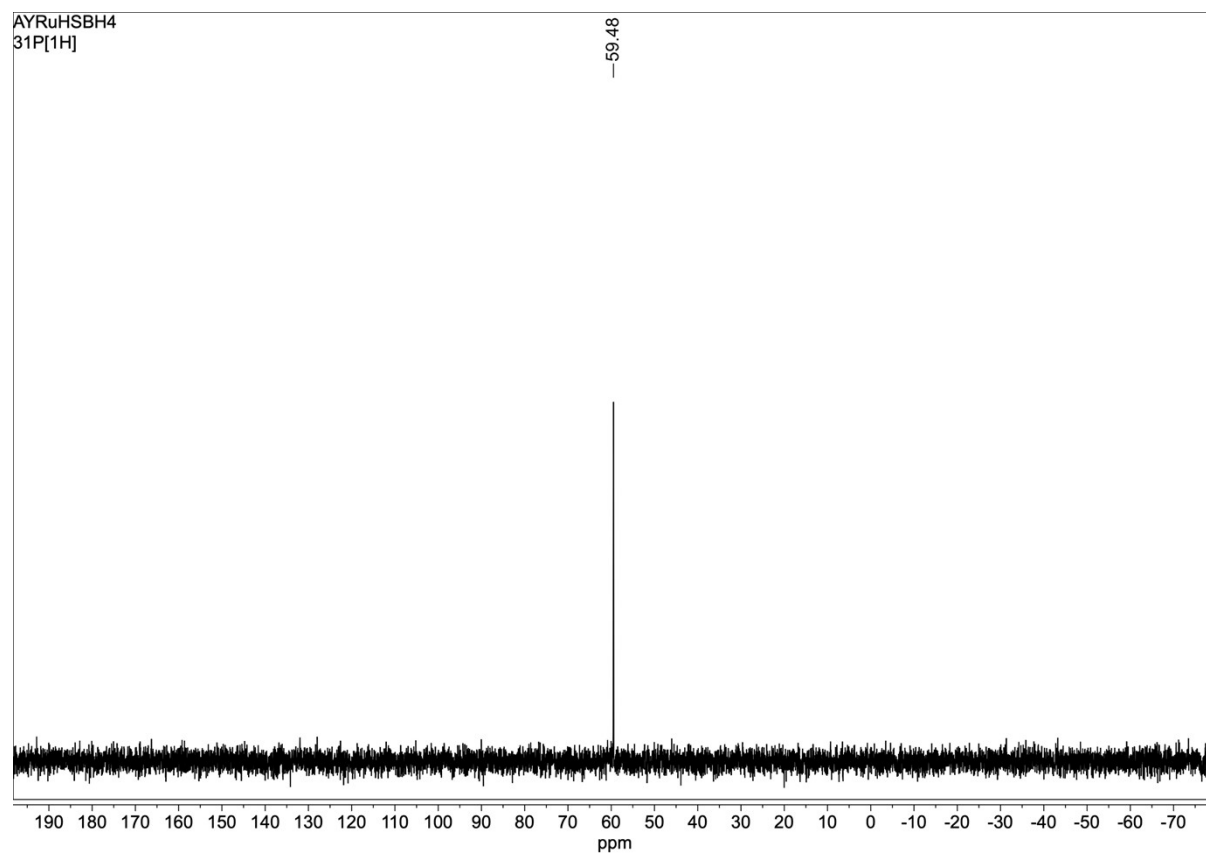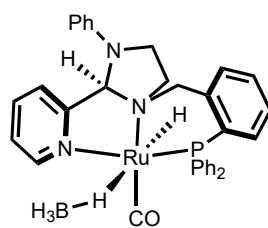

Figure S 56. ESI-MS of  $[\text{Ru}(\text{NNP})(\text{H})(\eta^1\text{-BH}_4)(\text{CO})]$

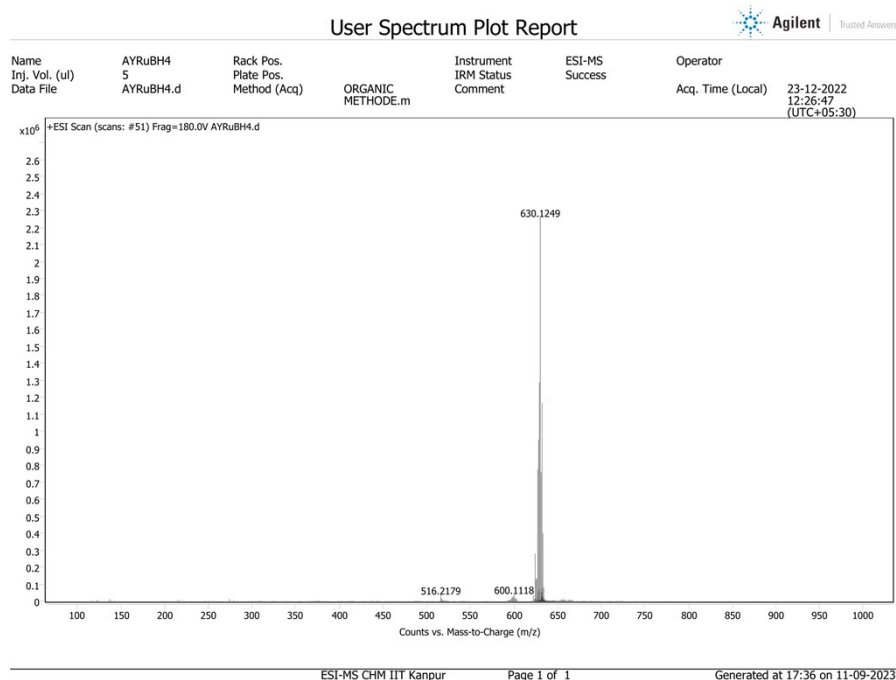

High resolution ESI-MS:  $m/z$  for  $[\text{M-BH}_4]^+ = 630.1249$  (calcd. 630.1248) =  $[\text{RuC}_{34}\text{H}_{31}\text{N}_3\text{OP}]^+$ .

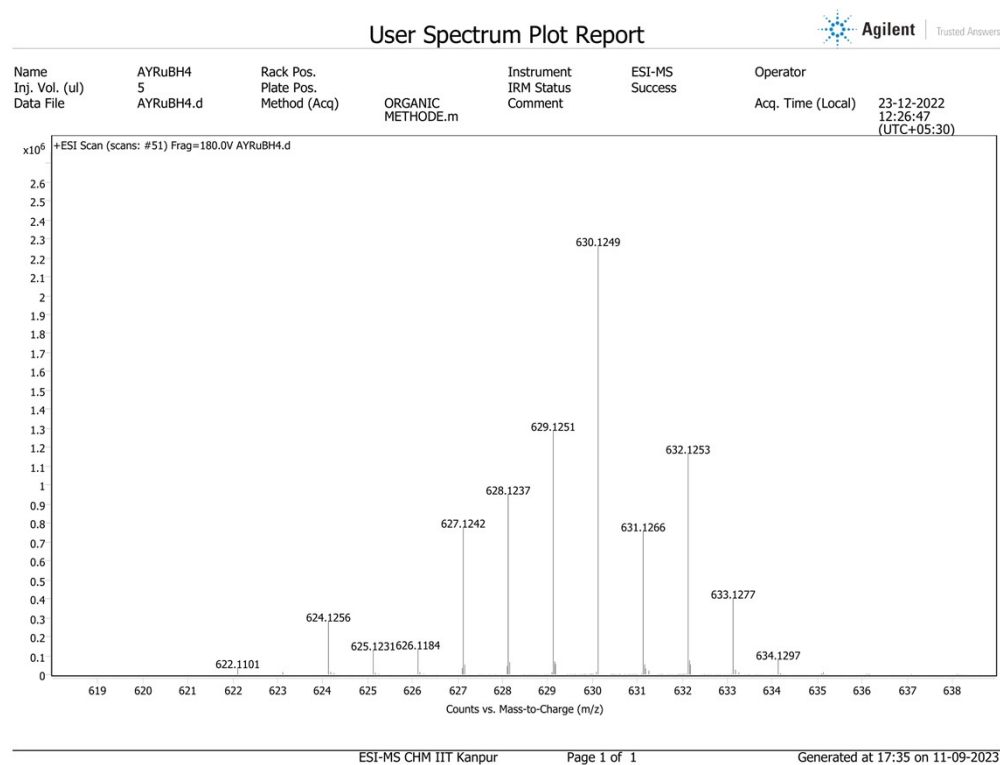

Figure S 57. Simulated ESI-MS of  $[\text{Ru}(\text{NNP})(\text{H})(\eta^1\text{-BH}_4)(\text{CO})]$

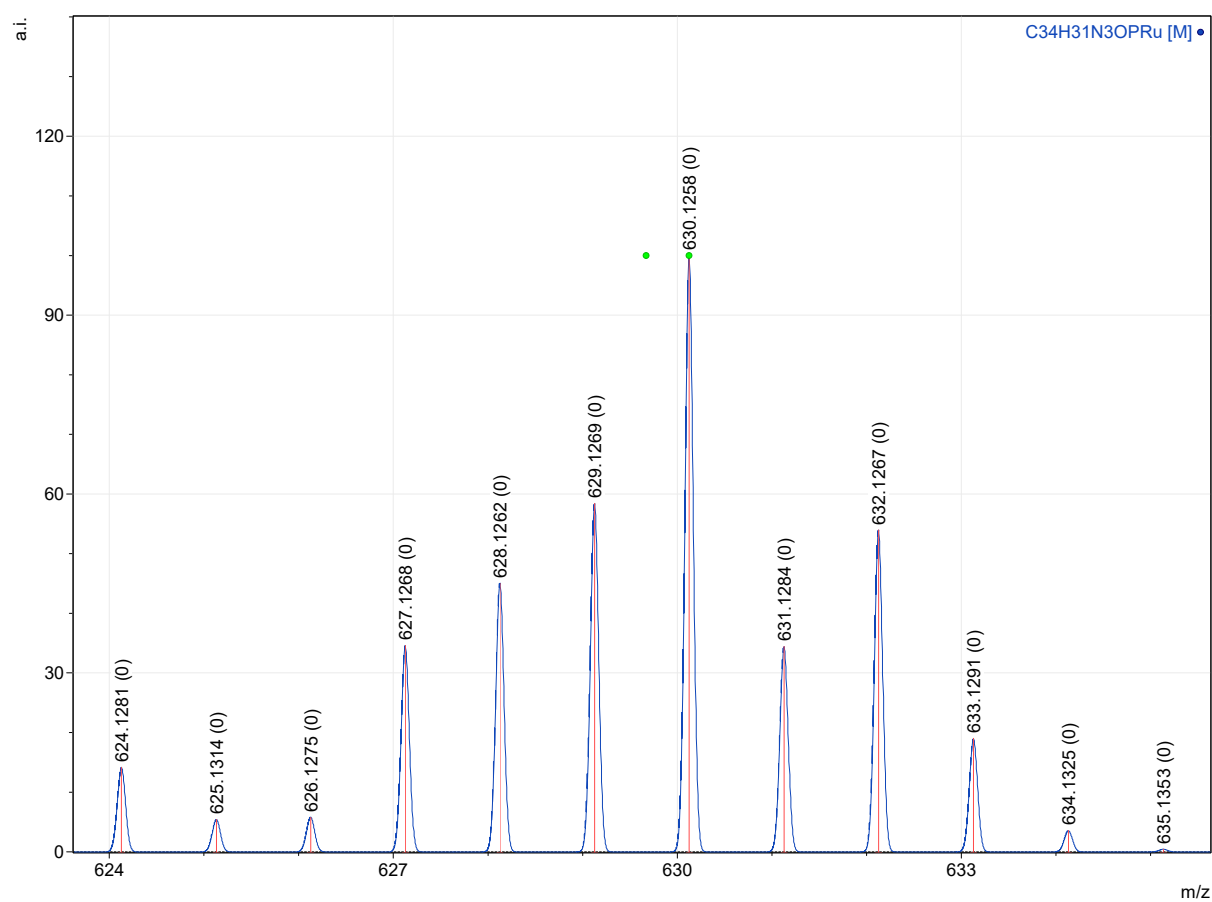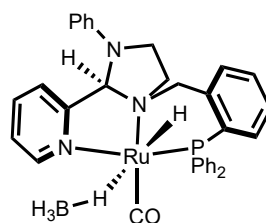



Figure S 58.  $^1\text{H}$  NMR spectrum of  $[\text{Ru}(\text{NNP})(\text{CS}_2\text{H})_2(\text{CO})]$  complex in  $\text{CDCl}_3$  at 298 K.

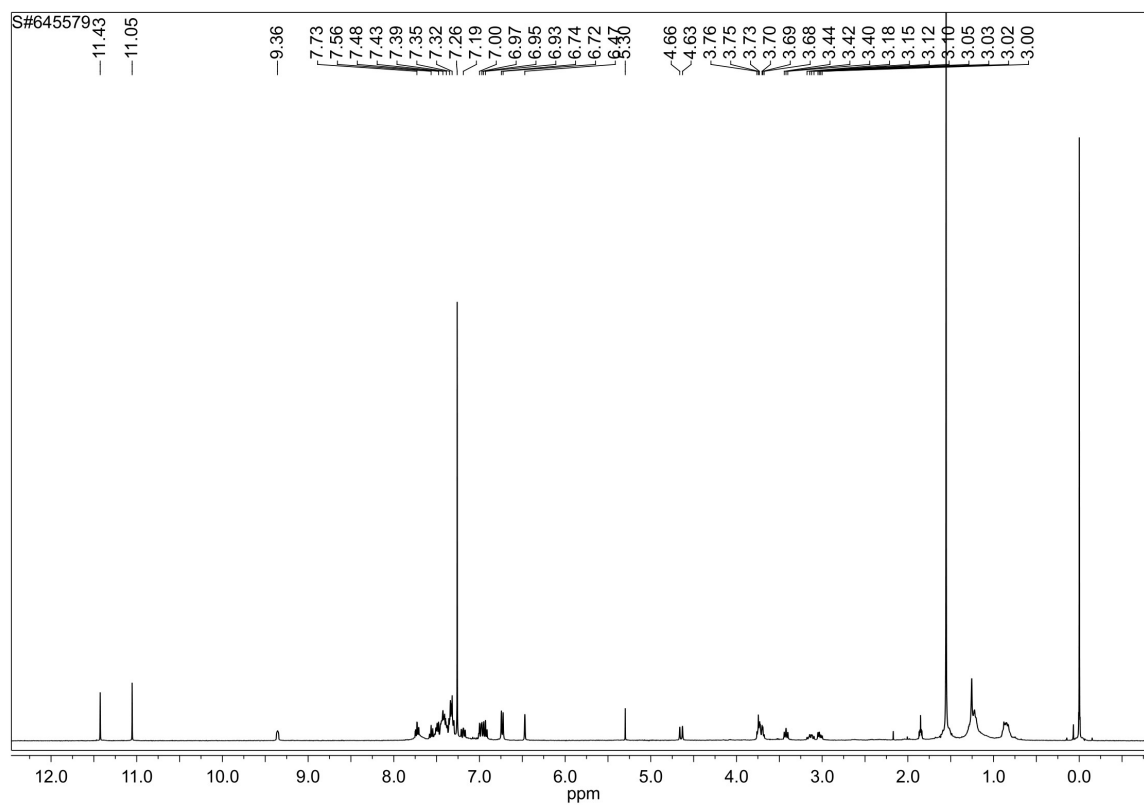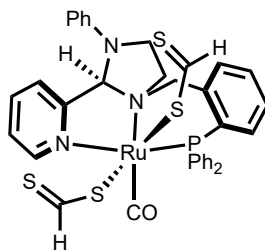

Figure S 59.  $^{31}\text{P}$  NMR spectrum of  $[\text{Ru}(\text{NNP})(\text{CS}_2\text{H})_2(\text{CO})]$  complex in  $\text{CDCl}_3$  at 298 K.

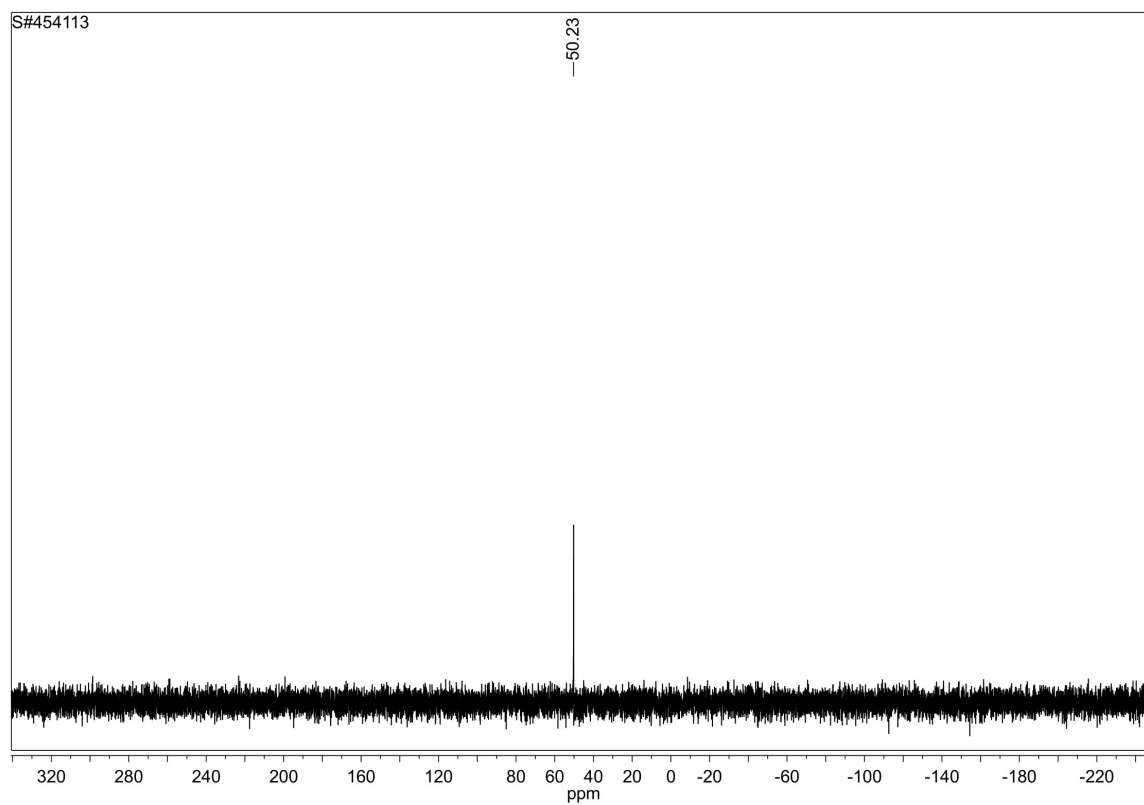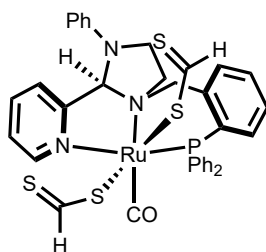

Figure S 60. ESI-MS of  $[\text{Ru}(\text{NNP})(\text{CS}_2\text{H})_2(\text{CO})]$

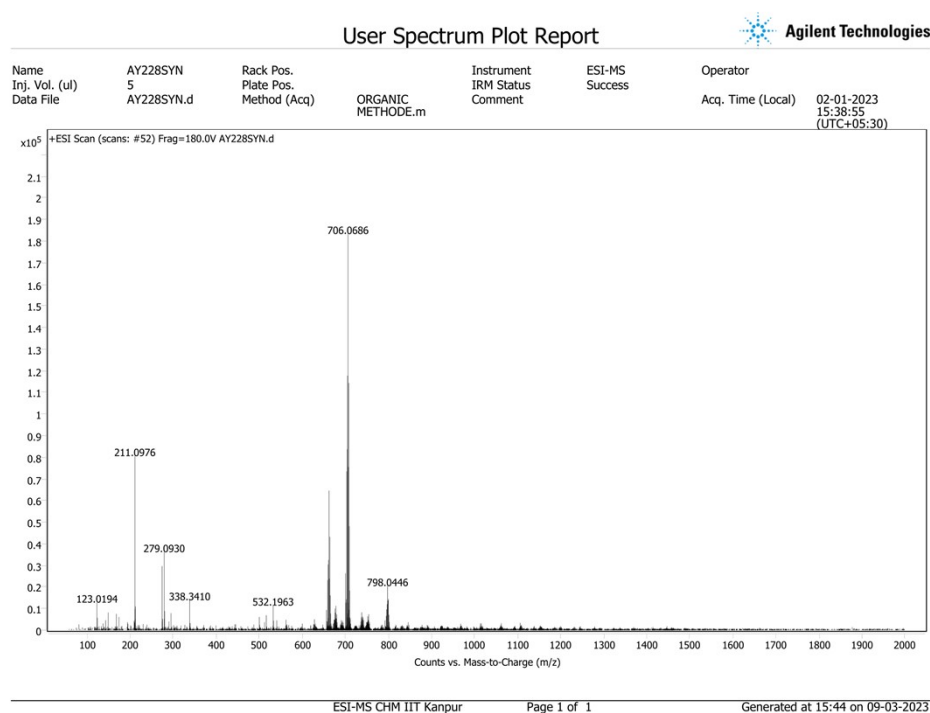

High resolution ESI-MS:  $m/z$  for  $[\text{M}-\text{CS}_2\text{H}]^+ = 706.0686$  (calcd. 706.0690) =  $[\text{RuC}_3\text{H}_3\text{N}_3\text{OPS}_2]^+$ ;  $m/z = 798.0446$  (calcd. 798.0080) =  $[\text{Ru}(\text{NNP}=\text{O})(\text{CS}_2\text{H})(\text{CS}_2)]^+$ .

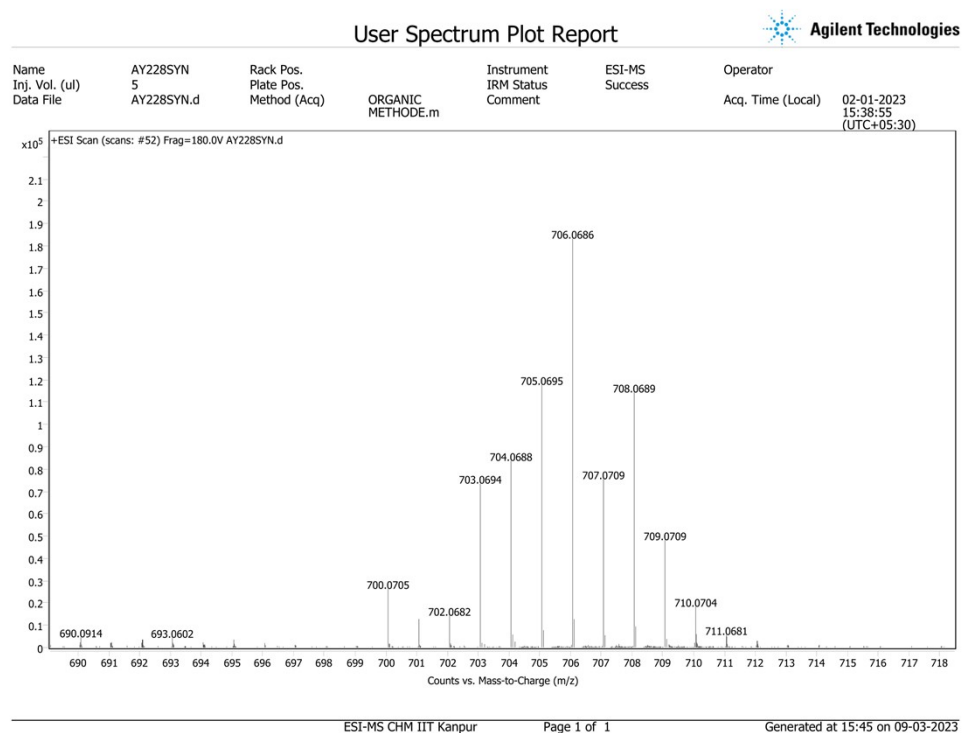

Figure S 61. Simulated for  $[\text{Ru}(\text{NNP})(\text{CS}_2\text{H})_2(\text{CO})]$

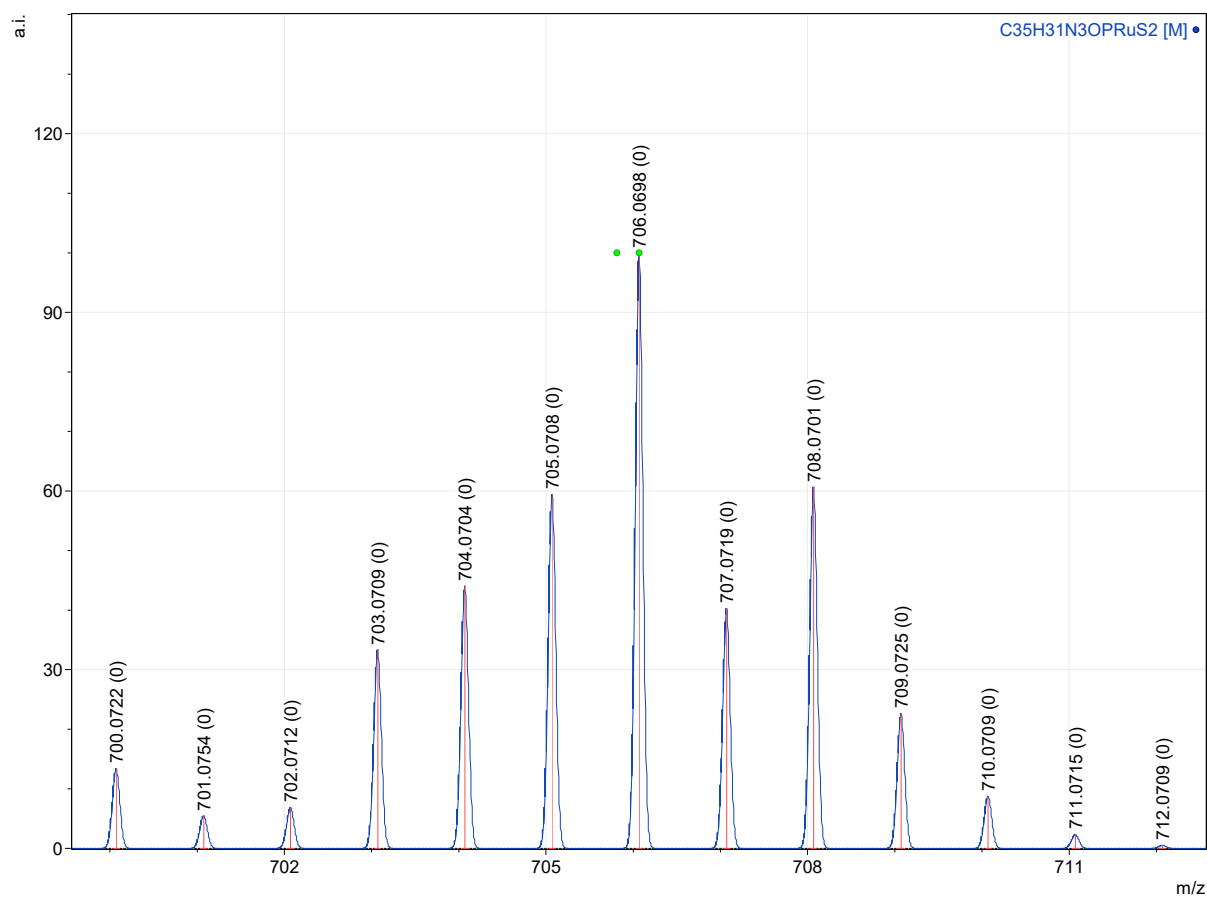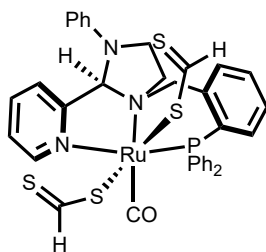

Figure S 62. FTIR spectrum of  $[\text{Ru}(\text{NNP})(\text{CS}_2\text{H})_2(\text{CO})]$

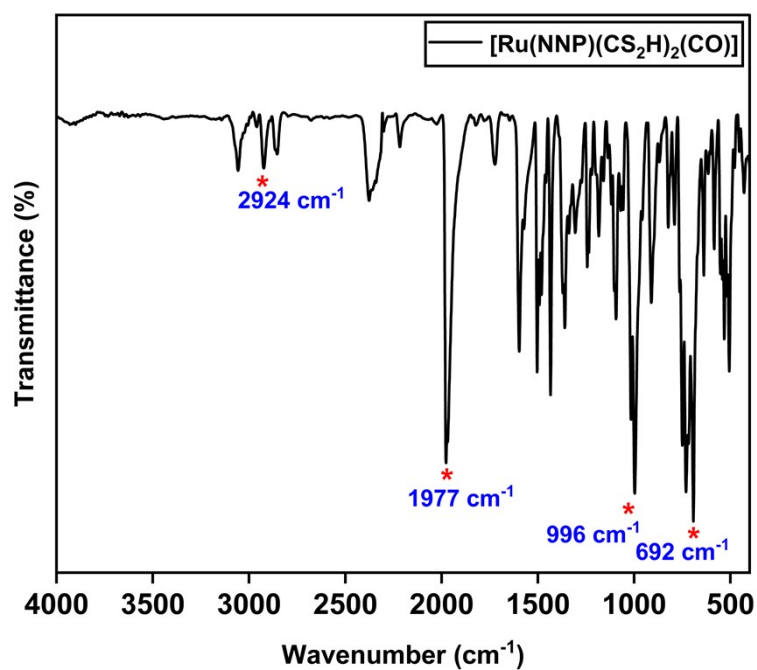

FTIR (KBr pellet)  $[\text{Ru}(\text{NNP})(\text{CS}_2\text{H})_2(\text{CO})]$ :  $\nu_{\text{C-H}} = 2930\text{--}2920\text{ cm}^{-1}$ ,  $\nu_{\text{CO}} = 1977\text{ cm}^{-1}$ ,  $\nu_{\text{S-C-S}} = 996\text{ cm}^{-1}$ ,  $\nu_{\text{C=S}} = 692\text{ cm}^{-1}$ .

Figure S 63.  $^1\text{H}$  NMR spectrum of crude  $[\text{Ru}(\text{NNP})(\text{CS}_2\text{H})_2(\text{CO})]$  and after the addition of MeI in  $\text{CDCl}_3$  at 298 K.

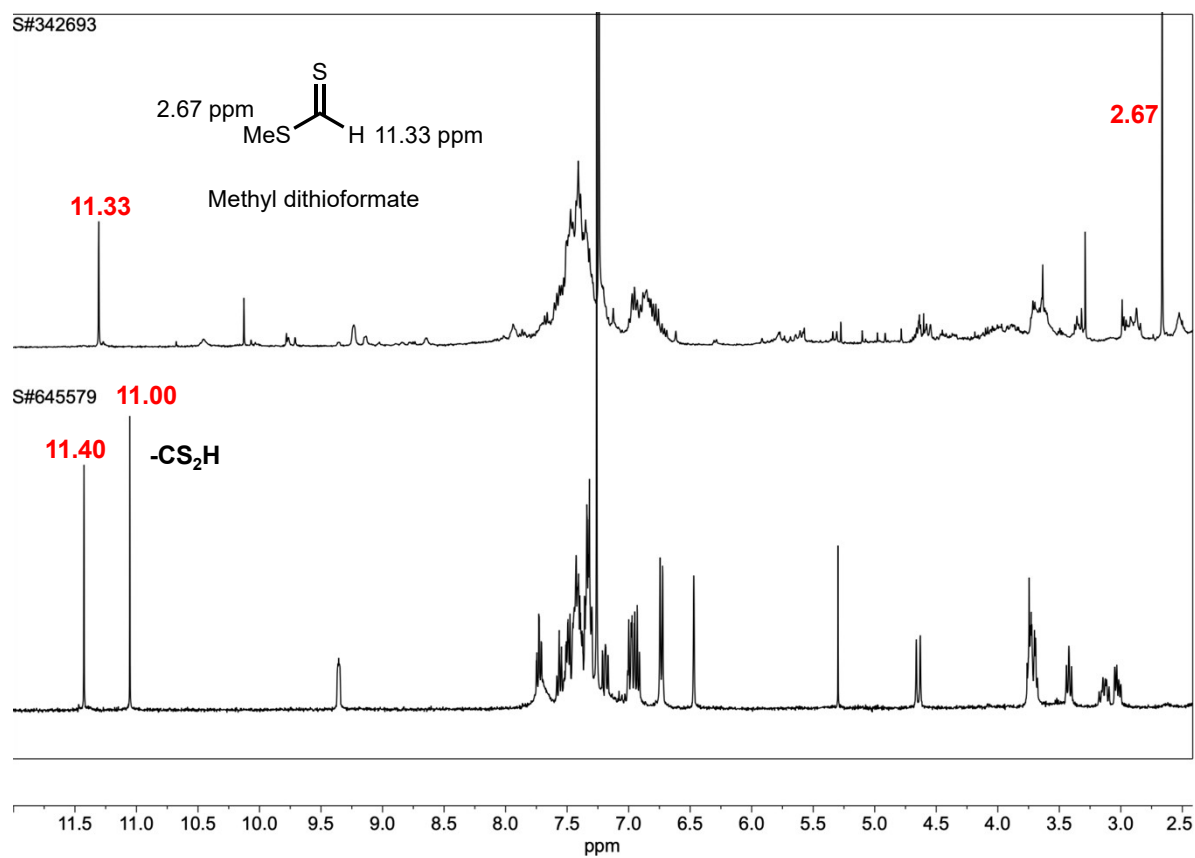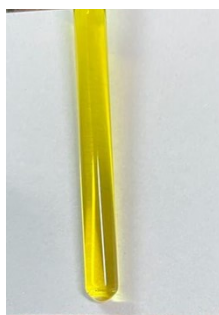

$[\text{Ru}(\text{NNP})(\text{CS}_2\text{H})_2(\text{CO})]$

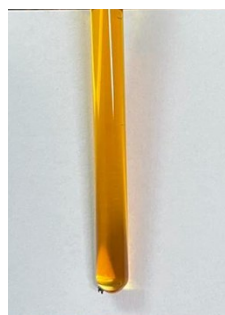

$[\text{Ru}(\text{NNP})(\text{CS}_2\text{H})_2(\text{CO})]$   
+  
MeI

$^1\text{H}$  NMR spectrum of crude  $[\text{Ru}(\text{NNP})(\text{CS}_2\text{H})_2(\text{CO})]$  (bottom) and after the addition of MeI (top).

Figure S 64.  $^{31}\text{P}$  NMR spectrum of  $[\text{Ru}(\text{NNP})\text{I}_2(\text{CO})]$  complex in dichloromethane at 298 K.

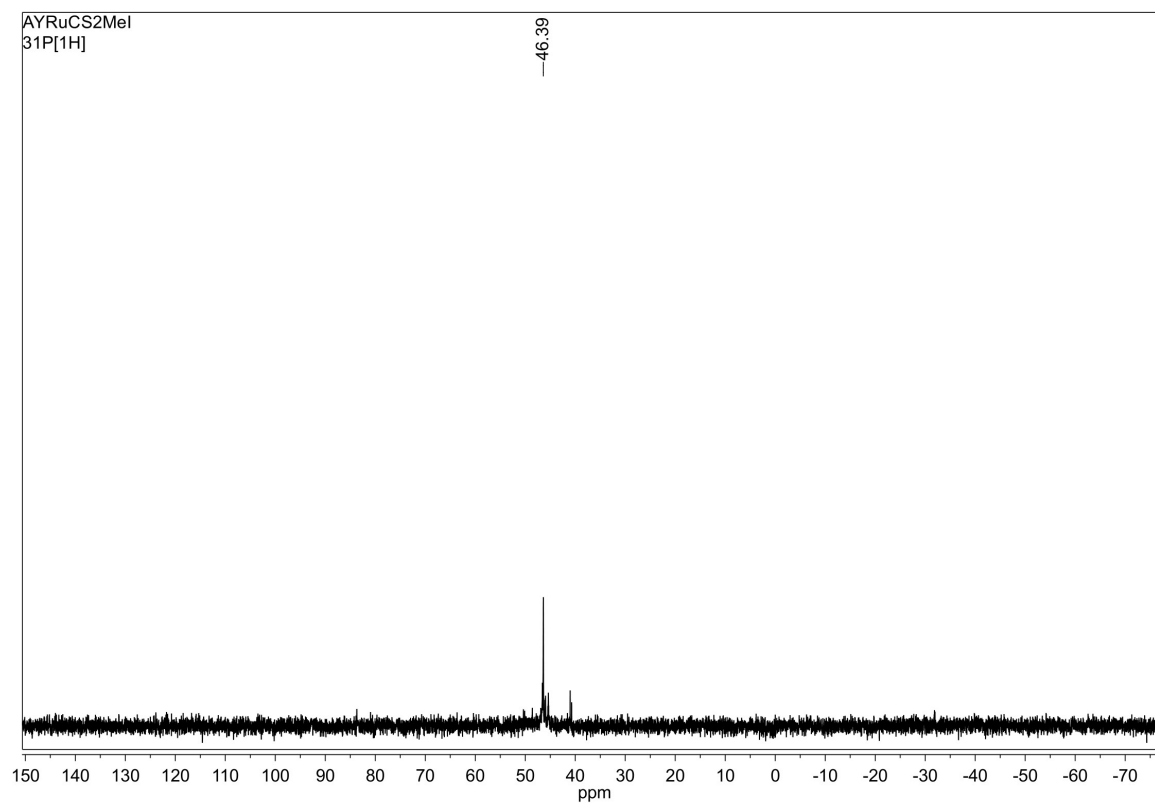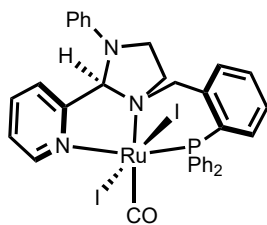

Figure S 65. ESI-MS for [Ru(NNP)I<sub>2</sub>(CO)]

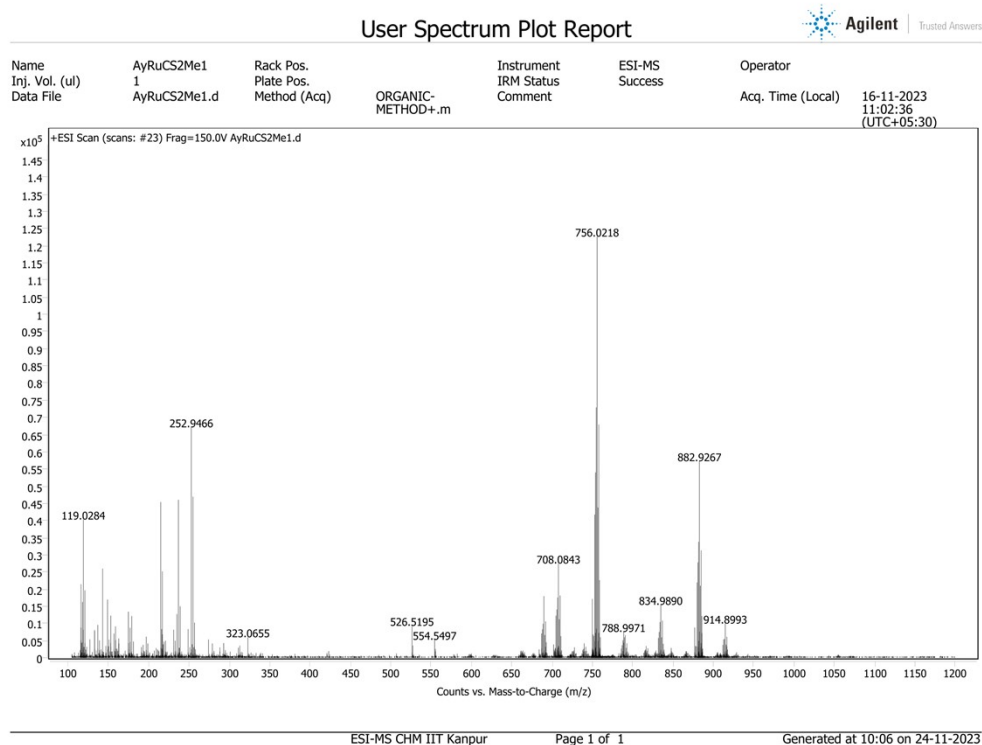

High resolution ESI-MS:  $m/z$  for  $[M-I]^+ = 756.0218$  (calcd. 756.0215) =  $[C_{34}H_{30}N_3OPRuI]^+$ .

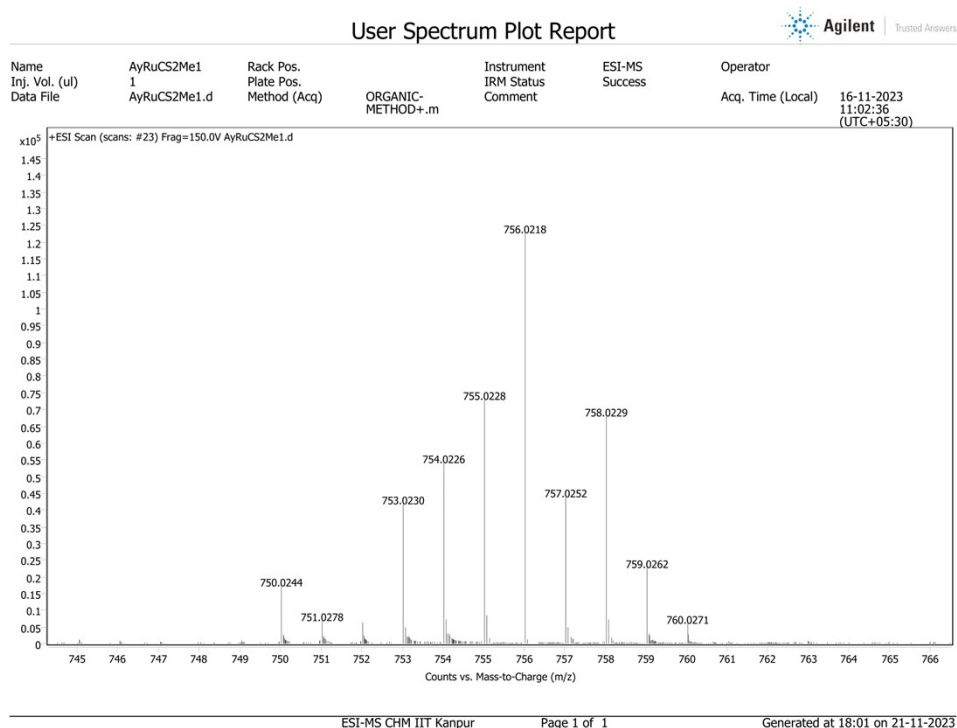



Figure S 66. Simulated ESI-MS for [Ru(NNP)I<sub>2</sub>(CO)]

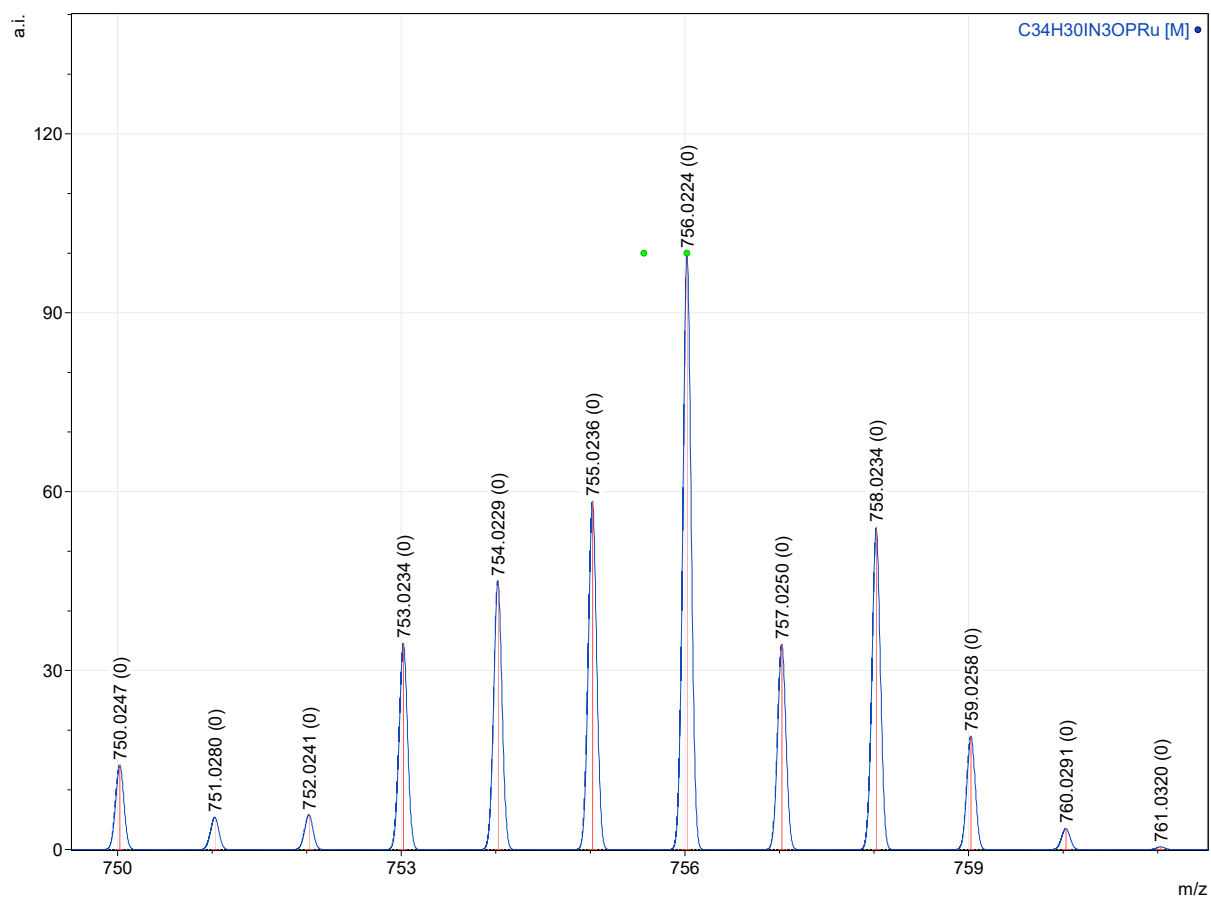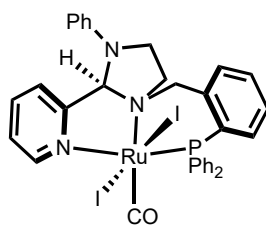

Figure S 67. UV-Vis spectrum for  $[\text{Ru}(\text{NNP})(\text{CS}_2\text{H})_2(\text{CO})]$  reaction with MeI.

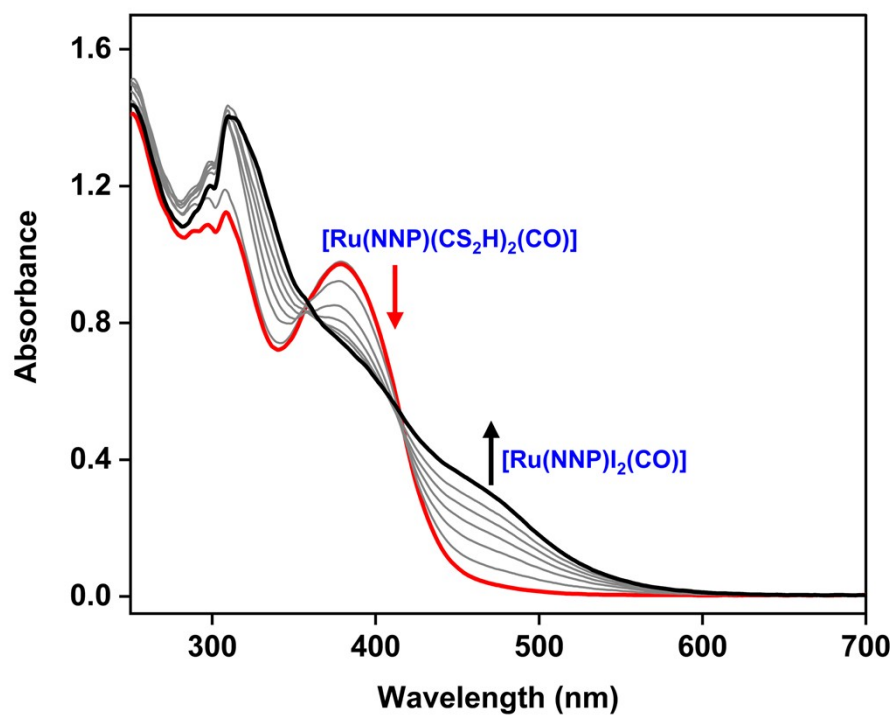

Absorption spectra of  $[\text{Ru}(\text{NNP})(\text{CS}_2\text{H})_2(\text{CO})]$  reaction with MeI in  $\text{CH}_2\text{Cl}_2$  at 0.125 mM concentration.

Figure S 68.  $^1\text{H}$  NMR spectrum of the  $[\text{Cu}(\text{NNP})\text{I}]$  in  $\text{CDCl}_3$  at 298 K.

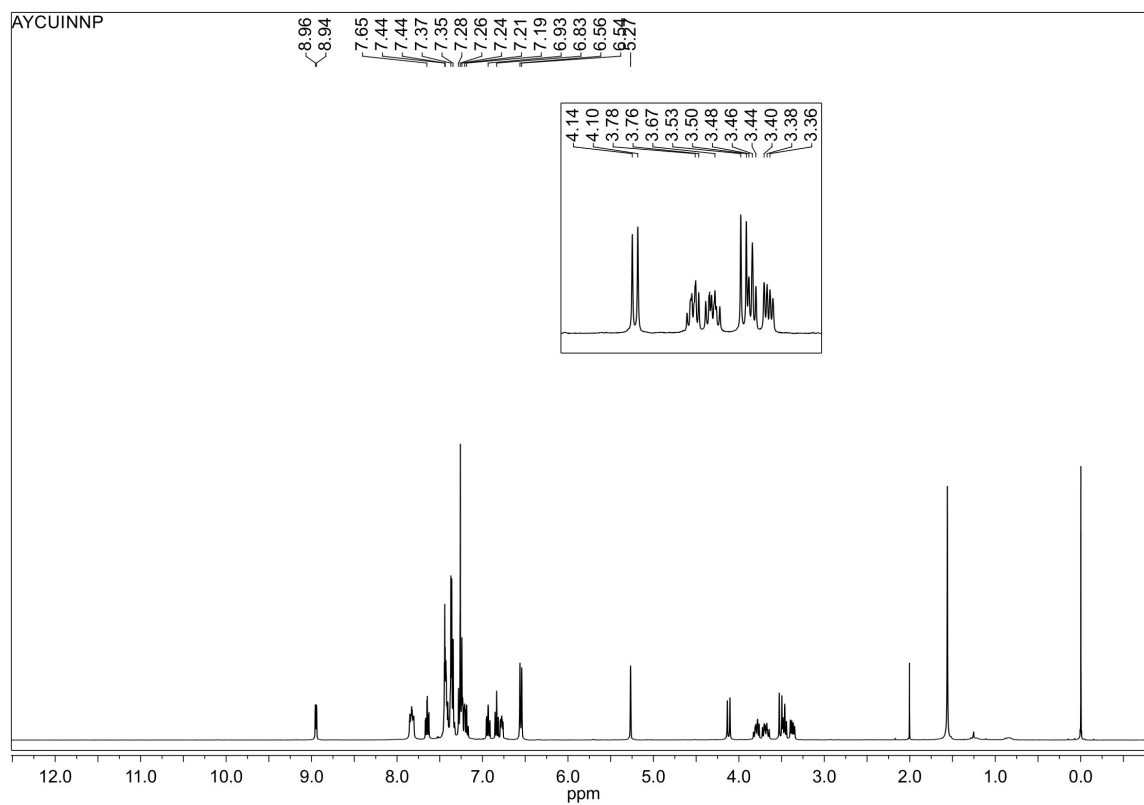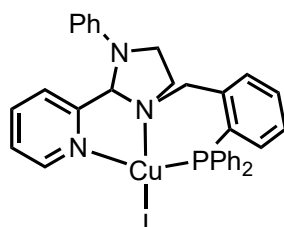

Figure S 69.  $^{31}\text{P}$  NMR spectrum of the  $[\text{Cu}(\text{NNP})\text{I}]$  in  $\text{CDCl}_3$  at 298 K.

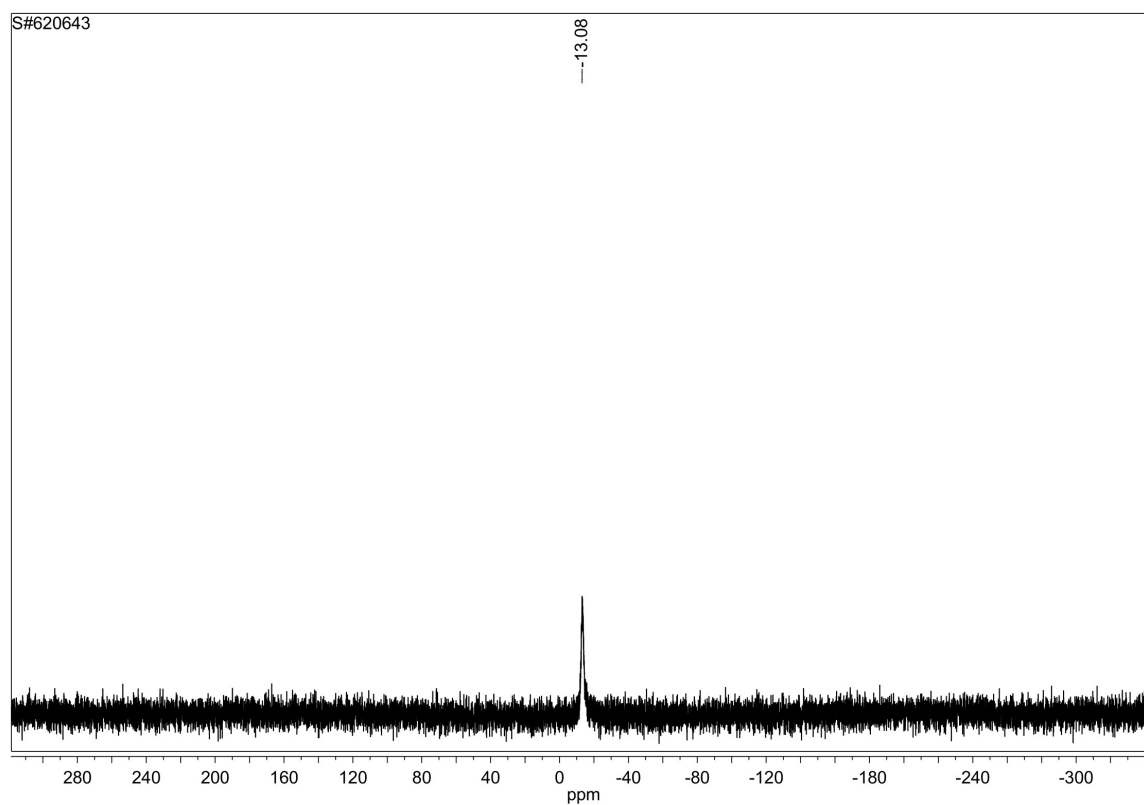

Figure S 70. ESI-MS of [Cu(NNP)I]

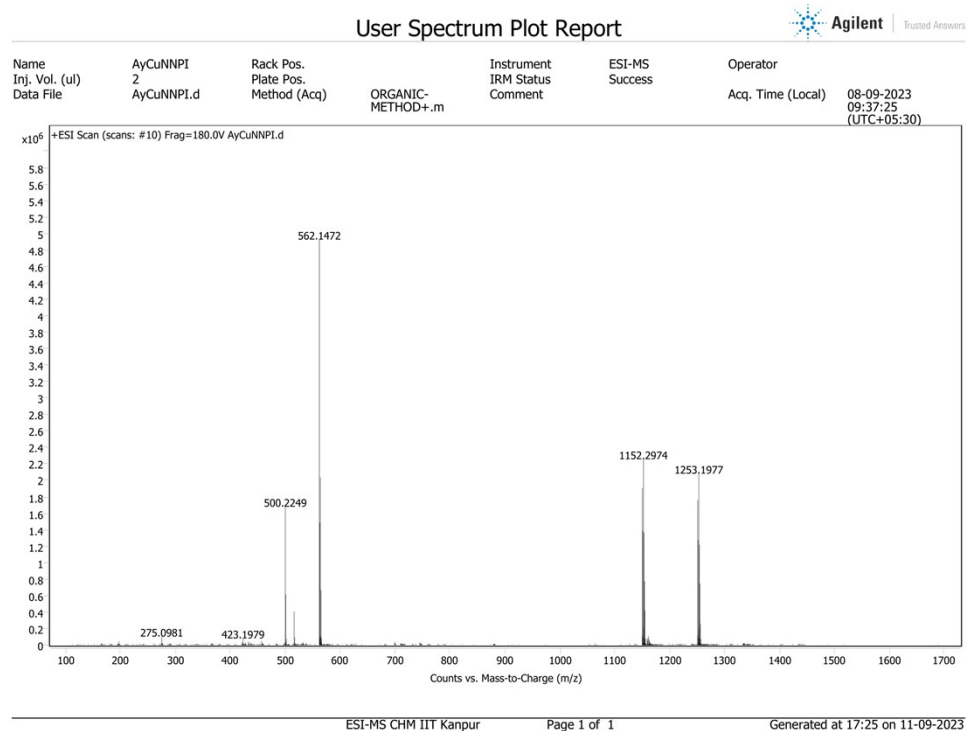

High resolution ESI-MS:  $m/z$  for  $[M-I]^+ = 562.1472$  (calcd. 562.1473) =  $[CuC_{33}H_{30}N_3P]^+$ ;  $m/z = 1253.1977$  (calcd. 1253.1973) =  $Cu_2(NNP)_2I^+$ ;  $m/z = 500.2249$  (calcd. 500.2256) =  $[NNP+H]^+$ .

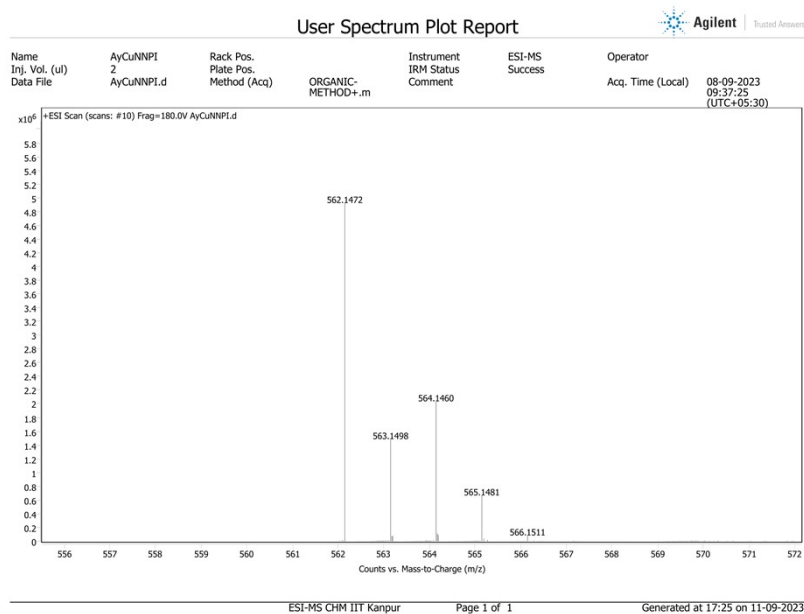

Figure S 71. Simulated ESI-MS of [Cu(NNP)I]

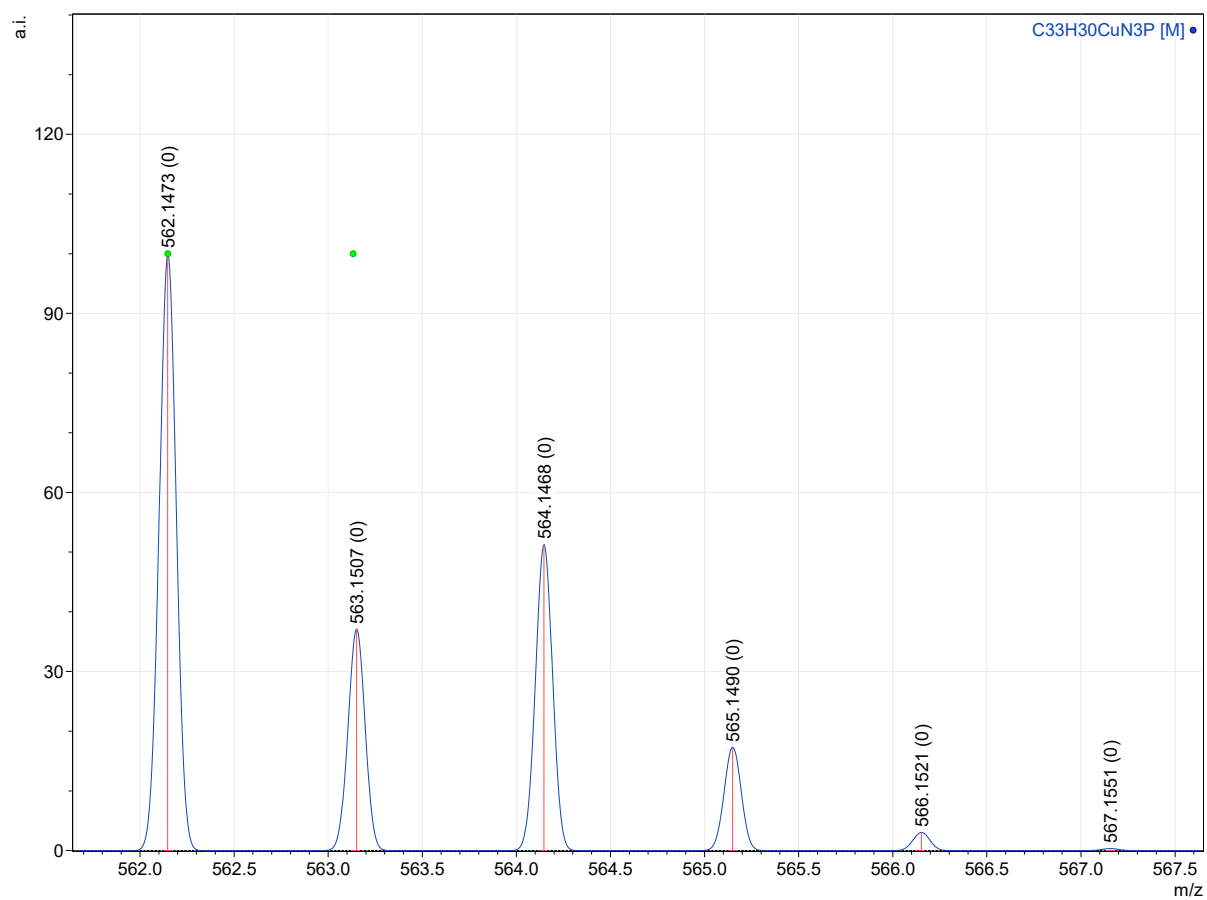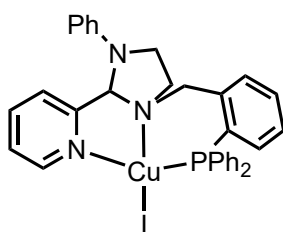

Figure S 72.  $^1\text{H}$  NMR spectrum of the  $[\text{Cu}(\text{NNP})\text{Cl}]$  in  $\text{CDCl}_3$  at 298 K.

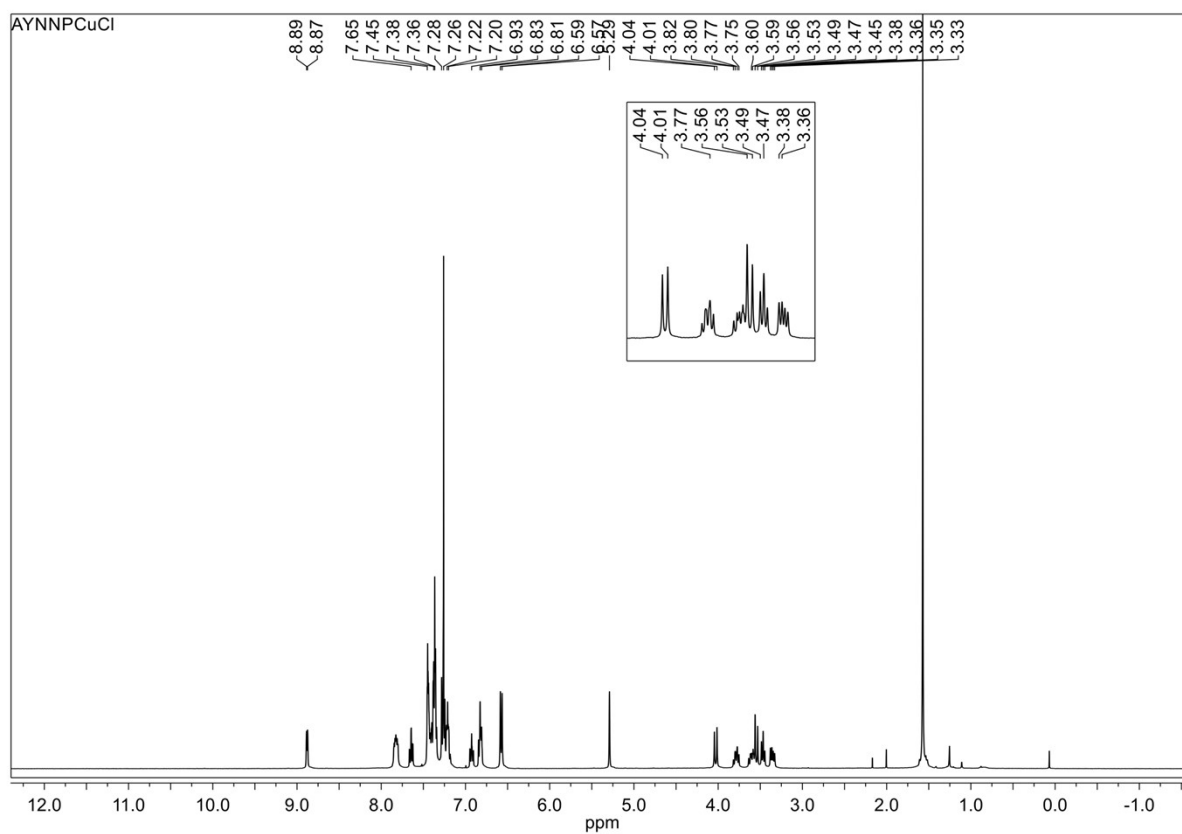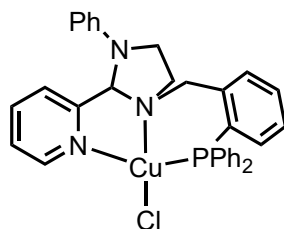

Figure S 73.  $^{31}\text{P}$  NMR spectrum of the  $[\text{Cu}(\text{NNP})\text{Cl}]$  in  $\text{CDCl}_3$  at 298 K.

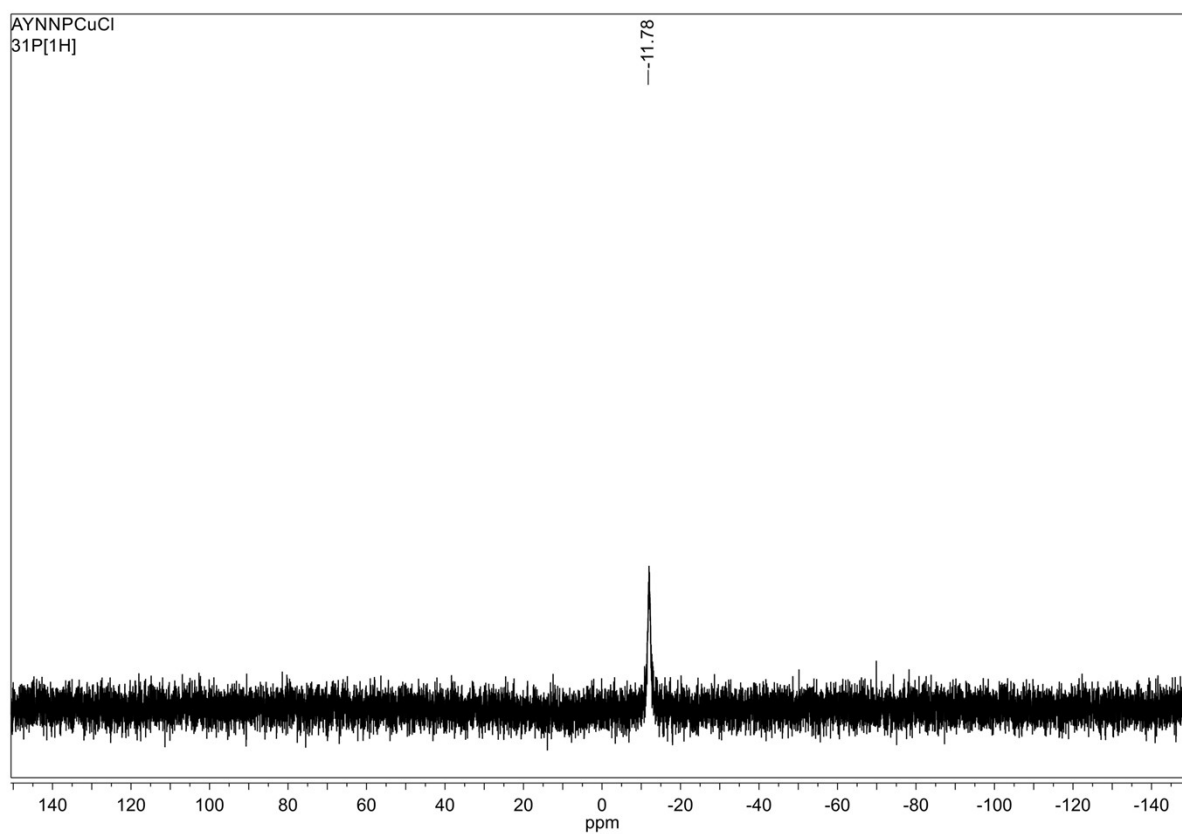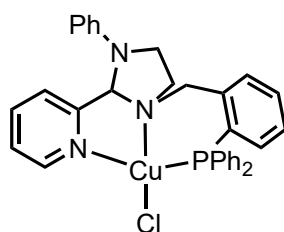



Figure S 74.  $^1\text{H}$  NMR spectrum of the  $[\text{Cu}(\text{NNP})(\text{CH}_3\text{CN})][\text{BF}_4]$  in  $\text{CDCl}_3$  at 298 K.

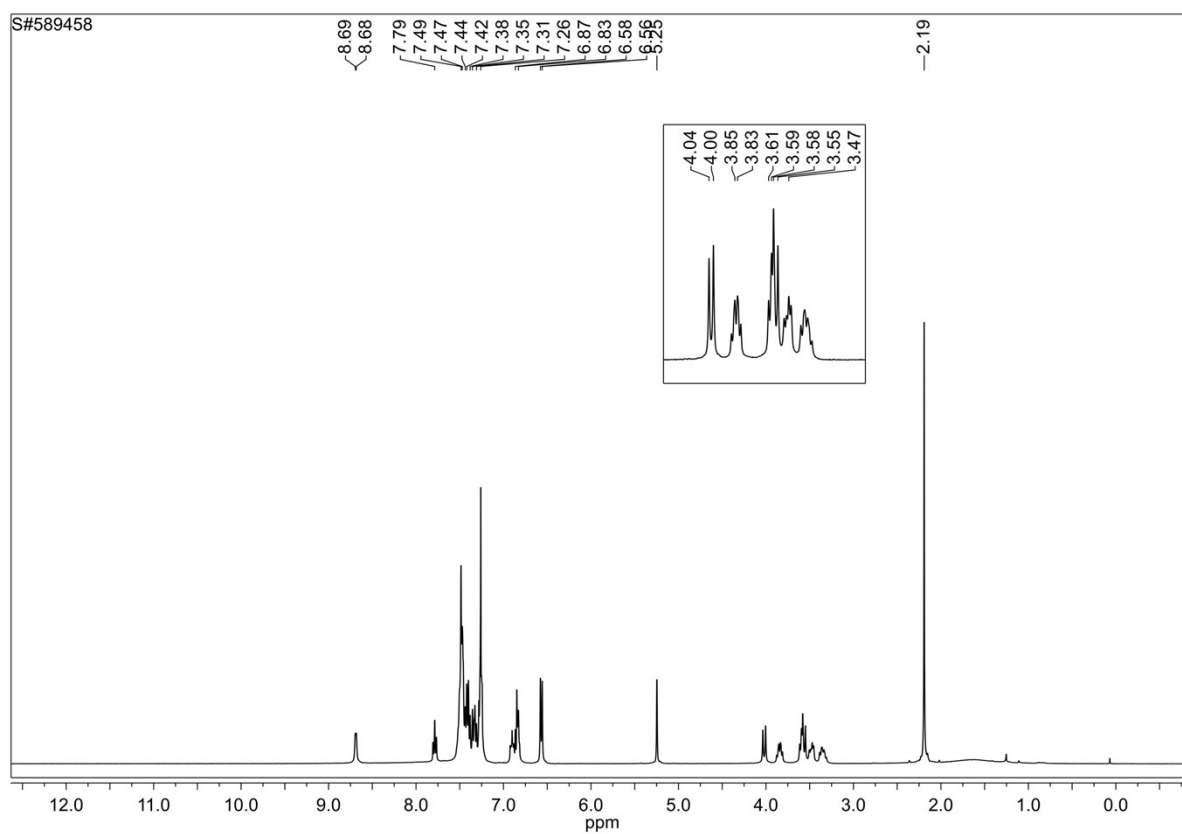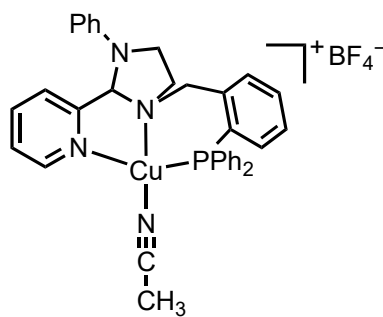

Figure S 75.  $^{31}\text{P}$  NMR spectrum of the  $[\text{Cu}(\text{NNP})(\text{CH}_3\text{CN})][\text{BF}_4]$  in  $\text{CDCl}_3$  at 298 K.

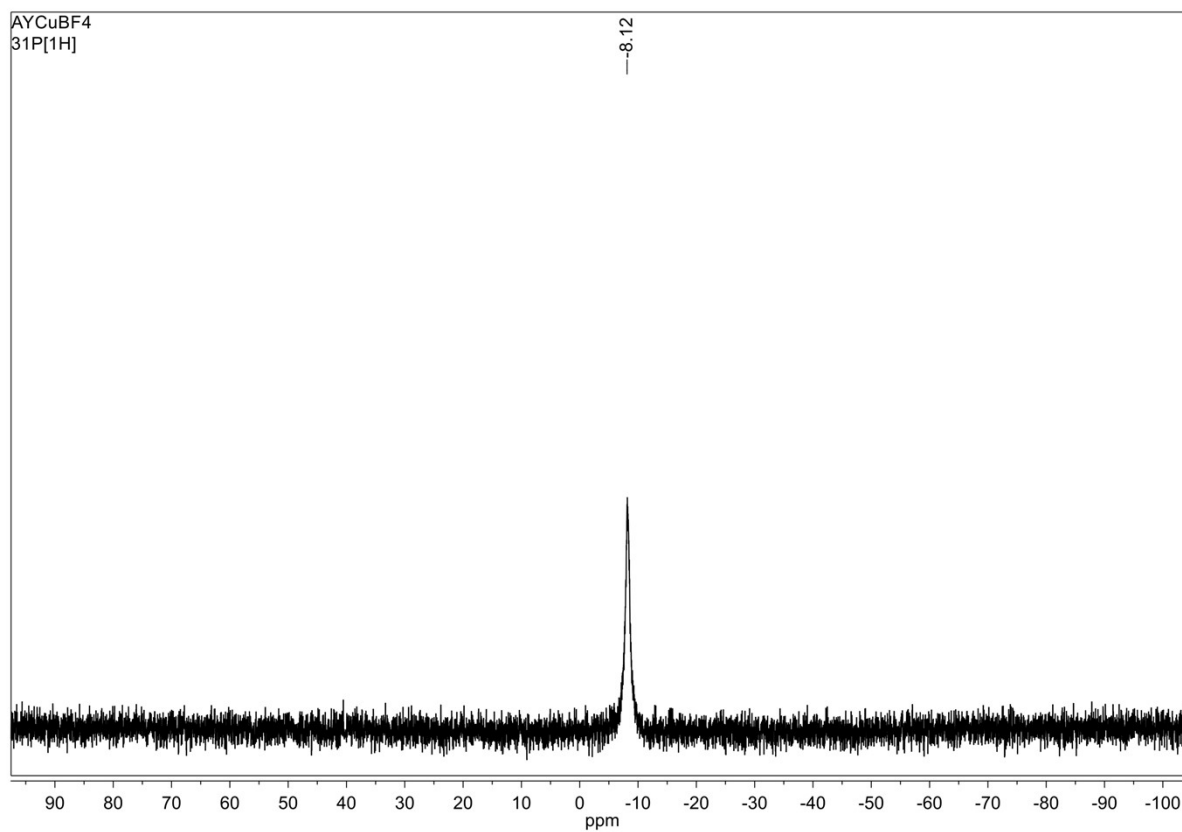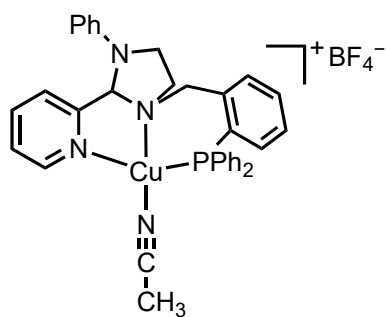

Figure S 76.  $^1\text{H}$  NMR spectrum of the  $[\text{Cu}(\text{NNP})(\text{CH}_3\text{CN})][\text{PF}_6]$  in  $\text{CDCl}_3$  at 298 K.

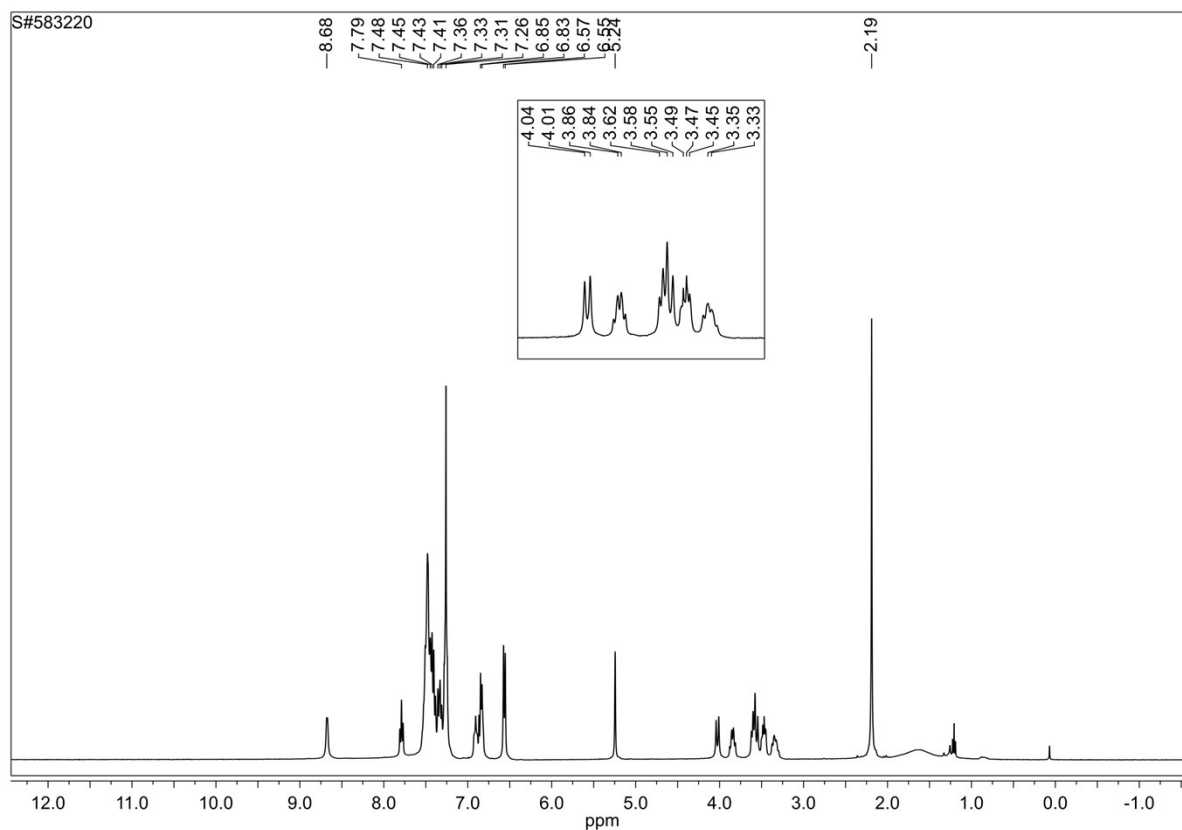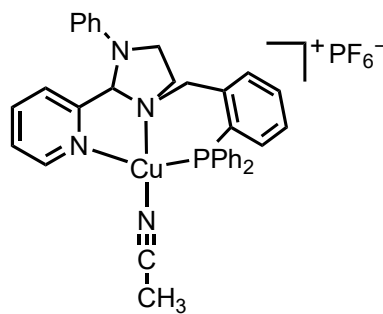

Figure S 77.  $^{31}\text{P}$  NMR spectrum of the  $[\text{Cu}(\text{NNP})(\text{CH}_3\text{CN})][\text{PF}_6]$  in  $\text{CDCl}_3$  at 298 K.

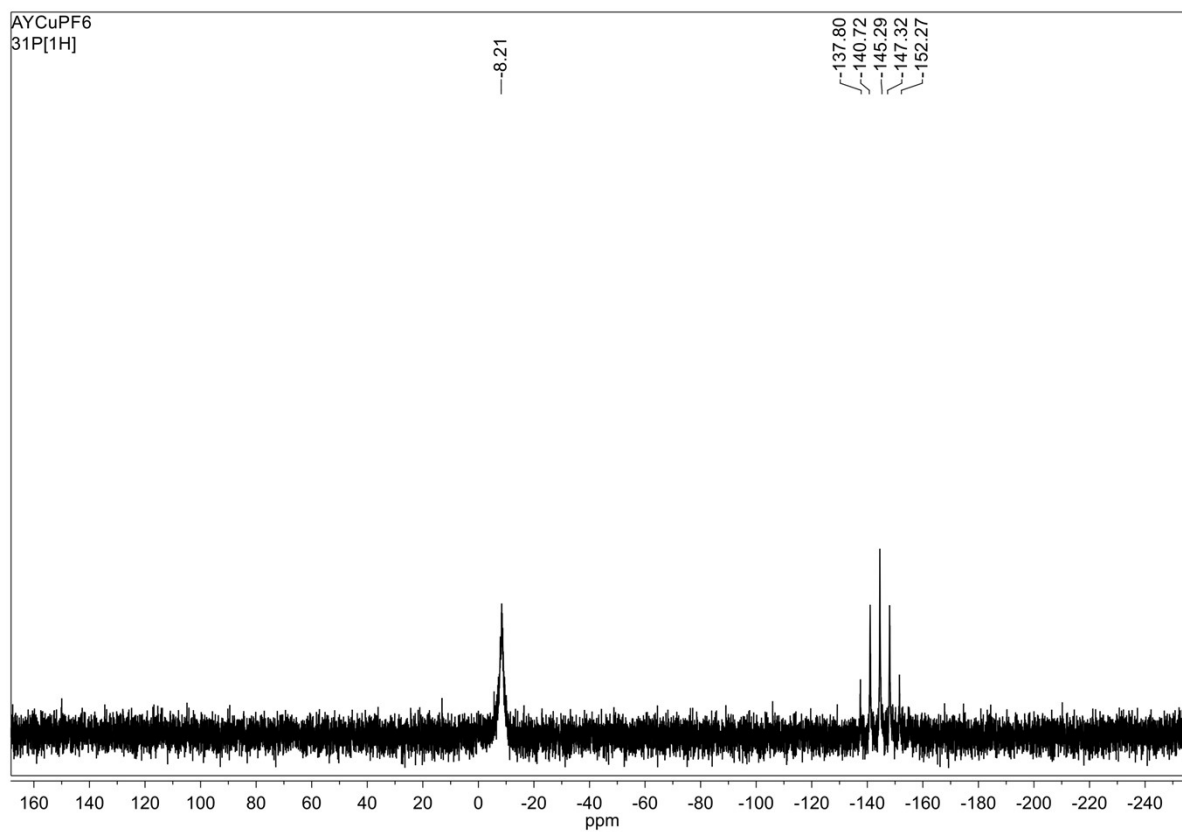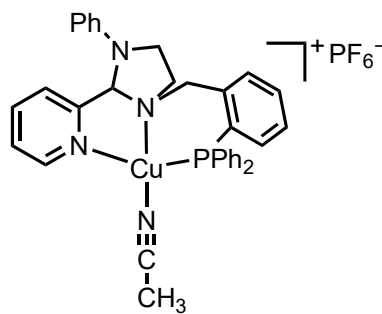

Figure S 78.  $^1\text{H}$  NMR spectrum of the  $[\text{Cu}(\text{NNP})(\text{CH}_3\text{CN})][\text{OTf}]$  in  $\text{CDCl}_3$  at 298 K.

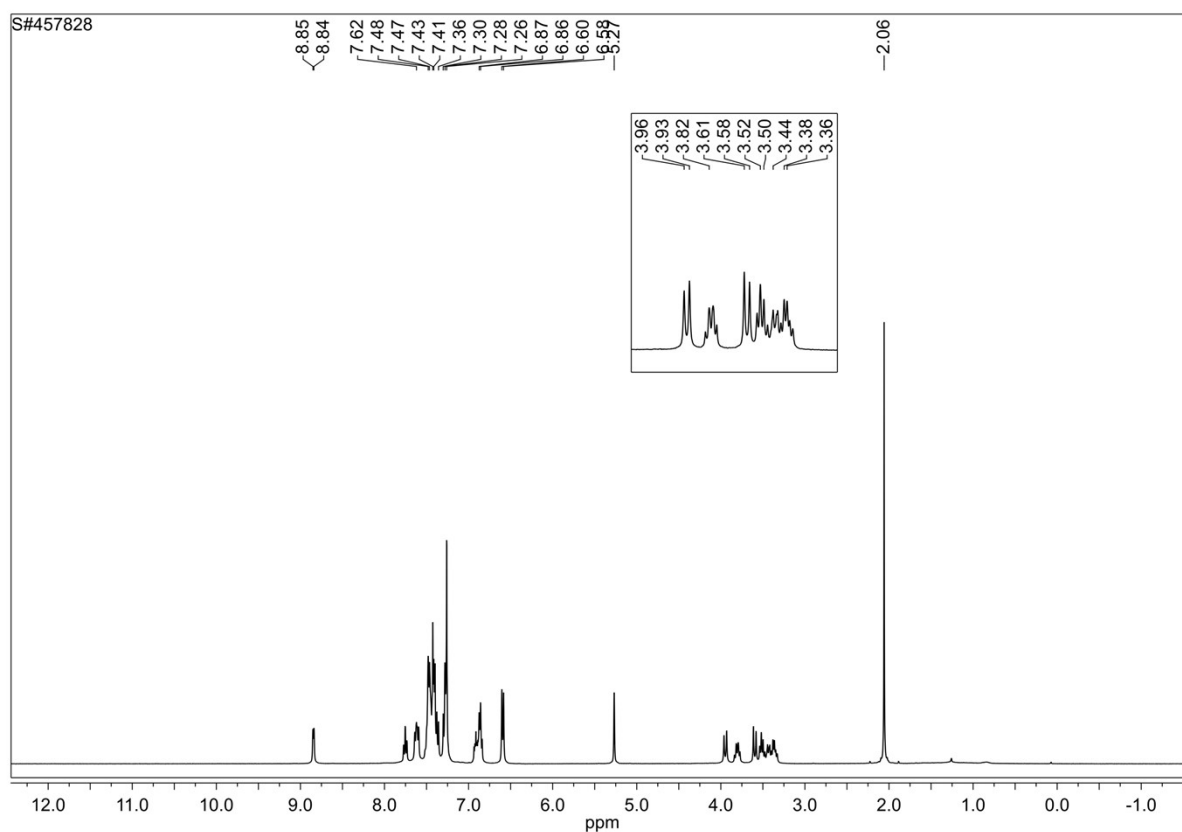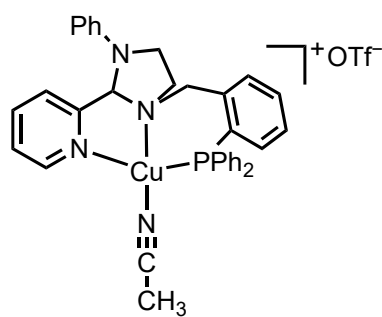

Figure S 79.  $^{31}\text{P}$  NMR spectrum of the  $[\text{Cu}(\text{NNP})(\text{CH}_3\text{CN})](\text{OTf})$  in  $\text{CDCl}_3$  at 298 K.

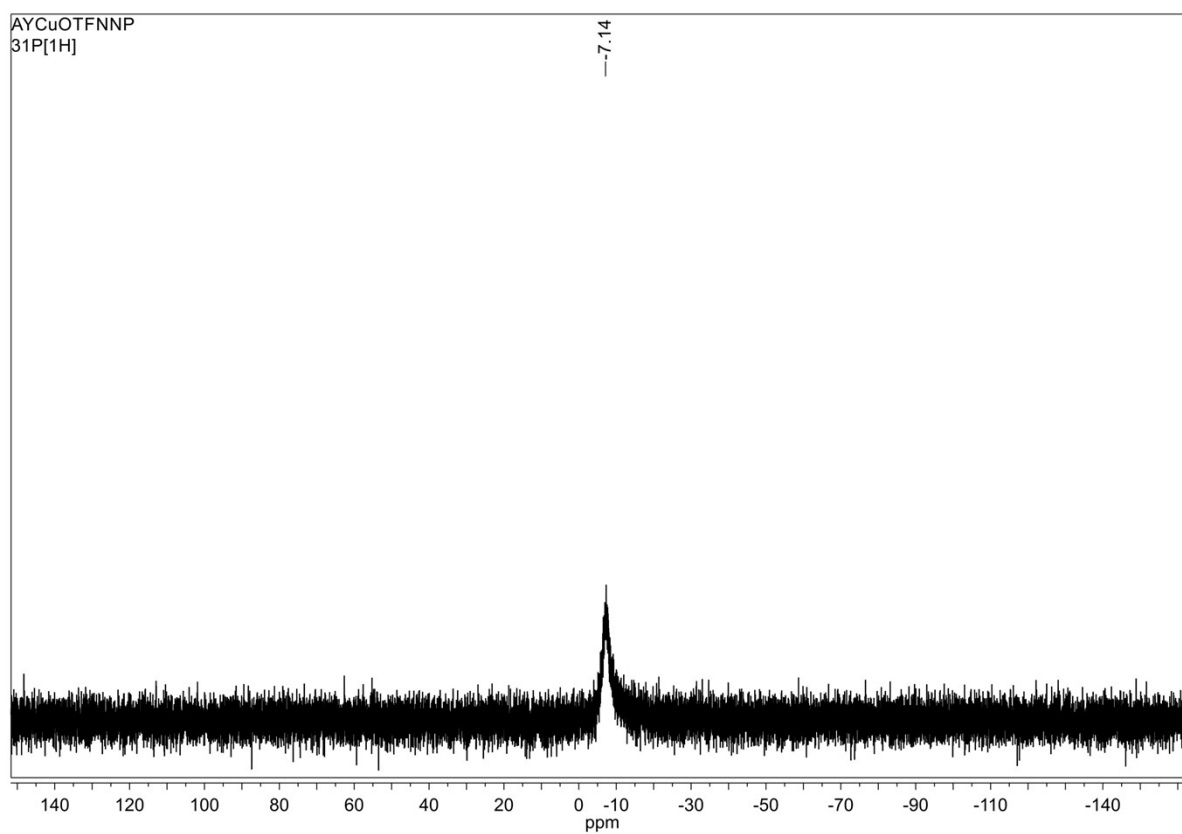

Figure S 80.  $^1\text{H}$  NMR spectrum of the  $[\text{Cu}(\text{NNP})(\text{PPh}_3)][\text{BF}_4]$  in  $\text{CDCl}_3$  at 298 K.

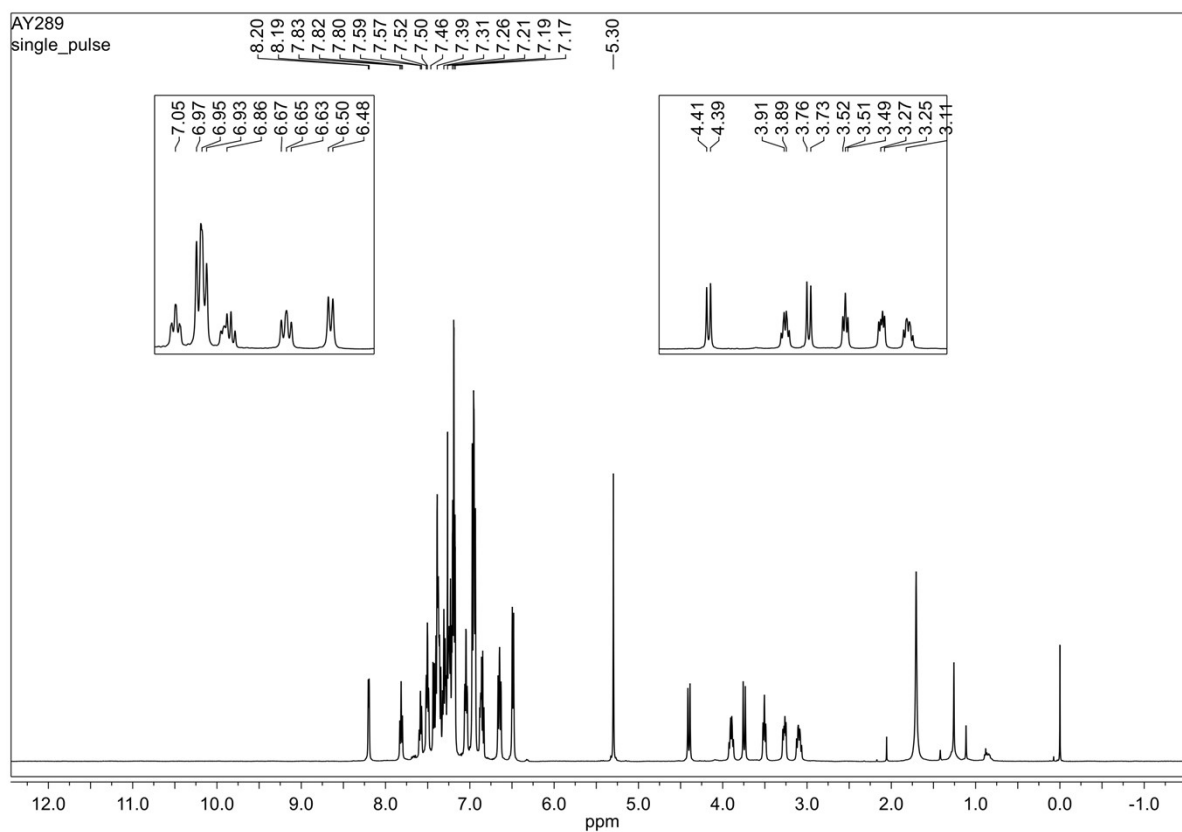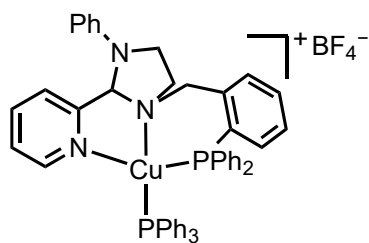

Figure S 81.  $^{31}\text{P}$  NMR spectrum of the  $[\text{Cu}(\text{NNP})(\text{PPh}_3)][\text{BF}_4]$  in  $\text{CDCl}_3$  at 298 K.

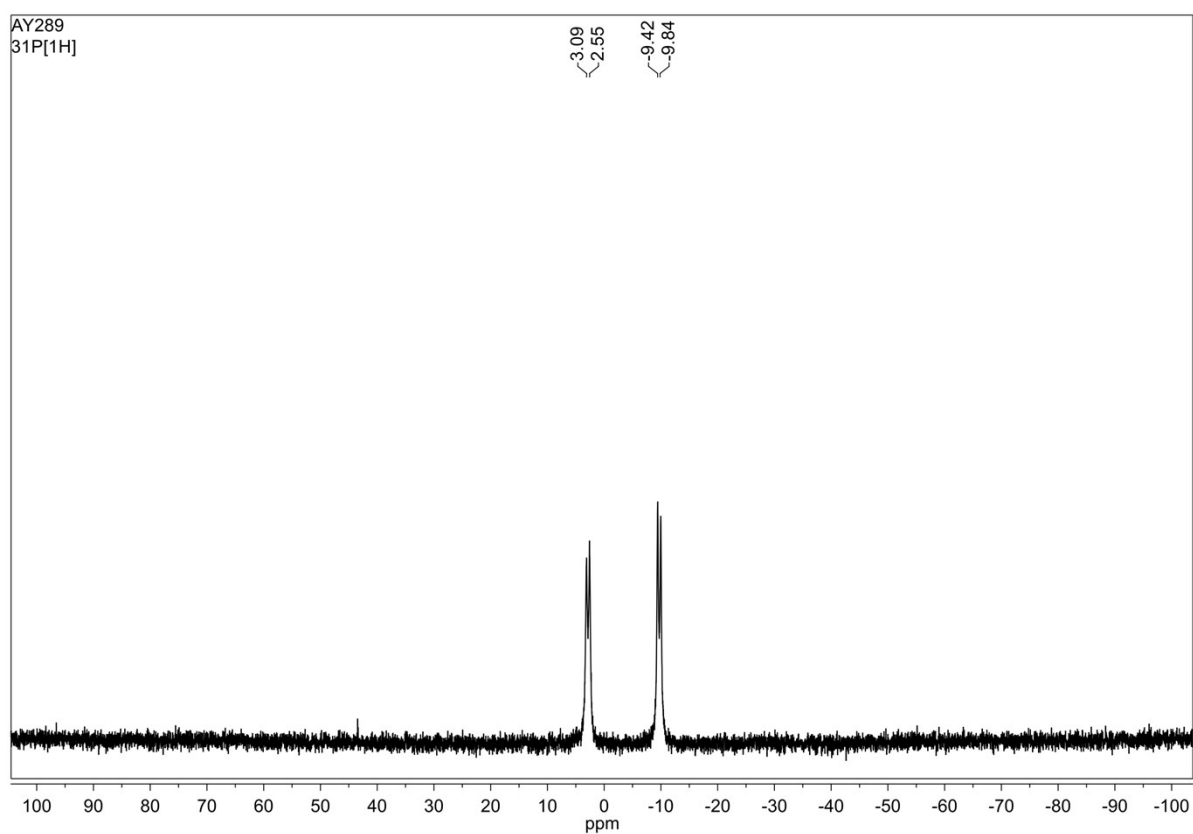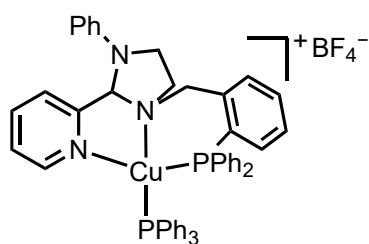



Figure S 82. ESI-MS of  $[\text{Cu}_2(\text{NNP})_2(\mu\text{-Cl})\text{Cl}_2][\text{CuCl}_2]$

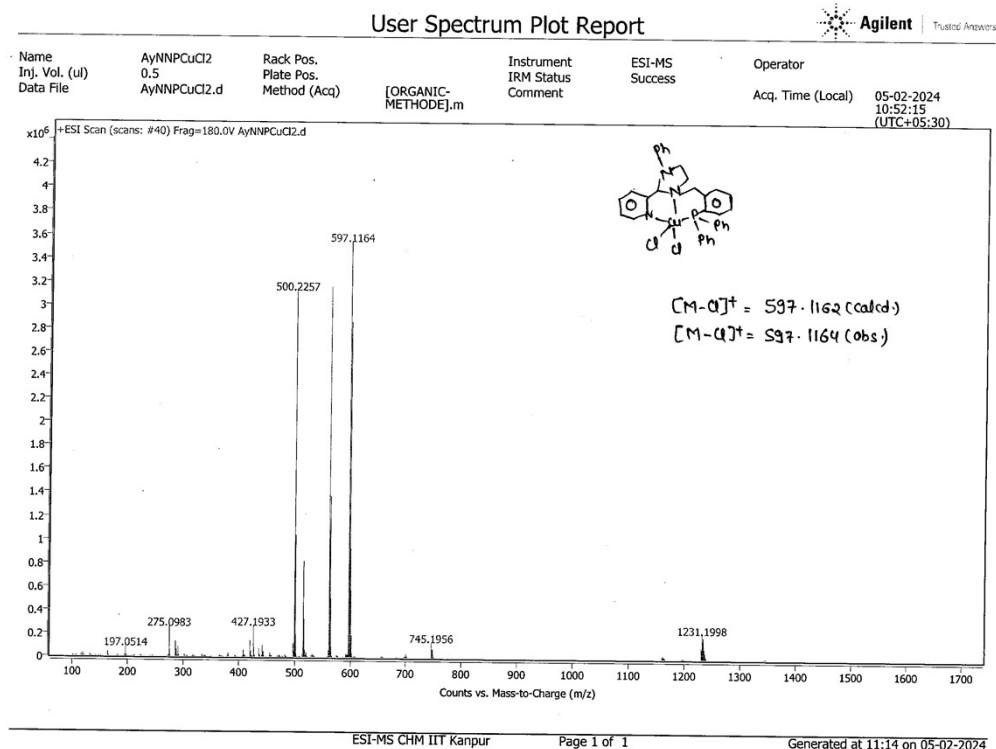

High resolution ESI-MS:  $m/z$  for  $[\text{M}-\text{Cl}]^+ = 597.1164$  (calcd. 597.1162) =  $[\text{CuC}_{33}\text{H}_{30}\text{N}_3\text{PCl}]^+$ ;  $[\text{M}-2\text{Cl}]^+ = 562.1472$  (calcd. 562.1473) =  $[\text{CuC}_{33}\text{H}_{30}\text{N}_3\text{P}]^+$ ;  $m/z = 500.2257$  (calcd. 500.2256) =  $[\text{NNP}+\text{H}]^+$ ;  $m/z = 1231.1998$  (calcd. 1231.1983 (96.0%)) =  $[\text{Cu}_2(\text{NNP})_2(\mu\text{-Cl})\text{Cl}_2]^+$ .

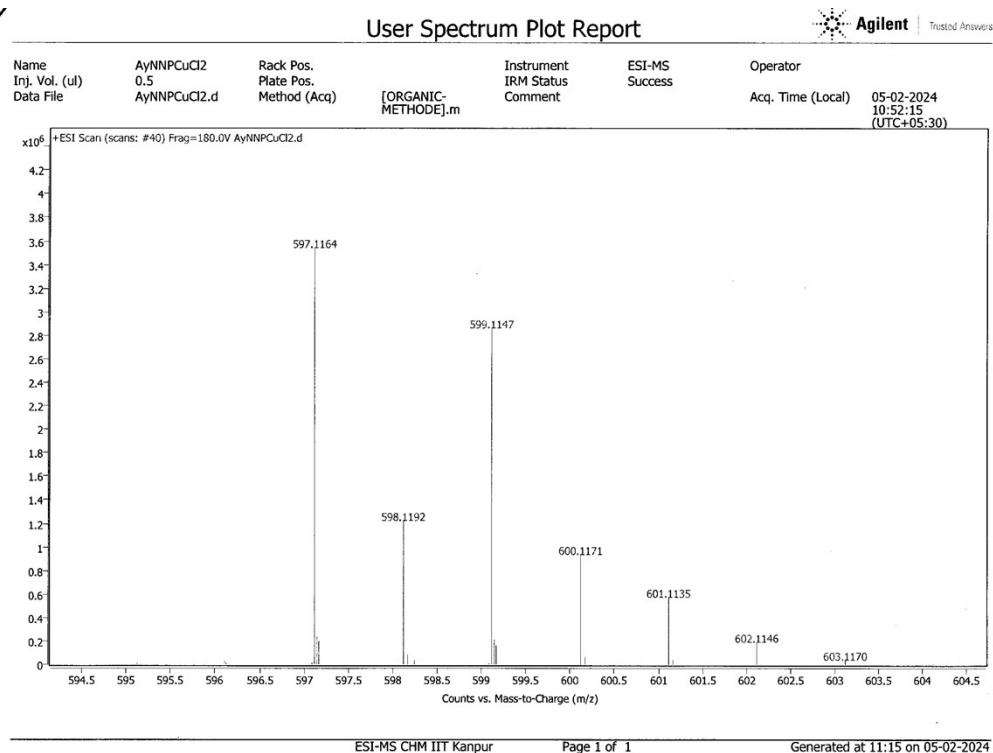

Figure S 83. Simulated ESI-MS of  $[\text{Cu}_2(\text{NNP})_2(\mu\text{-Cl})\text{Cl}_2][\text{CuCl}_2]$ ,

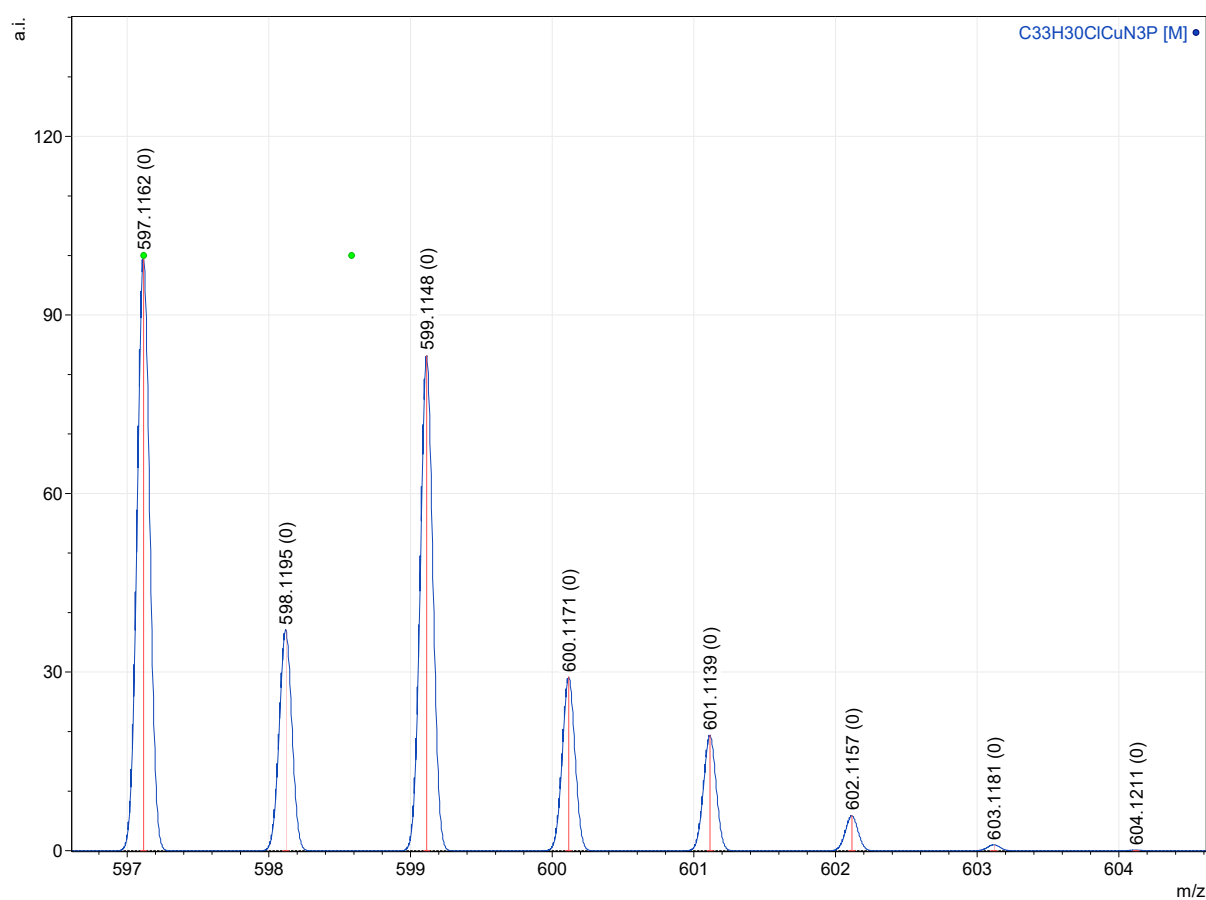

Figure S 84. Reduction of Cu(II) to Cu(I) using ascorbic acid

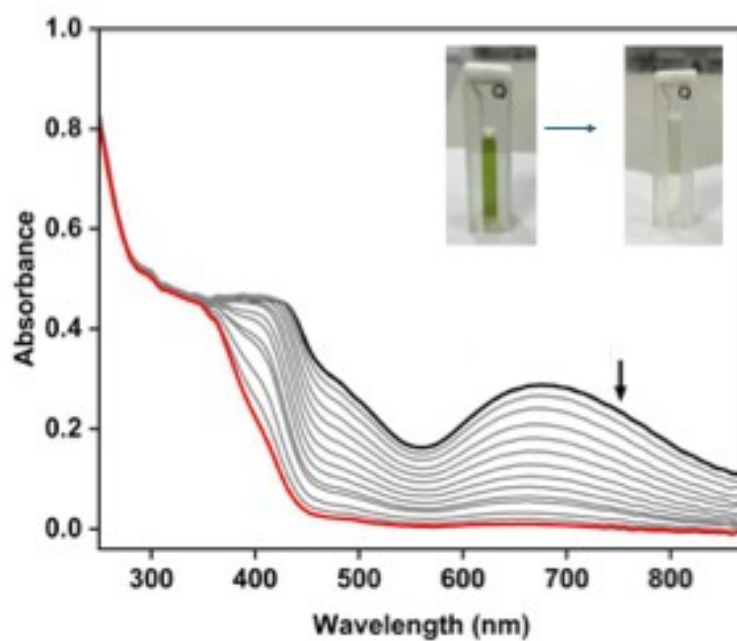

Absorbance spectra of  $[\text{Cu}_2(\text{NNP})_2(\mu\text{-Cl})\text{Cl}_2][\text{CuCl}_2]$  complex (1mM) in  $\text{CH}_3\text{CN}$  in the presence of ascorbic acid (0-2.6 eq) (5mM) in 5%  $\text{H}_2\text{O}$  in  $\text{CH}_3\text{CN}$ .

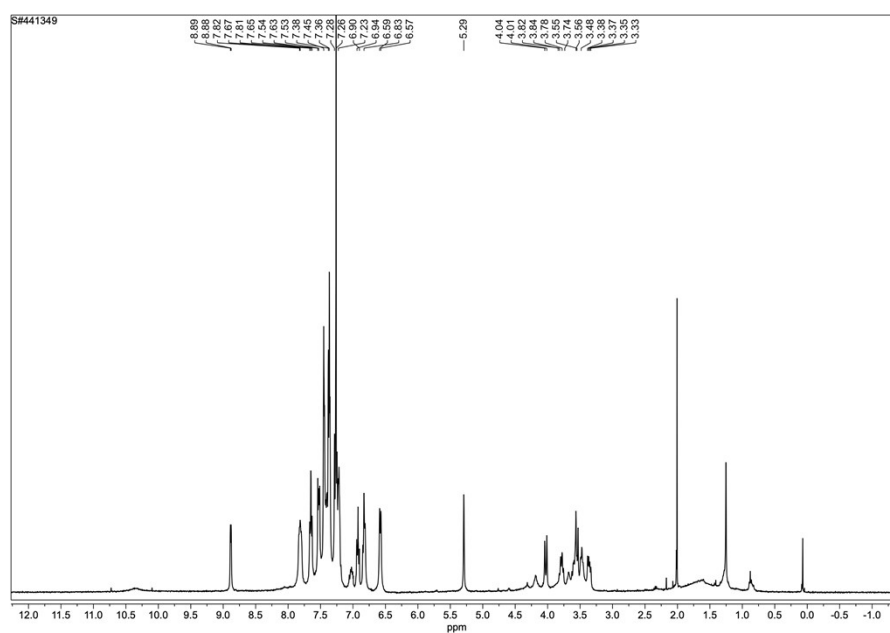

$^1\text{H}$  NMR spectrum of the  $[\text{Cu}_2(\text{NNP})_2(\mu\text{-Cl})\text{Cl}_2][\text{CuCl}_2]$  after adding ascorbic acid in  $\text{CDCl}_3$  at 298 K.

Figure S 85.  $^1\text{H}$  NMR titration for the transmetallation of  $\text{Zn(II)}$  by  $\text{Cu(I)}$  in  $\text{CDCl}_3:\text{CD}_3\text{CN}$  mixture at 298 K.

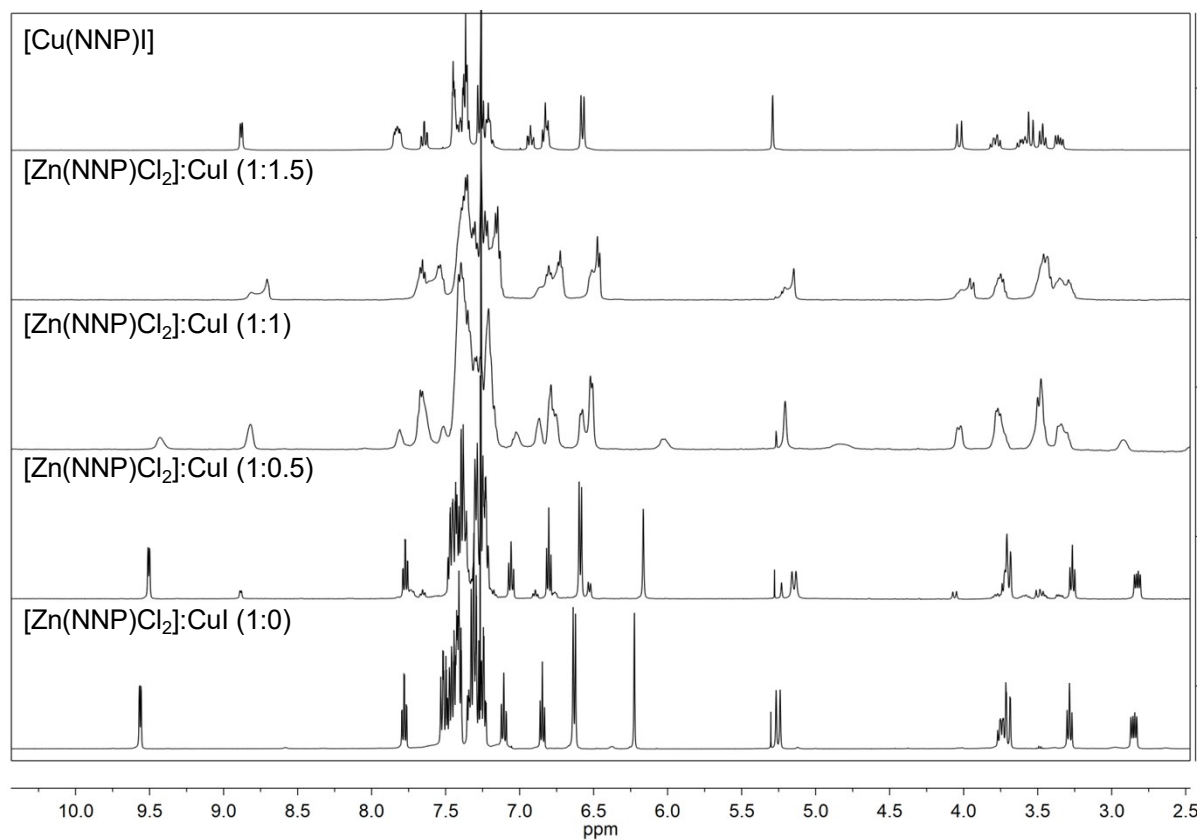

$^1\text{H}$  NMR titration of  $[\text{Zn}(\text{NNP})\text{Cl}_2]$  after addition of  $\text{CuI}$  (0-1.5eq) compared with directly prepared  $[\text{Cu}(\text{NNP})\text{I}]$  complex (top).

Figure S 86.  $^{31}\text{P}$  NMR titration for the transmetallation of Zn(II) by Cu(I) in  $\text{CDCl}_3:\text{CD}_3\text{CN}$  mixture at 298 K.

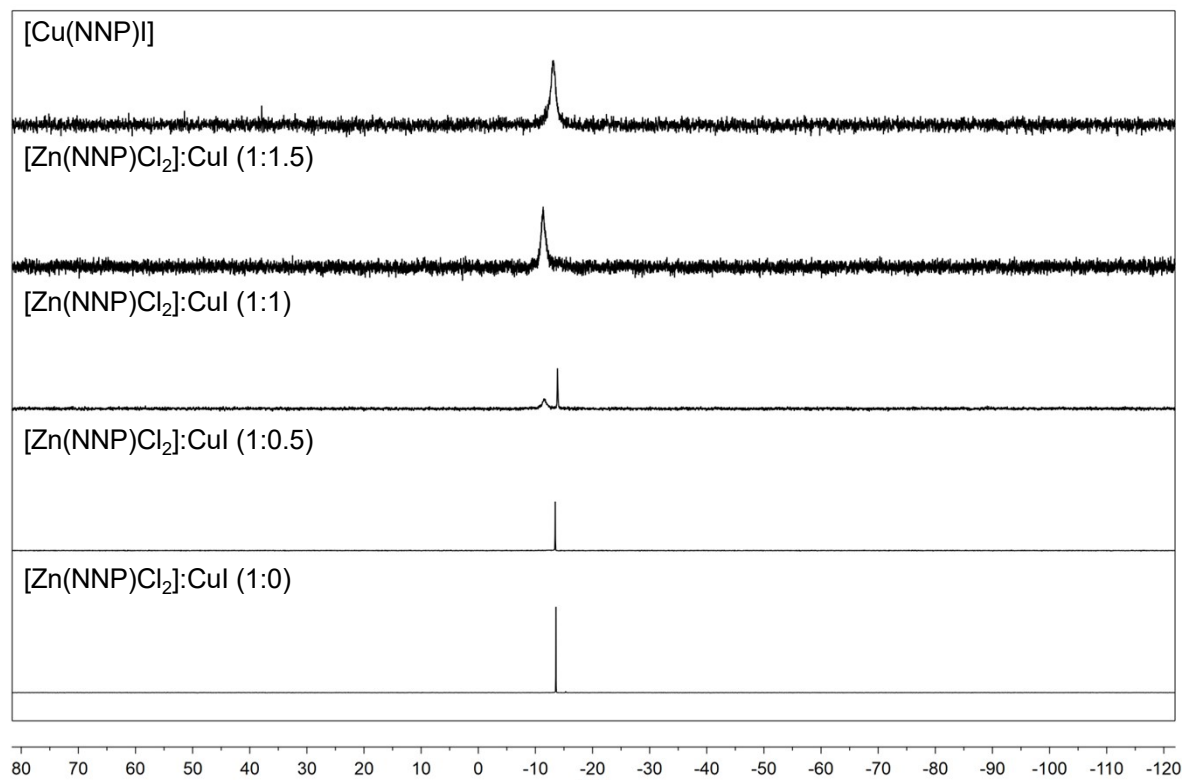

$^{31}\text{P}$  NMR titration of  $[\text{Zn}(\text{NNP})\text{Cl}_2]$  after addition of CuI (0-1.5eq) compared with directly prepared  $[\text{Cu}(\text{NNP})\text{I}]$  complex (top).

Figure S 87. ESI-MS for the transmetallation of Zn(II) by Cu(I).

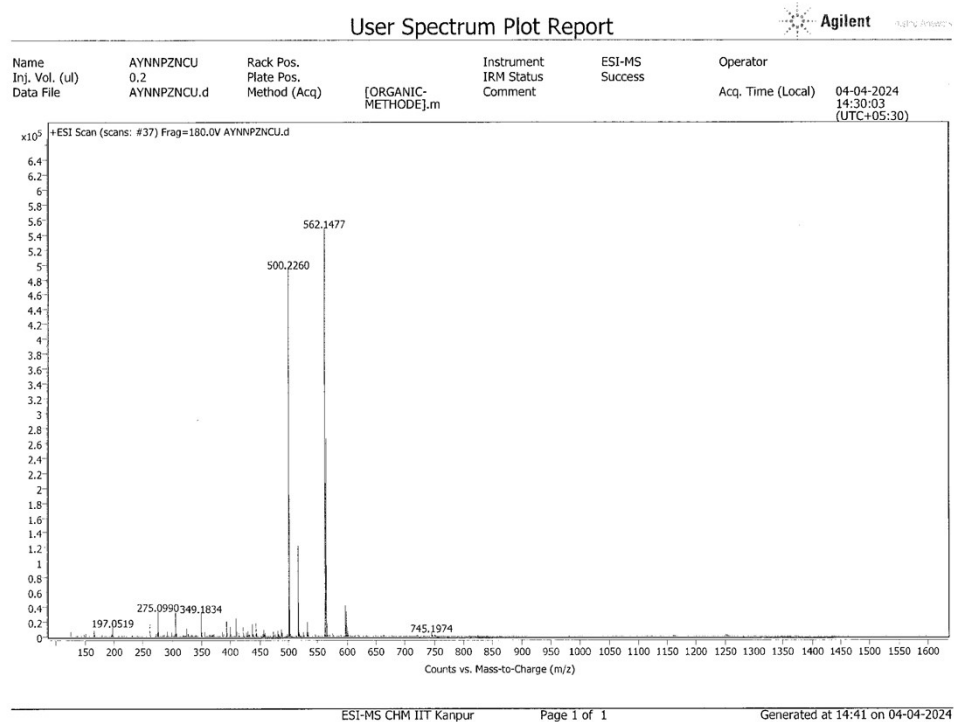

High resolution ESI-MS:  $m/z$  for  $[M-I]^+ = 562.1477$  (calcd. 562.1473) =  $[CuC_{33}H_{30}N_3P]^+$ .

# User Spectrum Plot Report

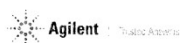

|                |             |              |                     |                   |                                 |
|----------------|-------------|--------------|---------------------|-------------------|---------------------------------|
| Name           | AYNNPZNCU   | Rack Pos.    | Instrument          | ESI-MS            | Operator                        |
| Inj. Vol. (ul) | 0.2         | Plate Pos.   | IRM Status          | Success           |                                 |
| Data File      | AYNNPZNCU.d | Method (Acq) | [ORGANIC-METHODE].m | Comment           |                                 |
|                |             |              |                     | Acq. Time (Local) | 04-04-2024 14:30:03 (UTC+05:30) |

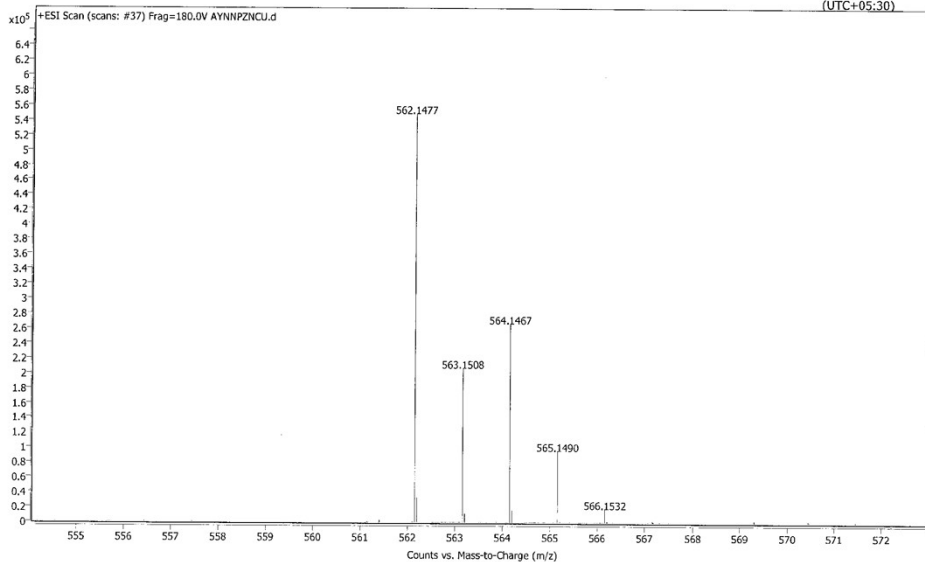

Figure S 88. Cyclic Voltammogram of  $[\text{Cu}(\text{NNP})(\text{CH}_3\text{CN})][\text{OTf}]$

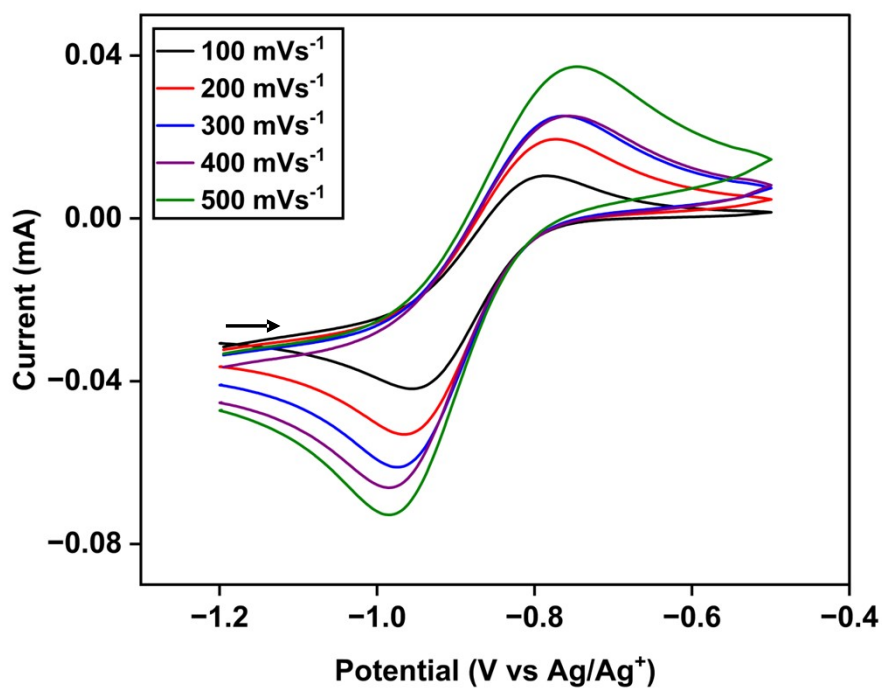

Cyclic Voltammograms of 1mM of  $[\text{Cu}(\text{NNP})(\text{CH}_3\text{CN})][\text{OTf}]$  complex at a static glassy Carbon working electrode with Ag/AgCl reference electrode, and a Pt wire auxiliary electrode at 25 °C in  $\text{CH}_3\text{CN}$  solution containing 0.1 M  $\text{TBAPF}_6$  (supporting electrolyte) at different scan rates under nitrogen atmosphere.



Figure S 89. Cyclic Voltammogram of  $[\text{Cu}(\text{NNP})(\text{CH}_3\text{CN})][\text{PF}_6]$

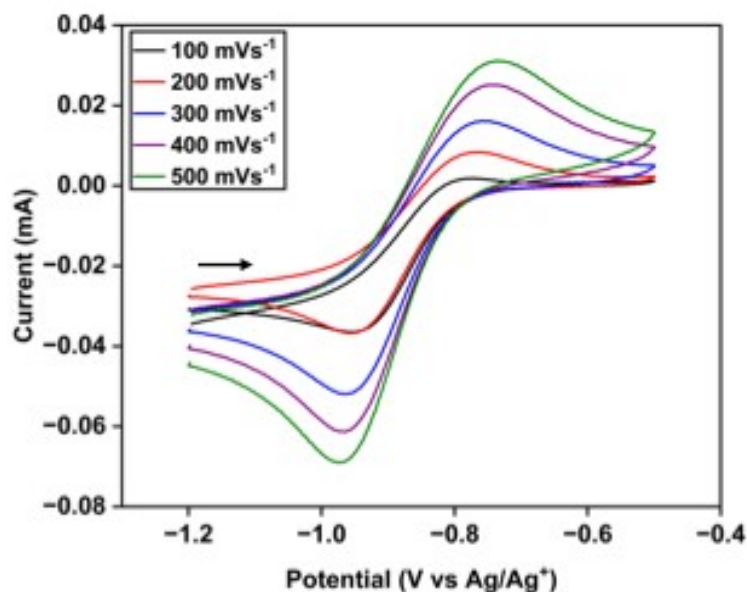

Cyclic Voltammograms of 1mM of  $[\text{Cu}(\text{NNP})(\text{CH}_3\text{CN})][\text{PF}_6]$  complex at a static glassy Carbon working electrode with  $\text{Ag}/\text{AgCl}$  reference electrode, and a Pt wire auxiliary electrode at 25 °C in  $\text{CH}_3\text{CN}$  solution containing 0.1 M  $\text{TBAPF}_6$  (supporting electrolyte) at different scan rates under nitrogen atmosphere.

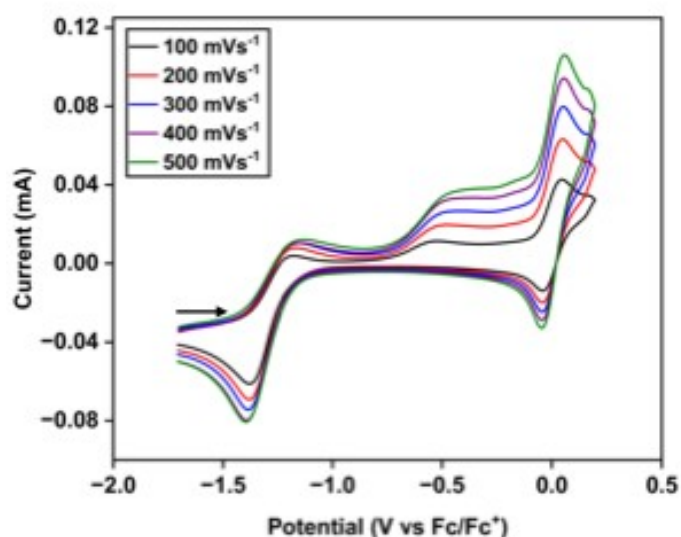

Cyclic Voltammograms of 1mM of  $[\text{Cu}(\text{NNP})(\text{CH}_3\text{CN})][\text{PF}_6]$  complex after the addition of 1 mM ferrocene at a static glassy Carbon working electrode with  $\text{Ag}/\text{AgCl}$  reference electrode, and a Pt wire auxiliary electrode at 25 °C in  $\text{CH}_3\text{CN}$  solution containing 0.1 M  $\text{TBAPF}_6$  (supporting electrolyte) at different scan rates under nitrogen atmosphere.

Figure S 90. Cyclic Voltammogram of [Cu(NNP)I]

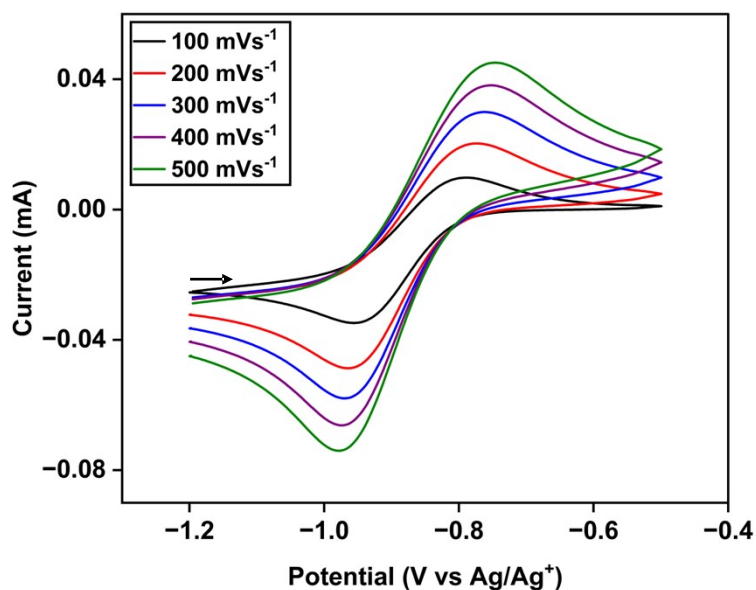

Cyclic Voltammograms of 1mM of [Cu(NNP)I] complex at a static glassy Carbon working electrode with Ag/AgCl reference electrode, and a Pt wire auxiliary electrode at 25 °C in CH<sub>3</sub>CN solution containing 0.1 M TBAPF<sub>6</sub> (supporting electrolyte) at different scan rates under nitrogen atmosphere.

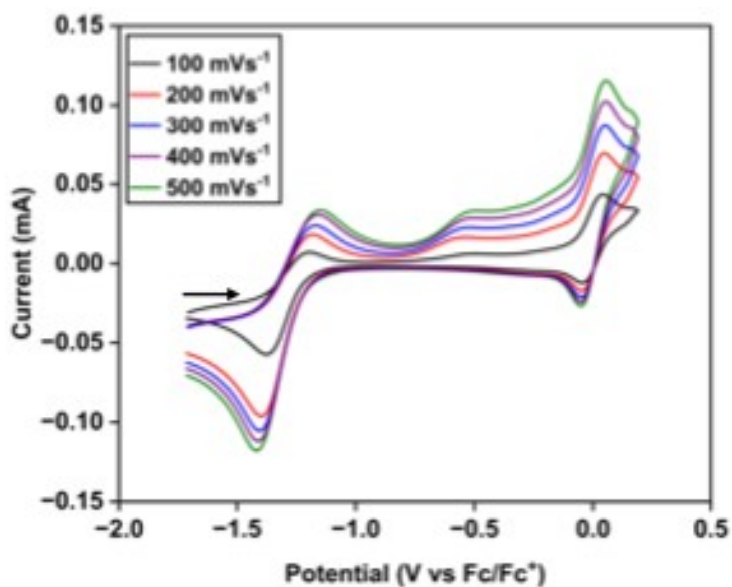

Cyclic Voltammograms of 1mM of [Cu(NNP)I] complex after the addition of 1 mM ferrocene at a static glassy Carbon working electrode with Ag/AgCl reference electrode, and a Pt wire auxiliary electrode at 25 °C in CH<sub>3</sub>CN solution containing 0.1 M TBAPF<sub>6</sub> (supporting electrolyte) at different scan rates under nitrogen atmosphere.

Figure S 91. Cyclic Voltammogram of [Cu(NNP)Cl]

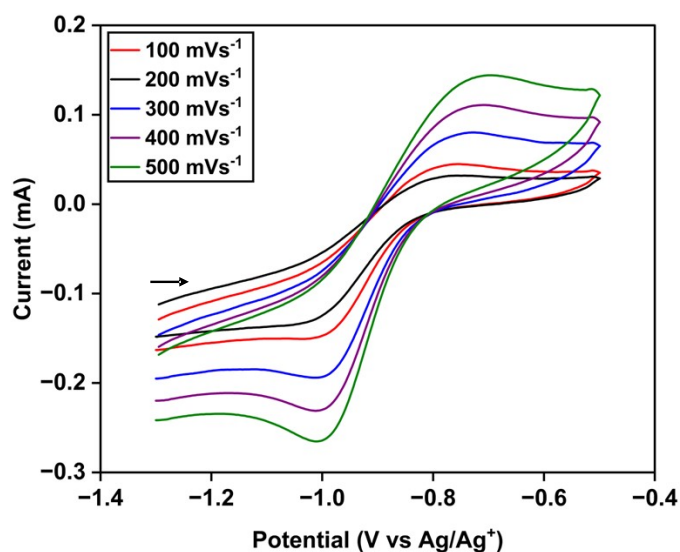

Cyclic Voltammograms of 1mM of [Cu(NNP)Cl] complex at a static glassy Carbon working electrode with Ag/AgCl reference electrode, and a Pt wire auxiliary electrode at 25 °C in CH<sub>3</sub>CN solution containing 0.1 M TBAPF<sub>6</sub> (supporting electrolyte) at different scan rates under nitrogen atmosphere.

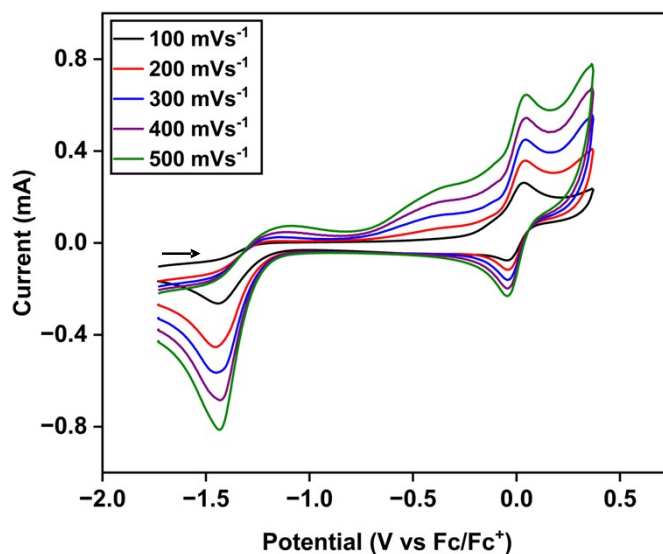

Cyclic Voltammograms of 1mM of [Cu(NNP)Cl] complex after the addition of 1 mM ferrocene at a static glassy Carbon working electrode with Ag/AgCl reference electrode, and a Pt wire auxiliary electrode at 25 °C in CH<sub>3</sub>CN solution containing 0.1 M TBAPF<sub>6</sub> (supporting electrolyte) at different scan rates under nitrogen atmosphere.

Figure S 92. Cyclic Voltammogram of  $[\text{Cu}_2(\text{NNP})_2(\mu\text{-Cl})\text{Cl}_2][\text{CuCl}_2]$

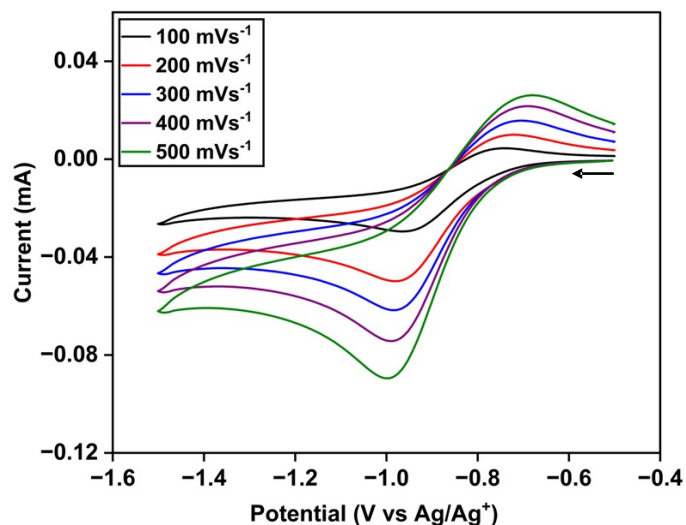

Cyclic Voltammograms of 1mM of  $[\text{Cu}_2(\text{NNP})_2(\mu\text{-Cl})\text{Cl}_2][\text{CuCl}_2]$  complex at a static glassy Carbon working electrode with Ag/AgCl reference electrode, and a Pt wire auxiliary electrode at 25 °C in  $\text{CH}_3\text{CN}$  solution containing 0.1 M TBAPF<sub>6</sub> (supporting electrolyte) at different scan rates under nitrogen atmosphere.

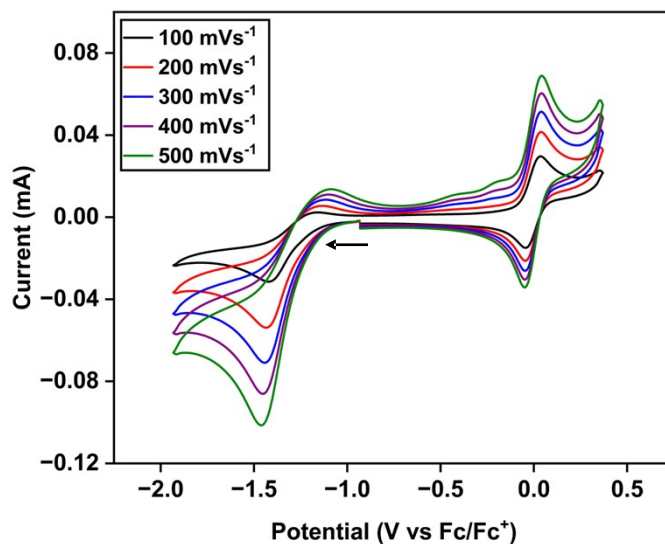

Cyclic Voltammograms of 1mM of  $[\text{Cu}_2(\text{NNP})_2(\mu\text{-Cl})\text{Cl}_2][\text{CuCl}_2]$  complex after the addition of 1 mM ferrocene at a static glassy Carbon working electrode with Ag/AgCl reference electrode, and a Pt wire auxiliary electrode at 25 °C in  $\text{CH}_3\text{CN}$  solution containing 0.1 M TBAPF<sub>6</sub> (supporting electrolyte) at different scan rates under nitrogen atmosphere.

Figure S 93. ORTEP of NNP

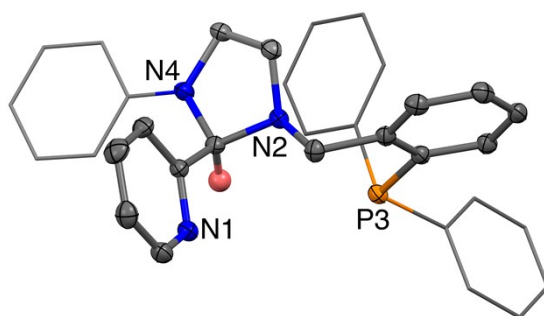

ORTEP of NNP at 50% probability level. Hydrogen (except C\*H) and solvents are omitted for clarity.

Figure S 94. ORTEP of [Zn(NNP)Cl<sub>2</sub>]

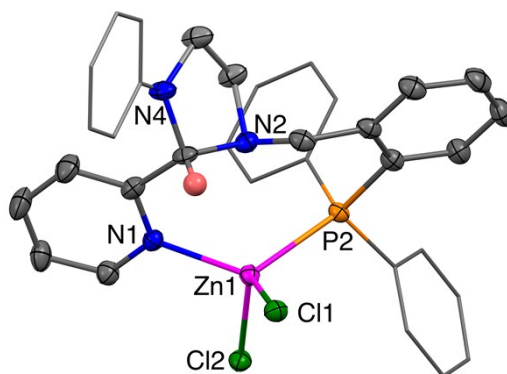

ORTEP of [Zn(NNP)Cl<sub>2</sub>] at 50% probability level. Hydrogen (except C\*H) and solvents are omitted for clarity. Selected bond distance [Å] and angle [°]: Zn(1)-Cl(1), 2.2685(7); Zn(1)-Cl(2), 2.2572(7); Zn(1)-P(3), 2.4224(7); Zn(1)-N(1), 2.075(2); Cl(2)-Zn(1)-Cl(1), 111.85(3); P(3)-Zn(1)-Cl(1), 101.03(3); P(3)-Zn(1)-Cl(2), 111.86(3); N(1)-Zn(1)-Cl(1), 99.98(6); N(1)-Zn(1)-Cl(2), 109.54(6); N(1)-Zn(1)-P(3), 121.41(6).

Figure S 95. ORTEP of  $[\text{Ni}(\text{NNP})\text{Cl}_2]\cdot\text{CH}_3\text{CN}$

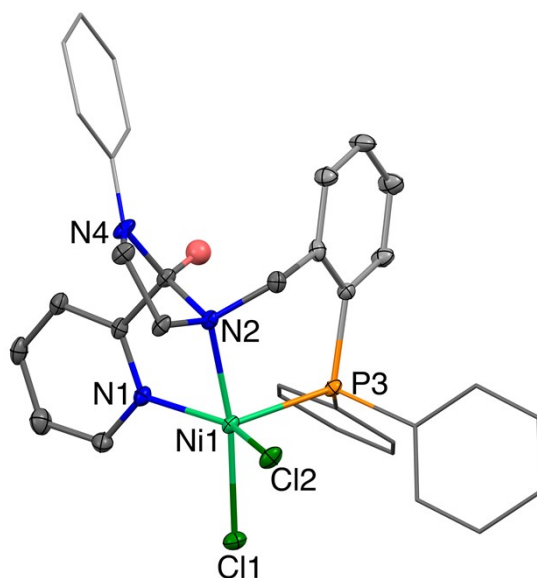

ORTEP of  $[\text{Ni}(\text{NNP})\text{Cl}_2]\cdot\text{CH}_3\text{CN}$  at 50% probability level. Hydrogen (except C\*H) and solvents are omitted for clarity. Selected bond distance [ $\text{\AA}$ ] and angle [ $^\circ$ ]: Ni(1)-Cl(1), 2.3460(9); Ni(1)-Cl(2), 2.2870(9); Ni(1)-P(3), 2.3252(9); Ni(1)-N(1), 2.070(3); Ni(1)-N(2), 2.137(2); Cl(2)-Ni(1)-Cl(1), 93.78(3); P(3)-Ni(1)-Cl(1), 94.11(3); P(3)-Ni(1)-Cl(2), 103.83(3); N(1)-Ni(1)-Cl(1), 93.84(7); N(1)-Ni(1)-Cl(2), 145.50(7); N(1)-Ni(1)-P(3), 109.10(7); N(2)-Ni(1)-Cl(2), 89.69(7); N(2)-Ni(1)-Cl(1), 171.31(7); N(2)-Ni(1)-P(3), 92.78(7); N(2)-Ni(1)-P(3), 78.89(10).

Figure S 96. ORTEP of [Pd(NNP)Cl][Cl]

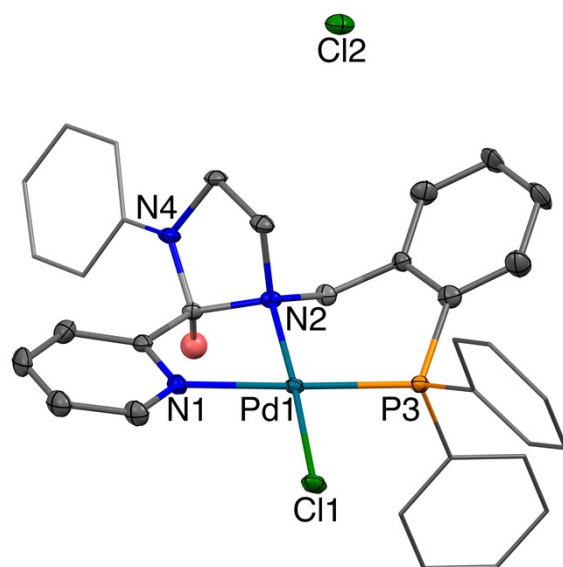

ORTEP of [Pd(NNP)Cl][Cl] at 50% probability level. Hydrogen (except C\*H) and solvents are omitted for clarity. Selected bond distance [Å] and angle [°]: Pd(1)-Cl(1), 2.2918(10); Pd(1)-P(3), 2.2401(11); Pd(1)-N(1), 2.080(3); Pd(1)-N(2), 2.060(3); P(3)-Pd(1)-Cl(1), 87.47(4); N(1)-Pd(1)-Cl(1), 96.12(9); N(1)-Pd(1)-P(3), 176.12(9); N(2)-Pd(1)-Cl(1), 176.99(9); N(2)-Pd(1)-P(3), 95.47(9); N(2)-Pd(1)-N(1), 80.92(12).



Figure S 97. ORTEP of [Pd(NNP)(SPhCH<sub>3</sub>)] [PF<sub>6</sub>]

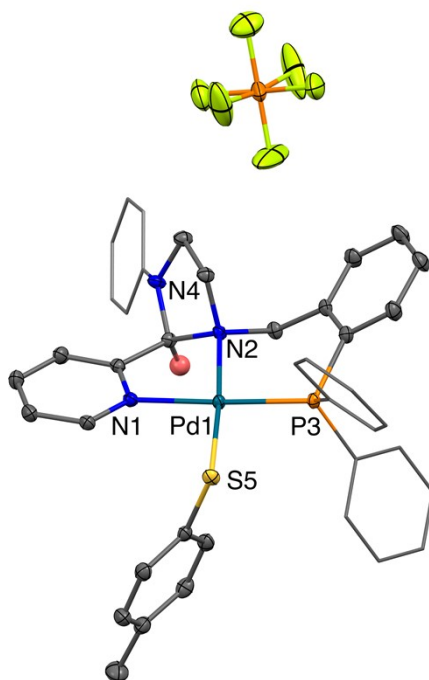

ORTEP of [Pd(NNP)(SPhCH<sub>3</sub>)] [PF<sub>6</sub>] at 50% probability level. Hydrogen (except C\*H) and solvents are omitted for clarity. Selected bond distance [Å] and angle [°]: Pd(1)-N(1), 2.099(2); Pd(1)-P(3), 2.2313(6); Pd(1)-S(5), 2.2899(6); Pd(1)-N(2), 2.1061(19); P(3)-Pd(1)-S(5), 87.45(2); N(1)-Pd(1)-S(5), 95.29(6); N(1)-Pd(1)-P(3), 177.22(6); N(2)-Pd(1)-S(5), 175.78(5); N(2)-Pd(1)-P(3), 96.68(5); N(2)-Pd(1)-N(1), 80.58(7).

Figure S 98. ORTEP of [Ru(NNP)(PPh<sub>3</sub>)Cl<sub>2</sub>]

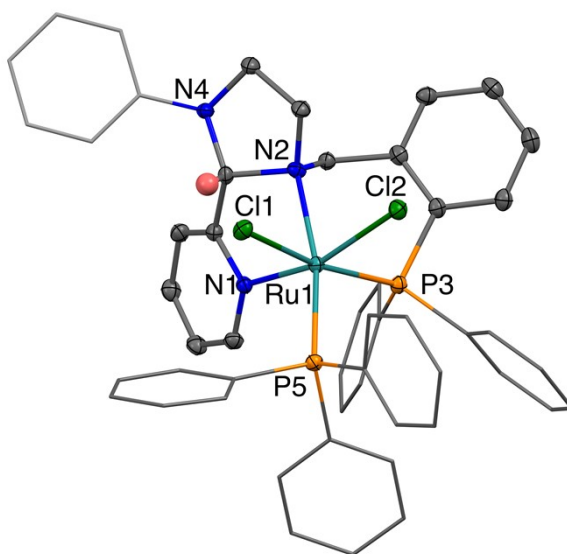

ORTEP of [Ru(NNP)(PPh<sub>3</sub>)Cl<sub>2</sub>] at 50% probability level. Hydrogen and solvents are omitted for clarity. Selected bond distance [Å] and angle [°]: Ru(1)-Cl(1), 2.4958(8); Ru(1)-Cl(2), 2.4173(8); Ru(1)-P(5), 2.3403(9); Ru(1)-P(3), 2.2924(9); Ru(1)-N(1), 2.133(2); Ru(1)-N(2), 2.221(2); Cl(2)-Ru(1)-Cl(1), 84.79(3); P(5)-Ru(1)-Cl(1), 83.53(3); P(5)-Ru(1)-Cl(2), 100(17); P(3)-Ru(1)-Cl(1), 168.55(3); P(3)-Ru(1)-Cl(2), 83.80(3); P(3)-Ru(1)-P(5), 99.50(3); N(1)-Ru(1)-Cl(1), 97.09(7); N(1)-Ru(1)-Cl(2), 161.51(7); N(1)-Ru(1)-P(5), 98.32(7); N(1)-Ru(1)-P(3), 93.41(7); N(2)-Ru(1)-Cl(1), 85.79(7); N(2)-Ru(1)-Cl(2), 85.39(7); N(2)-Ru(1)-P(5), 167.44(7); N(2)-Ru(1)-P(3), 92.26(7); N(2)-Ru(1)-N(1), 76.43(9).

Figure S 99. ORTEP of *anti-rac*-[Ru(NNP)(H)Cl(CO)]

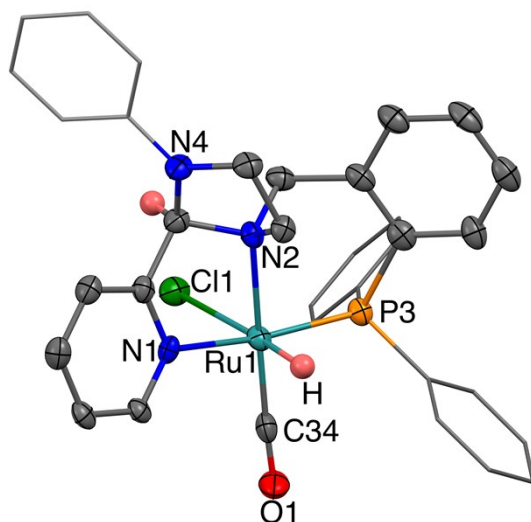

ORTEP of *anti-rac*-[Ru(NNP)(H)Cl(CO)] at 50% probability level. Hydrogen (except Ru-H and C\*H) and solvents are omitted for clarity. Selected bond distance [Å] and angle [°]: Ru(1)-P(3), 2.2525(10); Ru(1)-Cl(1), 2.5092(10); Ru(1)-N(1), 2.127(3); Ru(1)-N(2), 2.199(3); Ru(1)-C(34), 1.830(4); Cl(1)-Ru(1)-P(3), 98.87(4); N(1)-Ru(1)-P(3), 170.19(9); N(1)-Ru(1)-Cl(1), 84.80(8); N(2)-Ru(1)-P(3), 93.18(8); N(2)-Ru(1)-Cl(1), 86.51(8); N(2)-Ru(1)-N(1), 77.90(12); C(34)-Ru(1)-P(3), 88.65(12); C(34)-Ru(1)-Cl(1), 98.04(12); C(34)-Ru(1)-N(1), 99.89(14); C(34)-Ru(1)-N(2), 174.78(14).

Figure S 100. ORTEP of *syn-rac*-[Ru(NNP)(H)Cl(CO)]

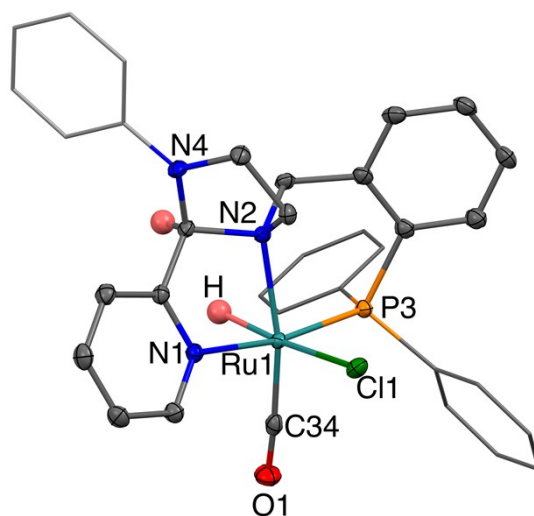

ORTEP of *syn-rac*-[Ru(NNP)(H)Cl(CO)] at 50% probability level. Hydrogen (except Ru-H and C\*H) and solvents are omitted for clarity. Selected bond distance [Å] and angle [°]: Ru(1)-P(3), 2.2646(6); Ru(1)-Cl(1), 2.5318(6); Ru(1)-N(1), 2.1142(18); Ru(1)-N(2), 2.2172(18); Ru(1)-C(34), 1.825(2); Cl(1)-Ru(1)-P(3), 95.59(2); N(1)-Ru(1)-P(3), 170.76(5); N(1)-Ru(1)-Cl(1), 87.36(5); N(2)-Ru(1)-P(3), 93.80(5); N(2)-Ru(1)-Cl(1), 90.66(5); N(2)-Ru(1)-N(1), 77.38(7); C(34)-Ru(1)-P(3), 89.60(7); C(34)-Ru(1)-Cl(1), 100.79(7); C(34)-Ru(1)-N(1), 98.47(8); C(34)-Ru(1)-N(2), 167.69(8).

Figure S 101. ORTEP of *anti-rac*-[Ru(NNP)(H)( $\eta^l$ -BH<sub>4</sub>)(CO)]

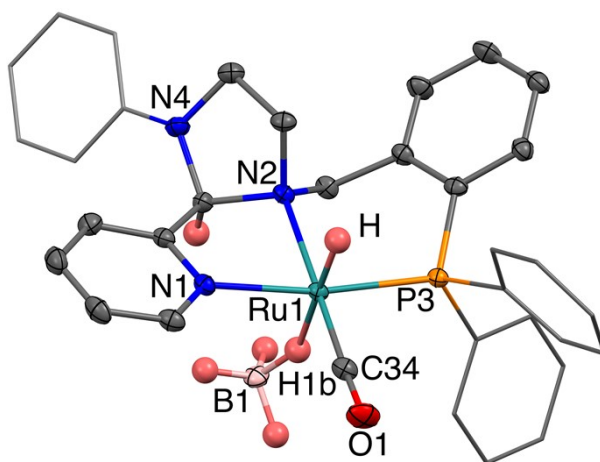

ORTEP of *anti-rac*-[Ru(NNP)(H)( $\eta^l$ -BH<sub>4</sub>)(CO)].at 50% probability level. Hydrogen (except Ru-H, BH<sub>4</sub> and C\*H) and solvents are omitted for clarity. Selected bond distance [Å] and angle [°]: Ru(1)-P(3), 2.2567(5); Ru(1)-H, 1.551; Ru(1)-H1b, 1.913; Ru(1)-N(1), 2.1120(16); Ru(1)-N(2), 2.1792(16); Ru(1)-C(34), 1.829(2); N(2)-Ru(1)-P(3), 92.99(4); N(1)-Ru(1)-P(3), 170.27(5); N(2)-Ru(1)-N(1), 78.33(6); C(34)-Ru(1)-P(3), 89.04(7); C(34)-Ru(1)-N(1), 99.28(8); C(34)-Ru(1)-N(2), 175.12(8).

Figure S 102. ORTEP of [Ru(NNP)(CS<sub>2</sub>H)<sub>2</sub>(CO)]

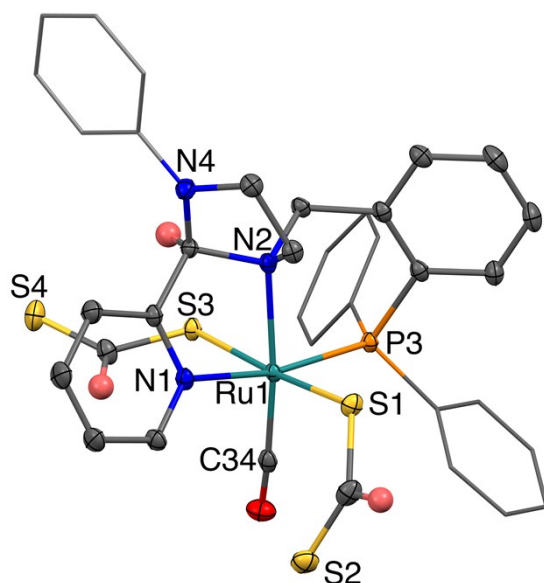

ORTEP of [Ru(NNP)(CS<sub>2</sub>H)<sub>2</sub>(CO)] at 50% probability level. Hydrogen (except CS<sub>2</sub>H and C\*H) and solvents are omitted for clarity. Selected bond distance [Å] and angle [°]: Ru(1)-P(3), 2.3045(6); Ru(1)-S(3), 2.4042(6); Ru(1)-S(1), 2.3951(7); Ru(1)-N(1), 2.123(2); Ru(1)-N(2), 2.243(2); Ru(1)-C(34), 1.862(3); P(3)-Ru(1)-S(3), 89.98(2); S(1)-Ru(1)-S(3), 174.46(2); S(1)-Ru(1)-P(3), 91.16(2); N(2)-Ru(1)-S(3), 87.58(5); N(2)-Ru(1)-P(3), 92.99(5); N(2)-Ru(1)-S(1), 86.94(5); N(1)-Ru(1)-S(3), 88.45(6); N(1)-Ru(1)-P(3), 168.82(6); N(1)-Ru(1)-S(1), 89.38(6); N(1)-Ru(1)-N(2), 75.88(7); C(34)-Ru(1)-S(3), 86.51(8); C(34)-Ru(1)-P(3), 89.61(7); C(34)-Ru(1)-S(1), 98.92(8); C(34)-Ru(1)-N(1), 101.34(9); C(34)-Ru(1)-N(2), 173.54(9).

Figure S 103. ORTEP of [Cu(NNP)I]

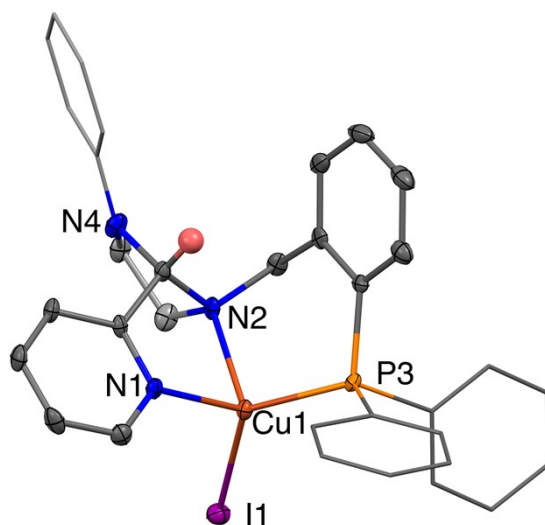

ORTEP of [(NNP)CuI] at 50% probability level. Hydrogens (except C\*H) and solvents are omitted for clarity. Selected bond distance [ $\text{\AA}$ ] and angle [ $^\circ$ ]: Cu(1)-I(1), 2.5490(5); Cu(1)-P(3), 2.1800(9); Cu(1)-N(1), 2.072(3); Cu(1)-N(2), 2.160(3); P(3)-Cu(1)-I(1), 123.42(3); N(1)-Cu(1)-I(1), 109.99(8); N(1)-Cu(1)-P(3), 121.02(9); N(2)-Cu(1)-I(1), 110.36(8); N(2)-Cu(1)-P(3), 100.76(8); N(2)-Cu(1)-N(1), 80.79(11).

Figure S 104. ORTEP of [Cu(NNP)(PPh<sub>3</sub>)] [BF<sub>4</sub>]

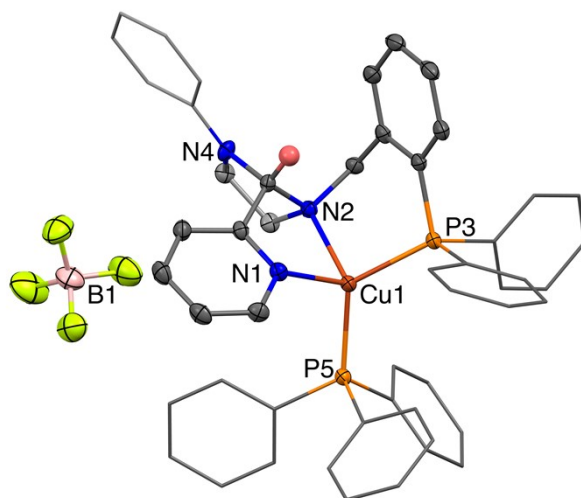

ORTEP of [Cu(NNP)(PPh<sub>3</sub>)] [BF<sub>4</sub>] at 50% probability level. Hydrogens (except C\*H) and solvents are omitted for clarity. Selected bond distance [Å] and angle [°]: Cu(1)-P(5), 2.2396(7); Cu(1)-P(3), 2.2489(7); Cu(1)- N(1), 2.103(2); Cu(1)-N(2), 2.1428(19); P(3)-Cu(1)-P(5), 122.62(2); N(1)-Cu(1)-P(5), 105.99(6); N(1)-Cu(1)-P(3), 116.28(6); N(2)-Cu(1)-P(5), 126.82(6); N(2)-Cu(1)-P(3), 97.01(6); N(2)-Cu(1)-N(1), 81.88(7).



Figure S 105. ORTEP of [Cu(NNP)Cl]

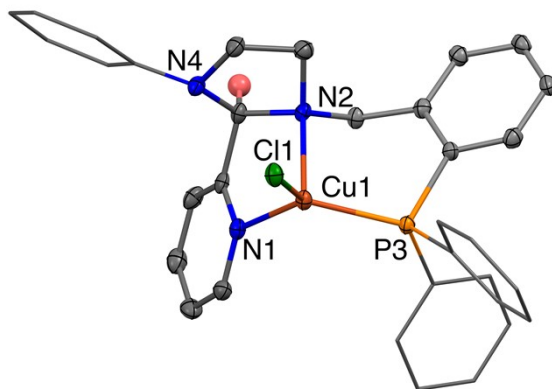

ORTEP of [Cu(NNP)Cl] at 50% probability level. Hydrogens (except C\*H) and solvents are omitted for clarity. Selected bond distance [Å] and angle [°]: Cu(1)-Cl(1), 2.2672(7); Cu(1)-P(3), 2.1959(7); Cu(1)-N(1), 2.076(2); Cu(1)-N(2), 2.230(2); P(3)-Cu(1)-Cl(1), 114.49(3); N(1)-Cu(1)-Cl(1), 122.59(6); N(1)-Cu(1)-P(3), 119.67(6); N(2)-Cu(1)-Cl(1), 110.79(6); N(2)-Cu(1)-P(3), 97.76(5); N(2)-Cu(1)-N(1), 79.87(8).

Figure S 106. ORTEP of  $[\text{Cu}_2(\text{NNP})_2(\mu\text{-Cl})\text{Cl}_2][\text{CuCl}_2]$

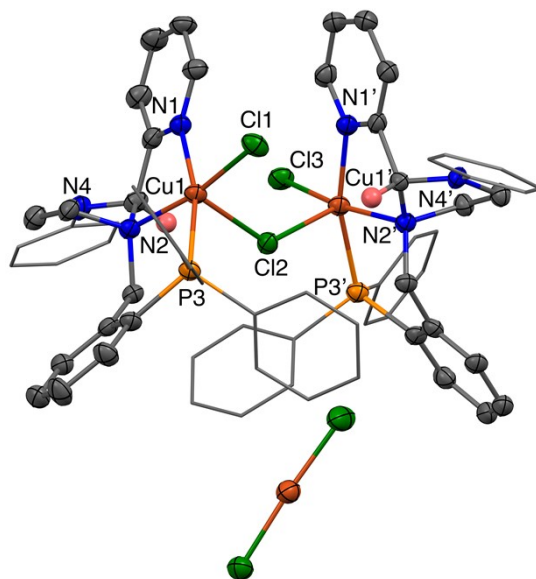

ORTEP of  $[\text{Cu}_2(\text{NNP})_2(\mu\text{-Cl})\text{Cl}_2][\text{CuCl}_2]$  at 50% probability level. Hydrogens (except C\*H) and solvents are omitted for clarity. Selected bond distance [ $\text{\AA}$ ] and angle [ $^\circ$ ]: Cu(1)-Cl(1), 2.2655(12); Cu(1)-P(3), 2.3216(12); Cu(1)-N(1), 2.018(3); Cu(1)-N(2), 2.087(4); P(3)-Cu(1)-Cl(1), 90.46(4); P(3)-Cu(1)-Cl(2), 94.43(4); N(1)-Cu(1)-Cl(2), 96.99(11); N(1)-Cu(1)-Cl(1), 94.87(11); N(1)-Cu(1)-P(3), 166.23(11); N(2)-Cu(1)-Cl(2), 88.64(10); N(2)-Cu(1)-Cl(1), 88.64(10); N(2)-Cu(1)-P(3), 91.88(9); N(2)-Cu(1)-N(1), 80.75(14); Cu(1)-Cl(2)-Cu(1'), 132.27(5).

|                                         |                                                                   |                     |
|-----------------------------------------|-------------------------------------------------------------------|---------------------|
| Identification code                     | 10febc_0m                                                         | CCDC2472269         |
| Empirical formula                       | C <sub>33</sub> H <sub>30</sub> N <sub>3</sub> P                  |                     |
| Formula weight                          | 499.600                                                           |                     |
| Temperature                             | 273.15 K                                                          |                     |
| Crystal system                          | orthorhombic                                                      |                     |
| Space group                             | Pbca                                                              |                     |
| Unit cell dimensions                    | a = 12.2438(3) Å                                                  | $\alpha = 90^\circ$ |
|                                         | b = 24.9067(7) Å                                                  | $\beta = 90^\circ$  |
|                                         | c = 35.1266(9) Å                                                  | $\gamma = 90^\circ$ |
| Volume                                  | 10711.9(5) Å <sup>3</sup>                                         |                     |
| Z                                       | 16                                                                |                     |
| Density (calculated)                    | 1.239 g/cm <sup>3</sup>                                           |                     |
| Absorption coefficient                  | 0.130 mm <sup>-1</sup>                                            |                     |
| F(000)                                  | 4227.8                                                            |                     |
| Crystal size                            | 0.25 × 0.21 × 0.16 mm <sup>3</sup>                                |                     |
| Radiation                               | Mo K $\alpha$ ( $\lambda = 0.71073$ )                             |                     |
| 2 $\theta$ range for data collection    | 5.08 to 56.64                                                     |                     |
| Index ranges                            | -16 ≤ h ≤ 16, -33 ≤ k ≤ 33, -46 ≤ l ≤ 46                          |                     |
| Reflections collected                   | 167147                                                            |                     |
| Independent reflections                 | 13318 [ $R_{\text{int}} = 0.0981$ , $R_{\text{sigma}} = 0.0463$ ] |                     |
| Completeness of theta = 28.310°         | 99.8 %                                                            |                     |
| Absorption correction                   | Semi-empirical from equivalents                                   |                     |
| Max. and min. transmission              | 0.746 and 0.685                                                   |                     |
| Refinement method                       | Full-matrix least-square on F <sup>2</sup>                        |                     |
| Data/restraints/parameters              | 13318/0/667                                                       |                     |
| Goodness-of-fit on F <sup>2</sup>       | 1.107                                                             |                     |
| Final R indexes [ $I \geq 2\sigma(I)$ ] | $R_1 = 0.0472$ , $wR_2 = 0.0949$                                  |                     |
| Final R indexes [all data]              | $R_1 = 0.0835$ , $wR_2 = 0.1208$                                  |                     |
| Largest diff. peak/hole                 | 0.51/-0.55 e Å <sup>-3</sup>                                      |                     |

Table S 1. Crystal data and structure refinement for 10febc\_0m (NNP)

|                                      |                                                                    |                           |
|--------------------------------------|--------------------------------------------------------------------|---------------------------|
| Identification code                  | 27octf                                                             | CCDC2472270               |
| Empirical formula                    | C <sub>33</sub> H <sub>30</sub> Cl <sub>2</sub> N <sub>3</sub> PZn |                           |
| Formula weight                       | 635.90                                                             |                           |
| Temperature                          | 273.15 K                                                           |                           |
| Crystal system                       | monoclinic                                                         |                           |
| Space group                          | P2 <sub>1</sub> /n                                                 |                           |
| Unit cell dimensions                 | a = 10.6154(9) Å                                                   | $\alpha = 90^\circ$       |
|                                      | b = 17.3832(15) Å                                                  | $\beta = 90.263(3)^\circ$ |
|                                      | c = 15.9872(16) Å                                                  | $\gamma = 90^\circ$       |
| Volume                               | 2950.1(5) Å <sup>3</sup>                                           |                           |
| Z                                    | 4                                                                  |                           |
| Density (calculated)                 | 1.432 g/cm <sup>3</sup>                                            |                           |
| Absorption coefficient               | 1.096 mm <sup>-1</sup>                                             |                           |
| F(000)                               | 1315.5                                                             |                           |
| Crystal size                         | 0.25 × 0.21 × 0.16 mm <sup>3</sup>                                 |                           |
| Radiation                            | Mo K $\alpha$ ( $\lambda = 0.71073$ )                              |                           |
| 2 $\theta$ range for data collection | 4.5 to 56.62°                                                      |                           |
| Index ranges                         | -14 ≤ h ≤ 14, -23 ≤ k ≤ 23, -21 ≤ l ≤ 21                           |                           |
| Reflections collected                | 47036                                                              |                           |
| Independent reflections              | 7343 [R <sub>int</sub> = 0.0639, R <sub>sigma</sub> = 0.0403]      |                           |
| Completeness of theta = 28.310°      | 99.9 %                                                             |                           |
| Absorption correction                | Semi-empirical from equivalents                                    |                           |
| Max. and min. transmission           | 0.746 and 0.701                                                    |                           |
| Refinement method                    | Full-matrix least-square on F <sup>2</sup>                         |                           |
| Data/restraints/parameters           | 7343/0/361                                                         |                           |
| Goodness-of-fit on F <sup>2</sup>    | 1.070                                                              |                           |
| Final R indexes [I ≥ 2σ (I)]         | R <sub>1</sub> = 0.0434, wR <sub>2</sub> = 0.0946                  |                           |
| Final R indexes [all data]           | R <sub>1</sub> = 0.0594, wR <sub>2</sub> = 0.1074                  |                           |
| Largest diff. peak/hole              | 2.32/-0.92 e Å <sup>-3</sup>                                       |                           |

Table S 2. Crystal data and structure refinement for 27octf [Zn(NNP)Cl<sub>2</sub>]

|                                         |                                                                    |                            |
|-----------------------------------------|--------------------------------------------------------------------|----------------------------|
| Identification code                     | 26maya_0m                                                          | CCDC2472271                |
| Empirical formula                       | C <sub>35</sub> H <sub>33</sub> Cl <sub>2</sub> N <sub>4</sub> NiP |                            |
| Formula weight                          | 670.251                                                            |                            |
| Temperature                             | 273.15                                                             |                            |
| Crystal system                          | triclinic                                                          |                            |
| Space group                             | P-1                                                                |                            |
| Unit cell dimensions                    | a = 9.3630(19)Å                                                    | $\alpha = 77.395(5)^\circ$ |
|                                         | b = 11.082(2)Å                                                     | $\beta = 88.124(5)^\circ$  |
|                                         | c = 17.163(3)Å                                                     | $\gamma = 66.360(6)^\circ$ |
| Volume/Å <sup>3</sup>                   | 1589.1(5)                                                          |                            |
| Z                                       | 2                                                                  |                            |
| Density (calculated)                    | 1.401 g/cm <sup>3</sup>                                            |                            |
| Absorption coefficient                  | 0.860 mm <sup>-1</sup>                                             |                            |
| F(000)                                  | 697.9                                                              |                            |
| Crystal size                            | 0.26 × 0.25 × 0.21 mm <sup>3</sup>                                 |                            |
| Radiation                               | Mo K $\alpha$ ( $\lambda = 0.71073$ )                              |                            |
| 2 $\Theta$ range for data collection /° | 5.22 to 56.8                                                       |                            |
| Index ranges                            | -12 ≤ h ≤ 12, -14 ≤ k ≤ 14, -22 ≤ l ≤ 22                           |                            |
| Reflections collected                   | 23988                                                              |                            |
| Independent reflections                 | 7863 [ $R_{\text{int}} = 0.0624$ , $R_{\text{sigma}} = 0.0663$ ]   |                            |
| Completeness of theta = 28.310°         | 98.5%                                                              |                            |
| Absorption correction                   | Semi-empirical from equivalents                                    |                            |
| Max. and min. transmission              | 0.746 and 0.674                                                    |                            |
| Refinement method                       | Full-matrix least-square on F <sup>2</sup>                         |                            |
| Data/restraints/parameters              | 7863/0/520                                                         |                            |
| Goodness-of-fit on F <sup>2</sup>       | 1.083                                                              |                            |
| Final R indexes [ $I \geq 2\sigma(I)$ ] | $R_1 = 0.0546$ , $wR_2 = 0.1104$                                   |                            |
| Final R indexes [all data]              | $R_1 = 0.0721$ , $wR_2 = 0.1211$                                   |                            |
| Largest diff. peak/hole                 | 1.47/-0.73e Å <sup>-3</sup>                                        |                            |

Table S 3. Crystal data and structure refinement for 26maya\_0m [Ni(NNP)Cl<sub>2</sub>]·CH<sub>3</sub>CN

Table S 4. Crystal data and structure refinement for 3febd [Pd(NNP)Cl][Cl].

|                                         |                                                                     |                            |
|-----------------------------------------|---------------------------------------------------------------------|----------------------------|
| Identification code                     | 3febd                                                               | CCDC2472560                |
| Empirical formula                       | C <sub>37</sub> H <sub>40</sub> Cl <sub>2</sub> N <sub>3</sub> OPPd |                            |
| Formula weight                          | 787.074                                                             |                            |
| Temperature                             | 273.15 K                                                            |                            |
| Crystal system                          | monoclinic                                                          |                            |
| Space group                             | P2 <sub>1</sub> /c                                                  |                            |
| Unit cell dimensions                    | a = 19.162(4) Å                                                     | $\alpha = 90^\circ$        |
|                                         | b = 9.563(2) Å                                                      | $\beta = 101.933(7)^\circ$ |
|                                         | c = 20.013(5) Å                                                     | $\gamma = 90^\circ$        |
| Volume                                  | 3588.2(15) Å <sup>3</sup>                                           |                            |
| Z                                       | 4                                                                   |                            |
| Density (calculated)                    | 1.457 g/cm <sup>3</sup>                                             |                            |
| Absorption coefficient                  | 0.751 mm <sup>-1</sup>                                              |                            |
| F(000)                                  | 1622.4                                                              |                            |
| Crystal size                            | 0.25 × 0.21 × 0.16 mm <sup>3</sup>                                  |                            |
| Radiation                               | Mo K $\alpha$ ( $\lambda = 0.71073$ )                               |                            |
| 2 $\Theta$ range for data collection    | 5.04 to 57.08                                                       |                            |
| Index ranges                            | -25 ≤ h ≤ 25, -12 ≤ k ≤ 12, -26 ≤ l ≤ 26                            |                            |
| Reflections collected                   | 70299                                                               |                            |
| Independent reflections                 | 9045 [ $R_{\text{int}} = 0.1196$ , $R_{\text{sigma}} = 0.0667$ ]    |                            |
| Completeness of theta = 28.310°         | 99.0 %                                                              |                            |
| Absorption correction                   | Semi-empirical from equivalents                                     |                            |
| Max. and min. transmission              | 0.746 and 0.578                                                     |                            |
| Refinement method                       | Full-matrix least-square on F <sup>2</sup>                          |                            |
| Data/restraints/parameters              | 9045/0/433                                                          |                            |
| Goodness-of-fit on F <sup>2</sup>       | 1.046                                                               |                            |
| Final R indexes [ $I \geq 2\sigma(I)$ ] | $R_1 = 0.0591$ , $wR_2 = 0.1131$                                    |                            |
| Final R indexes [all data]              | $R_1 = 0.0773$ , $wR_2 = 0.1203$                                    |                            |
| Largest diff. peak/hole                 | 1.05/-2.01 e Å <sup>-3</sup>                                        |                            |

Table S 5. Crystal data and structure refinement for 1augb\_0m [Pd(NNP)(SPhCH<sub>3</sub>)] [PF<sub>6</sub>].

|                                         |                                                                                                  |                            |
|-----------------------------------------|--------------------------------------------------------------------------------------------------|----------------------------|
| Identification code                     | 1augb_0m                                                                                         | CCDC2472273                |
| Empirical formula                       | C <sub>42</sub> H <sub>41</sub> Cl <sub>4</sub> F <sub>6</sub> N <sub>3</sub> P <sub>2</sub> PdS |                            |
| Formula weight                          | 1044.043                                                                                         |                            |
| Temperature                             | 273.15 K                                                                                         |                            |
| Crystal system                          | triclinic                                                                                        |                            |
| Space group                             | P-1                                                                                              |                            |
| Unit cell dimensions                    | a = 9.4411(3) Å                                                                                  | $\alpha = 83.854(1)^\circ$ |
|                                         | b = 13.4278(4) Å                                                                                 | $\beta = 76.261(1)^\circ$  |
|                                         | c = 17.6952(5) Å                                                                                 | $\gamma = 78.513(1)^\circ$ |
| Volume                                  | 2131.23(11) Å <sup>3</sup>                                                                       |                            |
| Z                                       | 2                                                                                                |                            |
| Density (calculated)                    | 1.627 g/cm <sup>3</sup>                                                                          |                            |
| Absorption coefficient                  | 0.873 mm <sup>-1</sup>                                                                           |                            |
| F(000)                                  | 1056.5                                                                                           |                            |
| Crystal size                            | 0.21 × 0.19 × 0.17 mm <sup>3</sup>                                                               |                            |
| Radiation                               | Mo K $\alpha$ ( $\lambda = 0.71073$ )                                                            |                            |
| 2 $\Theta$ range for data collection    | 5.54 to 56.72                                                                                    |                            |
| Index ranges                            | -12 ≤ h ≤ 12, -17 ≤ k ≤ 17, -23 ≤ l ≤ 23                                                         |                            |
| Reflections collected                   | 45301                                                                                            |                            |
| Independent reflections                 | 10628 [ $R_{\text{int}} = 0.0383$ , $R_{\text{sigma}} = 0.0344$ ]                                |                            |
| Completeness of theta = 28.310°         | 99.8%                                                                                            |                            |
| Absorption correction                   | Semi-empirical from equivalents                                                                  |                            |
| Max. and min. transmission              | 0.746 and 0.669                                                                                  |                            |
| Refinement method                       | Full-matrix least-square on F <sup>2</sup>                                                       |                            |
| Data/restraints/parameters              | 10628/0/506                                                                                      |                            |
| Goodness-of-fit on F <sup>2</sup>       | 1.045                                                                                            |                            |
| Final R indexes [ $I \geq 2\sigma(I)$ ] | $R_1 = 0.0374$ , $wR_2 = 0.0851$                                                                 |                            |
| Final R indexes [all data]              | $R_1 = 0.0447$ , $wR_2 = 0.0906$                                                                 |                            |
| Largest diff. peak/hole                 | 1.92/-1.24 e Å <sup>-3</sup>                                                                     |                            |

|                                       |                                                                                   |                            |
|---------------------------------------|-----------------------------------------------------------------------------------|----------------------------|
| Identification code                   | 23dece_0m                                                                         | CCDC2472272                |
| Empirical formula                     | C <sub>56</sub> H <sub>56</sub> Cl <sub>5</sub> N <sub>3</sub> OP <sub>2</sub> Ru |                            |
| Formula weight                        | 1127.363                                                                          |                            |
| Temperature                           | 273.15 K                                                                          |                            |
| Crystal system                        | monoclinic                                                                        |                            |
| Space group                           | P2 <sub>1</sub> /n                                                                |                            |
| Unit cell dimensions                  | a = 19.123(4) Å                                                                   | $\alpha = 90^\circ$        |
|                                       | b = 13.942(3) Å                                                                   | $\beta = 109.988(6)^\circ$ |
|                                       | c = 20.518(4) Å                                                                   | $\gamma = 90^\circ$        |
| Volume                                | 5140.7(16) Å <sup>3</sup>                                                         |                            |
| Z                                     | 4                                                                                 |                            |
| Density (calculated)                  | 1.457 g/cm <sup>3</sup>                                                           |                            |
| Absorption coefficient                | 0.671 mm <sup>-1</sup>                                                            |                            |
| F(000)                                | 2319.8                                                                            |                            |
| Crystal size                          | 0.25 × 0.21 × 0.16 mm <sup>3</sup>                                                |                            |
| Radiation                             | Mo K $\alpha$ ( $\lambda = 0.71073$ )                                             |                            |
| 2 $\Theta$ range for data collection  | 5 to 56.6°                                                                        |                            |
| Index ranges                          | -25 ≤ h ≤ 25, -18 ≤ k ≤ 18, -27 ≤ l ≤ 27                                          |                            |
| Reflections collected                 | 81526                                                                             |                            |
| Independent reflections               | 12731 [R <sub>int</sub> = 0.0885, R <sub>sigma</sub> = 0.0572]                    |                            |
| Completeness of theta = 28.310°       | 99.6 %                                                                            |                            |
| Absorption correction                 | Semi-empirical from equivalents                                                   |                            |
| Max. and min. transmission            | 0.746 and 0.676                                                                   |                            |
| Refinement method                     | Full-matrix least-square on F <sup>2</sup>                                        |                            |
| Data/restraints/parameters            | 12731/0/615                                                                       |                            |
| Goodness-of-fit on F <sup>2</sup>     | 1.118                                                                             |                            |
| Final R indexes [I >= 2 $\sigma$ (I)] | R <sub>1</sub> = 0.0421, wR <sub>2</sub> = 0.0855                                 |                            |
| Final R indexes [all data]            | R <sub>1</sub> = 0.0725, wR <sub>2</sub> = 0.1071                                 |                            |
| Largest diff. peak/hole               | 1.25/-1.07 e Å <sup>-3</sup>                                                      |                            |

Table S 6. Crystal data and structure refinement for 23dece\_0m [Ru(NNP)(PPh<sub>3</sub>)Cl<sub>2</sub>].



Table S 7. Crystal data and structure refinement for 12mayd\_0m *anti-rac*-

|                                      |                                                               |                             |
|--------------------------------------|---------------------------------------------------------------|-----------------------------|
| Identification code                  | 12mayd_0m                                                     | CCDC2472462                 |
| Empirical formula                    | C <sub>34</sub> H <sub>31</sub> ClN <sub>3</sub> OPRu         |                             |
| Formula weight                       | 506.809                                                       |                             |
| Temperature                          | 273.15 K                                                      |                             |
| Crystal system                       | triclinic                                                     |                             |
| Space group                          | P-1                                                           |                             |
| Unit cell dimensions                 | a = 10.0277(14) Å                                             | $\alpha = 113.653(3)^\circ$ |
|                                      | b = 14.344(2) Å                                               | $\beta = 96.348(3)^\circ$   |
|                                      | c = 14.788(2) Å                                               | $\gamma = 108.767(3)^\circ$ |
| Volume                               | 1773.0(4) Å <sup>3</sup>                                      |                             |
| Z                                    | 2                                                             |                             |
| Density (calculated)                 | 0.949 g/cm <sup>3</sup>                                       |                             |
| Absorption coefficient               | 0.319 mm <sup>-1</sup>                                        |                             |
| F(000)                               | 531.3                                                         |                             |
| Crystal size                         | 0.25 × 0.21 × 0.16 mm <sup>3</sup>                            |                             |
| Radiation                            | Mo K $\alpha$ ( $\lambda = 0.71073$ )                         |                             |
| 2 $\Theta$ range for data collection | 5.58 to 56.68                                                 |                             |
| Index ranges                         | -13 ≤ h ≤ 13, -19 ≤ k ≤ 19, -19 ≤ l ≤ 19                      |                             |
| Reflections collected                | 32660                                                         |                             |
| Independent reflections              | 8826 [R <sub>int</sub> = 0.0566, R <sub>sigma</sub> = 0.0547] |                             |
| Completeness of theta = 28.310°      | 99.5%                                                         |                             |
| Absorption correction                | Semi-empirical from equivalents                               |                             |
| Max. and min. transmission           | 0.746 and 0.621                                               |                             |
| Refinement method                    | Full-matrix least-square on F <sup>2</sup>                    |                             |
| Data/restraints/parameters           | 8826/0/374                                                    |                             |
| Goodness-of-fit on F <sup>2</sup>    | 1.083                                                         |                             |
| Final R indexes [I >= 2σ (I)]        | R <sub>1</sub> = 0.0543, wR <sub>2</sub> = 0.1383             |                             |
| Final R indexes [all data]           | R <sub>1</sub> = 0.0753, wR <sub>2</sub> = 0.1574             |                             |
| Largest diff. peak/hole              | 1.79/-1.22 e Å <sup>-3</sup>                                  |                             |

[Ru(NNP)(H)Cl(CO)].

Table S 8 Crystal data and structure refinement for 5jula\_O\_0m *syn-rac-*

|                                      |                                                                     |                            |
|--------------------------------------|---------------------------------------------------------------------|----------------------------|
| Identification code                  | 5jula_O_0m                                                          | CCDC2472461                |
| Empirical formula                    | C <sub>35</sub> H <sub>33</sub> Cl <sub>3</sub> N <sub>3</sub> OPRu |                            |
| Formula weight                       | 751.869                                                             |                            |
| Temperature                          | 296.15                                                              |                            |
| Crystal system                       | triclinic                                                           |                            |
| Space group                          | P-1                                                                 |                            |
| Unit cell dimensions                 | a = 11.7616(6) Å                                                    | $\alpha = 89.683(2)^\circ$ |
|                                      | b = 11.7873(5) Å                                                    | $\beta = 85.783(2)^\circ$  |
|                                      | c = 12.0837(6) Å                                                    | $\gamma = 78.997(2)^\circ$ |
| Volume                               | 1639.94(14) Å <sup>3</sup>                                          |                            |
| Z                                    | 2                                                                   |                            |
| Density (calculated)                 | 1.523 g/cm <sup>3</sup>                                             |                            |
| Absorption coefficient               | 0.805 mm <sup>-1</sup>                                              |                            |
| F(000)                               | 764.9                                                               |                            |
| Crystal size                         | 0.25 × 0.21 × 0.16 mm <sup>3</sup>                                  |                            |
| Radiation                            | Mo K $\alpha$ ( $\lambda = 0.71073$ )                               |                            |
| 2 $\theta$ range for data collection | 4.48 to 56.64                                                       |                            |
| Index ranges                         | -13 ≤ h ≤ 15, -15 ≤ k ≤ 15, -16 ≤ l ≤ 16                            |                            |
| Reflections collected                | 28382                                                               |                            |
| Independent reflections              | 8145 [R <sub>int</sub> = 0.0446, R <sub>sigma</sub> = 0.0442]       |                            |
| Completeness of theta = 28.310°      | 99.7                                                                |                            |
| Absorption correction                | Semi-empirical from equivalents                                     |                            |
| Max. and min. transmission           | 0.746 and 0.673                                                     |                            |
| Refinement method                    | Full-matrix least-square on F <sup>2</sup>                          |                            |
| Data/restraints/parameters           | 8145/0/408                                                          |                            |
| Goodness-of-fit on F <sup>2</sup>    | 1.030                                                               |                            |
| Final R indexes [I >= 2σ (I)]        | R <sub>1</sub> = 0.0331, wR <sub>2</sub> = 0.0810                   |                            |
| Final R indexes [all data]           | R <sub>1</sub> = 0.0407, wR <sub>2</sub> = 0.0847                   |                            |
| Largest diff. peak/hole              | 1.17/-1.22 e Å <sup>-3</sup>                                        |                            |

[Ru(NNP)(H)Cl(CO)].

Table S 9. Crystal data and structure refinement for 31augb\_a *anti-rac*-[Ru(NNP)(H)( $\eta^l$ -BH<sub>4</sub>)(CO)].

|                                      |                                                               |                            |
|--------------------------------------|---------------------------------------------------------------|----------------------------|
| Identification code                  | 31augb_a                                                      | CCDC2472463                |
| Empirical formula                    | C <sub>34</sub> H <sub>35</sub> BN <sub>3</sub> OPRu          |                            |
| Formula weight                       | 647.722                                                       |                            |
| Temperature                          | 273.15                                                        |                            |
| Crystal system                       | monoclinic                                                    |                            |
| Space group                          | P2 <sub>1</sub> /c                                            |                            |
| Unit cell dimensions                 | a = 9.8128(4) Å                                               | $\alpha = 90^\circ$        |
|                                      | b = 17.7134(8) Å                                              | $\beta = 101.136(1)^\circ$ |
|                                      | c = 17.5485(8) Å                                              | $\gamma = 90^\circ$        |
| Volume                               | 2992.8(2) Å <sup>3</sup>                                      |                            |
| Z                                    | 4                                                             |                            |
| Density (calculated)                 | 1.438 g/cm <sup>3</sup>                                       |                            |
| Absorption coefficient               | 0.611 mm <sup>-1</sup>                                        |                            |
| F(000)                               | 1332.1                                                        |                            |
| Crystal size                         | 0.21 × 0.18 × 0.16 mm <sup>3</sup>                            |                            |
| Radiation                            | Mo K $\alpha$ ( $\lambda = 0.71073$ )                         |                            |
| 2 $\Theta$ range for data collection | 4.74 to 56.7                                                  |                            |
| Index ranges                         | -13 ≤ h ≤ 13, -23 ≤ k ≤ 23, -23 ≤ l ≤ 23                      |                            |
| Reflections collected                | 46991                                                         |                            |
| Independent reflections              | 7466 [R <sub>int</sub> = 0.0470, R <sub>sigma</sub> = 0.0304] |                            |
| Completeness of theta = 28.310°      | 99.9                                                          |                            |
| Absorption correction                | Semi-empirical from equivalents                               |                            |
| Max. and min. transmission           | 0.746 and 0.712                                               |                            |
| Refinement method                    | Full-matrix least-square on F <sup>2</sup>                    |                            |
| Data/restraints/parameters           | 7466/0/390                                                    |                            |
| Goodness-of-fit on F <sup>2</sup>    | 1.076                                                         |                            |
| Final R indexes [I >= 2σ (I)]        | R <sub>1</sub> = 0.0287, wR <sub>2</sub> = 0.0651             |                            |
| Final R indexes [all data]           | R <sub>1</sub> = 0.0365, wR <sub>2</sub> = 0.0723             |                            |
| Largest diff. peak/hole              | 0.63/-0.65 e Å <sup>-3</sup>                                  |                            |

|                                   |                                                                                   |                 |
|-----------------------------------|-----------------------------------------------------------------------------------|-----------------|
| Identification code               | 9marb_0m                                                                          | CCDC2472464     |
| Empirical formula                 | C <sub>38</sub> H <sub>36</sub> Cl <sub>4</sub> N <sub>3</sub> OPRuS <sub>4</sub> |                 |
| Formula weight                    | 952.842                                                                           |                 |
| Temperature                       | 273.15                                                                            |                 |
| Crystal system                    | triclinic                                                                         |                 |
| Space group                       | P-1                                                                               |                 |
| Unit cell dimensions              | a = 10.3188(12) Å                                                                 | α = 100.491(3)° |
|                                   | b = 12.7542(15) Å                                                                 | β = 97.584(3)°  |
|                                   | c = 17.1219(19) Å                                                                 | γ = 112.179(3)° |
| Volume                            | 2001.3(4) Å <sup>3</sup>                                                          |                 |
| Z                                 | 2                                                                                 |                 |
| Density (calculated)              | 1.581 g/cm <sup>3</sup>                                                           |                 |
| Absorption coefficient            | 0.944 mm <sup>-1</sup>                                                            |                 |
| F(000)                            | 968.3                                                                             |                 |
| Crystal size                      | 0.26 × 0.21 × 0.18 mm <sup>3</sup>                                                |                 |
| Radiation                         | Mo Kα (λ = 0.71073)                                                               |                 |
| 2θ range for data collection      | 5.32 to 56.9                                                                      |                 |
| Index ranges                      | -13 ≤ h ≤ 13, -17 ≤ k ≤ 17, -22 ≤ l ≤ 22                                          |                 |
| Reflections collected             | 43076                                                                             |                 |
| Independent reflections           | 10039 [R <sub>int</sub> = 0.0409, R <sub>sigma</sub> = 0.0329]                    |                 |
| Completeness of theta = 28.310°   | 99.4                                                                              |                 |
| Absorption correction             | Semi-empirical from equivalents                                                   |                 |
| Max. and min. transmission        | 0.746 and 0.656                                                                   |                 |
| Refinement method                 | Full-matrix least-square on F <sup>2</sup>                                        |                 |
| Data/restraints/parameters        | 10039/0/477                                                                       |                 |
| Goodness-of-fit on F <sup>2</sup> | 1.052                                                                             |                 |
| Final R indexes [I ≥ 2σ (I)]      | R <sub>1</sub> = 0.0351, wR <sub>2</sub> = 0.0891                                 |                 |
| Final R indexes [all data]        | R <sub>1</sub> = 0.0411, wR <sub>2</sub> = 0.0950                                 |                 |
| Largest diff. peak/hole           | 2.48/-1.62 e Å <sup>-3</sup>                                                      |                 |

Table S 10. Crystal data and structure refinement for 9marb\_0m [Ru(NNP)(CS<sub>2</sub>H)<sub>2</sub>(CO)].

Table S 11. Crystal data and structure refinement for 25mayb [Cu(NNP)I].

|                                         |                                                                  |                     |
|-----------------------------------------|------------------------------------------------------------------|---------------------|
| Identification code                     | 25mayb                                                           | CCDC2472465         |
| Empirical formula                       | C <sub>33</sub> H <sub>30</sub> CuIN <sub>3</sub> P              |                     |
| Formula weight                          | 690.050                                                          |                     |
| Temperature                             | 273.15 K                                                         |                     |
| Crystal system                          | orthorhombic                                                     |                     |
| Space group                             | Pna2 <sub>1</sub>                                                |                     |
| Unit cell dimensions                    | a = 19.6143(9) Å                                                 | $\alpha = 90^\circ$ |
|                                         | b = 15.1465(7) Å                                                 | $\beta = 90^\circ$  |
|                                         | c = 10.1231(5) Å                                                 | $\gamma = 90^\circ$ |
| Volume                                  | 3007.5(3) Å <sup>3</sup>                                         |                     |
| Z                                       | 4                                                                |                     |
| Density (calculated)                    | 1.524 g/cm <sup>3</sup>                                          |                     |
| Absorption coefficient                  | 1.832 mm <sup>-1</sup>                                           |                     |
| F(000)                                  | 1384.9                                                           |                     |
| Crystal size                            | 0.25 × 0.21 × 0.18 mm <sup>3</sup>                               |                     |
| Radiation                               | Mo K $\alpha$ ( $\lambda = 0.71073$ )                            |                     |
| 2 $\Theta$ range for data collection    | 4.94 to 56.68                                                    |                     |
| Index ranges                            | -26 ≤ h ≤ 26, -20 ≤ k ≤ 20, -13 ≤ l ≤ 13                         |                     |
| Reflections collected                   | 44685                                                            |                     |
| Independent reflections                 | 7505 [ $R_{\text{int}} = 0.0544$ , $R_{\text{sigma}} = 0.0367$ ] |                     |
| Completeness of theta = 28.310°         | 1.89/1.00                                                        |                     |
| Absorption correction                   | Semi-empirical from equivalents                                  |                     |
| Max. and min. transmission              | 0.746 and 0.502                                                  |                     |
| Refinement method                       | Full-matrix least-square on F <sup>2</sup>                       |                     |
| Data/restraints/parameters              | 7505/1/352                                                       |                     |
| Goodness-of-fit on F <sup>2</sup>       | 1.042                                                            |                     |
| Final R indexes [ $I \geq 2\sigma(I)$ ] | $R_1 = 0.0313$ , $wR_2 = 0.0657$                                 |                     |
| Final R indexes [all data]              | $R_1 = 0.0333$ , $wR_2 = 0.0667$                                 |                     |
| Largest diff. peak/hole                 | 0.59/-0.88 e Å <sup>-3</sup>                                     |                     |
| Flack parameter                         | -0.460(7)                                                        |                     |

Table S 12. Crystal data and structure refinement for 13junb [(NNP)Cu(PPh<sub>3</sub>)] [BF<sub>4</sub>].

|                                   |                                                                                                              |                 |
|-----------------------------------|--------------------------------------------------------------------------------------------------------------|-----------------|
| Identification code               | 13junb                                                                                                       | CCDC2472467     |
| Empirical formula                 | C <sub>102</sub> H <sub>90</sub> B <sub>2</sub> Cu <sub>2</sub> F <sub>8</sub> N <sub>6</sub> P <sub>4</sub> |                 |
| Formula weight                    | 2164.242                                                                                                     |                 |
| Temperature                       | 273.15 K                                                                                                     |                 |
| Crystal system                    | triclinic                                                                                                    |                 |
| Space group                       | P-1                                                                                                          |                 |
| Unit cell dimensions              | a = 13.501(1) Å                                                                                              | α = 101.962(3)° |
|                                   | b = 15.6110(11) Å                                                                                            | β = 103.969(2)° |
|                                   | c = 25.256(2) Å                                                                                              | γ = 98.689(2)°  |
| Volume                            | 4938.9(7) Å <sup>3</sup>                                                                                     |                 |
| Z                                 | 2                                                                                                            |                 |
| Density (calculated)              | 1.455 g/cm <sup>3</sup>                                                                                      |                 |
| Absorption coefficient            | 0.779 mm <sup>-1</sup>                                                                                       |                 |
| F(000)                            | 2229.8                                                                                                       |                 |
| Crystal size                      | 0.21 × 0.18 × 0.16 mm <sup>3</sup>                                                                           |                 |
| Radiation                         | Mo Kα (λ = 0.71073)                                                                                          |                 |
| 2θ range for data collection      | 3.8 to 56.64                                                                                                 |                 |
| Index ranges                      | -18 ≤ h ≤ 18, -20 ≤ k ≤ 20, -33 ≤ l ≤ 33                                                                     |                 |
| Reflections collected             | 107944                                                                                                       |                 |
| Independent reflections           | 24521 [R <sub>int</sub> = 0.0589, R <sub>sigma</sub> = 0.0523]                                               |                 |
| Completeness of theta = 28.310°   | 99.8                                                                                                         |                 |
| Absorption correction             | Semi-empirical from equivalents                                                                              |                 |
| Max. and min. transmission        | 0.746 and 0.694                                                                                              |                 |
| Refinement method                 | Full-matrix least-square on F <sup>2</sup>                                                                   |                 |
| Data/restraints/parameters        | 24521/0/1117                                                                                                 |                 |
| Goodness-of-fit on F <sup>2</sup> | 1.076                                                                                                        |                 |
| Final R indexes [I ≥ 2σ (I)]      | R <sub>1</sub> = 0.0468, wR <sub>2</sub> = 0.1178                                                            |                 |
| Final R indexes [all data]        | R <sub>1</sub> = 0.0719, wR <sub>2</sub> = 0.1371                                                            |                 |
| Largest diff. peak/hole           | 0.66/-0.69 e Å <sup>-3</sup>                                                                                 |                 |

Table S 13. Crystal data and structure refinement for 16maya\_0m\_a [Cu(NNP)Cl]

|                                         |                                                                  |                           |
|-----------------------------------------|------------------------------------------------------------------|---------------------------|
| Identification code                     | 16maya_0m_a                                                      | CCDC2472466               |
| Empirical formula                       | C <sub>33</sub> H <sub>30</sub> ClCuN <sub>3</sub> P             |                           |
| Formula weight                          | 598.598                                                          |                           |
| Temperature                             | 273.15 K                                                         |                           |
| Crystal system                          | monoclinic                                                       |                           |
| Space group                             | P2 <sub>1</sub> /c                                               |                           |
| Unit cell dimensions                    | a = 14.7065(15) Å                                                | $\alpha = 90^\circ$       |
|                                         | b = 9.5484(10) Å                                                 | $\beta = 98.113(3)^\circ$ |
|                                         | c = 19.838(2) Å                                                  | $\gamma = 90^\circ$       |
| Volume                                  | 2757.8(5) Å <sup>3</sup>                                         |                           |
| Z                                       | 4                                                                |                           |
| Density (calculated)                    | 1.442 g/cm <sup>3</sup>                                          |                           |
| Absorption coefficient                  | 0.975 mm <sup>-1</sup>                                           |                           |
| F(000)                                  | 1243.0                                                           |                           |
| Crystal size                            | 0.21 × 0.18 × 0.16 mm <sup>3</sup>                               |                           |
| Radiation                               | Mo K $\alpha$ ( $\lambda = 0.71073$ )                            |                           |
| 2 $\theta$ range for data collection    | 5.96 to 56.58                                                    |                           |
| Index ranges                            | -16 ≤ h ≤ 19, -12 ≤ k ≤ 12, -26 ≤ l ≤ 15                         |                           |
| Reflections collected                   | 14356                                                            |                           |
| Independent reflections                 | 6830 [ $R_{\text{int}} = 0.0444$ , $R_{\text{sigma}} = 0.0684$ ] |                           |
| Completeness of theta = 28.310°         | 99.6                                                             |                           |
| Absorption correction                   | Semi-empirical from equivalents                                  |                           |
| Max. and min. transmission              | 0.746 and 0.652                                                  |                           |
| Refinement method                       | Full-matrix least-square on F <sup>2</sup>                       |                           |
| Data/restraints/parameters              | 6830/0/352                                                       |                           |
| Goodness-of-fit on F <sup>2</sup>       | 1.051                                                            |                           |
| Final R indexes [ $I \geq 2\sigma(I)$ ] | $R_1 = 0.0435$ , $wR_2 = 0.0948$                                 |                           |
| Final R indexes [all data]              | $R_1 = 0.0665$ , $wR_2 = 0.1074$                                 |                           |
| Largest diff. peak/hole                 | 0.78/-0.73 e Å <sup>-3</sup>                                     |                           |

|                                   |                                                                                               |                 |
|-----------------------------------|-----------------------------------------------------------------------------------------------|-----------------|
| Identification code               | 5mayc_sq                                                                                      | CCDC2472468     |
| Empirical formula                 | C <sub>67</sub> H <sub>62</sub> Cl <sub>7</sub> Cu <sub>3</sub> N <sub>6</sub> P <sub>2</sub> |                 |
| Formula weight                    | 1452.032                                                                                      |                 |
| Temperature                       | 100.00 K                                                                                      |                 |
| Crystal system                    | monoclinic                                                                                    |                 |
| Space group                       | P2 <sub>1</sub> /c                                                                            |                 |
| Unit cell dimensions              | a = 15.946(2) Å                                                                               | α = 90°         |
|                                   | b = 22.473(3) Å                                                                               | β = 112.647(3)° |
|                                   | c = 20.544(3) Å                                                                               | γ = 90°         |
| Volume                            | 6794.4(15) Å <sup>3</sup>                                                                     |                 |
| Z                                 | 4                                                                                             |                 |
| Density (calculated)              | 1.420 g/cm <sup>3</sup>                                                                       |                 |
| Absorption coefficient            | 1.297 mm <sup>-1</sup>                                                                        |                 |
| F(000)                            | 2978.                                                                                         |                 |
| Crystal size                      | 0.21 × 0.18 × 0.16 mm <sup>3</sup>                                                            |                 |
| Radiation                         | Mo Kα (λ = 0.71073)                                                                           |                 |
| 2θ range for data collection      | 5.48 to 52.74                                                                                 |                 |
| Index ranges                      | -19 ≤ h ≤ 19, -28 ≤ k ≤ 28, -25 ≤ l ≤ 25                                                      |                 |
| Reflections collected             | 88825                                                                                         |                 |
| Independent reflections           | 13866 [R <sub>int</sub> = 0.0928, R <sub>sigma</sub> = 0.0609]                                |                 |
| Completeness of theta = 28.310°   | 99.8%                                                                                         |                 |
| Absorption correction             | Semi-empirical from equivalents                                                               |                 |
| Max. and min. transmission        | 0.813 and 0.762                                                                               |                 |
| Refinement method                 | Full-matrix least-square on F <sup>2</sup>                                                    |                 |
| Data/restraints/parameters        | 13866/0/739                                                                                   |                 |
| Goodness-of-fit on F <sup>2</sup> | 1.142                                                                                         |                 |
| Final R indexes [I ≥ 2σ (I)]      | R <sub>1</sub> = 0.0519, wR <sub>2</sub> = 0.1415                                             |                 |
| Final R indexes [all data]        | R <sub>1</sub> = 0.0869, wR <sub>2</sub> = 0.1768                                             |                 |
| Largest diff. peak/hole           | 0.71/-0.80e Å <sup>-3</sup>                                                                   |                 |

Table S 14. Crystal data and structure refinement for 25mayb [Cu<sub>2</sub>(NNP)<sub>2</sub>(μ-Cl)Cl<sub>2</sub>][CuCl<sub>2</sub>].



Table S 15. MIC ( $\mu\text{g/mL}$ ) of metal salts and hydride precursors against *S. aureus* ATCC29213.

| Compounds                                                   | MIC ( $\mu\text{g/mL}$ ) |
|-------------------------------------------------------------|--------------------------|
| $\text{ZnCl}_2$                                             | >64                      |
| $[\text{Pd}(\text{CH}_3\text{CN})_2\text{Cl}_2]$            | >64                      |
| $[\text{Ru}(\text{H})\text{Cl}(\text{CO})(\text{PPh}_3)_3]$ | >64                      |
| $[\text{Ru}(\text{PPh}_3)_3\text{Cl}_2]$                    | >64                      |
| $[\text{Cu}(\text{CH}_3\text{CN})_4][\text{BF}_4]$          | >64                      |
| $[\text{Cu}(\text{CH}_3\text{CN})_4][\text{PF}_6]$          | >64                      |
| $[\text{Cu}(\text{CH}_3\text{CN})_4][\text{OTf}]$           | >64                      |
| $\text{CuCl}_2$                                             | >64                      |
| $\text{CuCl}$                                               | >64                      |
| $\text{CuI}$                                                | >64                      |

Table S 16. MIC ( $\mu\text{g/mL}$ ) of NNP copper complexes against *S. aureus* ATCC29213.

| Compounds                                                                              | MIC ( $\mu\text{g/mL}$ ) |
|----------------------------------------------------------------------------------------|--------------------------|
| [Cu(NNP)I]                                                                             | >64                      |
| [Cu(NNP)(PPh <sub>3</sub> )] [BF <sub>4</sub> ]                                        | 8                        |
| [Cu(NNP)(CH <sub>3</sub> CN)] [BF <sub>4</sub> ]                                       | 16                       |
| [Cu(NNP)(CH <sub>3</sub> CN)] [OTf]                                                    | 16                       |
| [Cu(NNP)(CH <sub>3</sub> CN)] [PF <sub>6</sub> ]                                       | 16                       |
| [Cu(NNP)Cl]                                                                            | >64                      |
| [Cu <sub>2</sub> (NNP) <sub>2</sub> ( $\mu$ -Cl)Cl <sub>2</sub> ] [CuCl <sub>2</sub> ] | 16                       |

Figure S 108. Cytotoxicity profiles

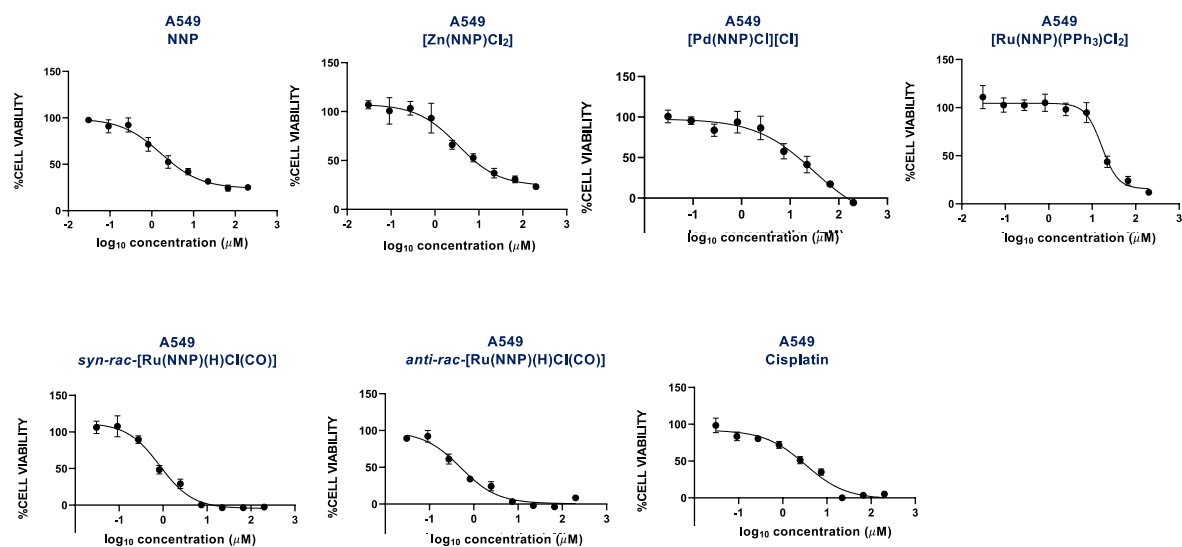

Cytotoxicity profile in A549 cell line by MTT Assay

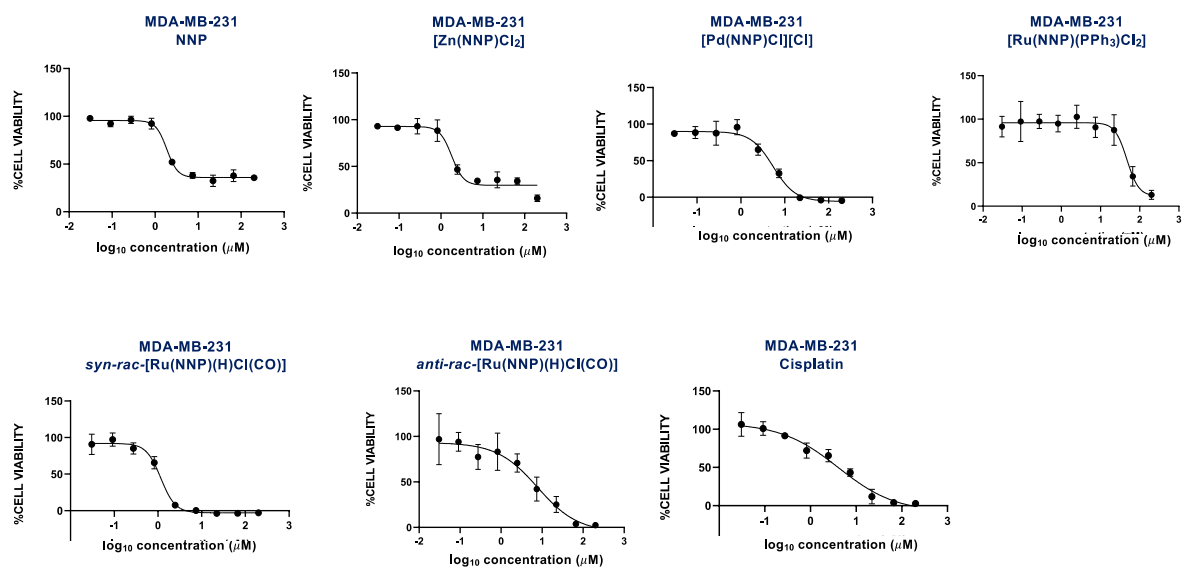

Cytotoxicity profile in MDA-MB-231 cell line by MTT Assay

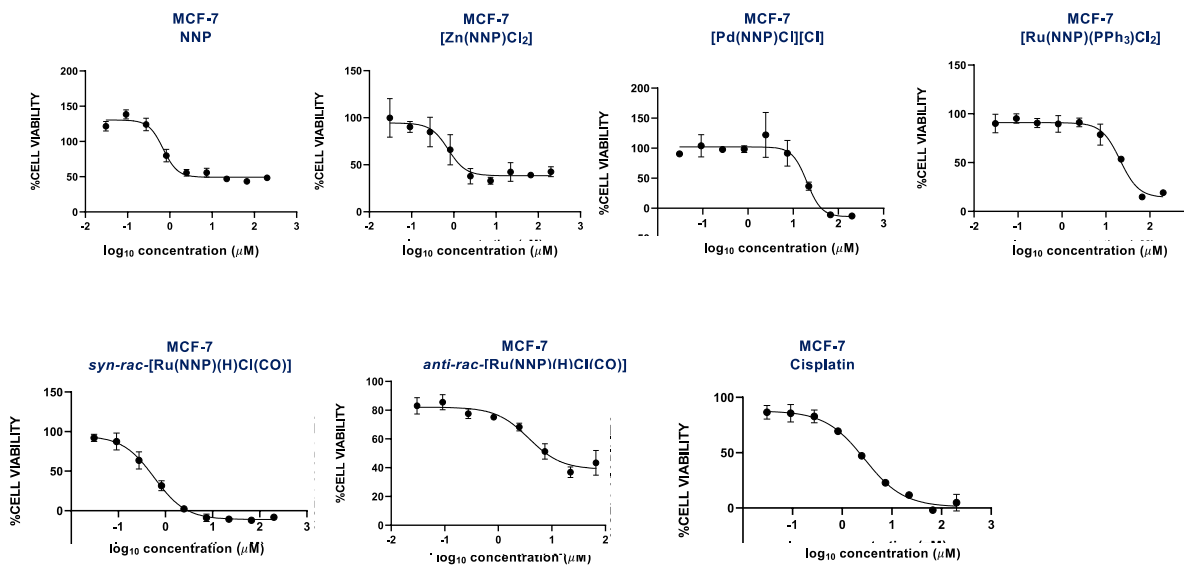

Cytotoxicity profile in MCF-7 cell line by MTT Assay

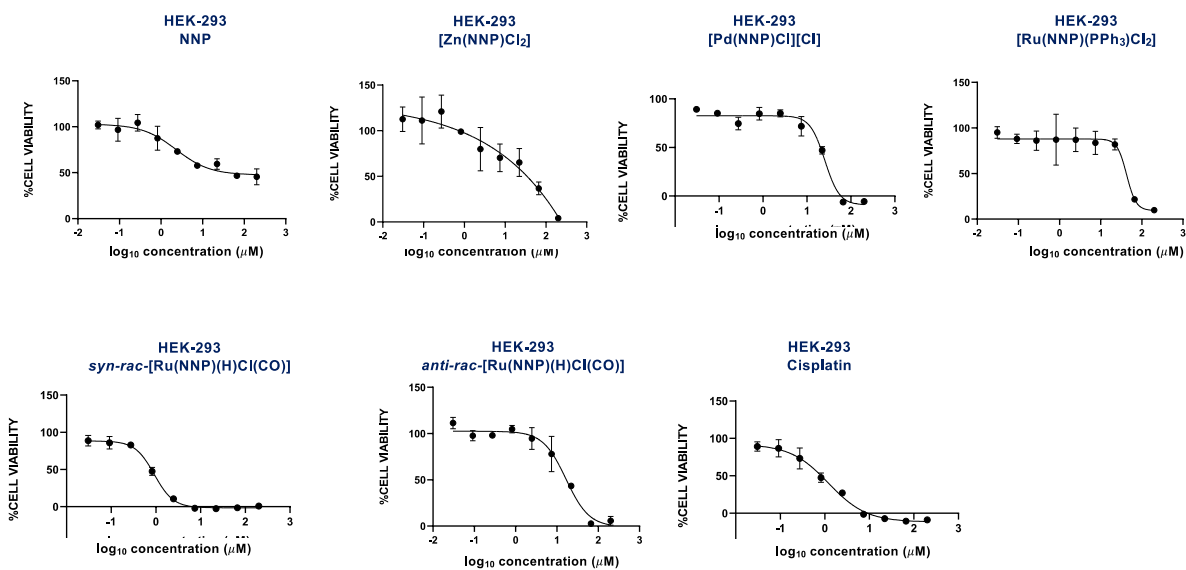

Cytotoxicity profile in HEK-293 cell line by MTT Assay
